# Supplementary material for: Improved and ligand-free copper-catalyzed cyclization for an efficient synthesis of benzimidazoles from o-bromoarylamine and nitriles
Source: Royal Society of Chemistry journal article supplement (doi:10.1039/d4ra00245h), 2024-01-01
Supplement: d4ra00245h1.pdf [file d4ra00245h1.pdf]

# Supporting Information

## Improved and Ligand-free Copper-Catalyzed Cyclization for an Efficient Synthesis of Benzimidazoles from *O*-Bromoarylamine and Nitriles

Emmanuel Mintah Bonku,<sup>†,‡,§</sup> Hongjian Qin,<sup>†,‡,\*§</sup> Abdullajon Odilov,<sup>†,‡</sup> Safomuddin Abduahadi,<sup>†,‡</sup>  
Samuel Desta Guma,<sup>†,‡</sup> Feipu Yang,<sup>†</sup> Fuqiang Zhu,<sup>ϕ</sup> Haji A. Aisa,<sup>‡,\*§</sup> Jingshan Shen,<sup>†,‡,\*</sup>

<sup>†</sup>State Key Laboratory of Drug Research, Shanghai Institute of Materia Medica, Chinese Academy of Sciences, 555 Zuchongzhi Road, Shanghai 201203, P. R. China

<sup>‡</sup>University of Chinese Academy of Sciences, No. 19A Yuquan Road, Beijing 100049, P. R. China

<sup>§</sup>State Key Laboratory Basis of Xinjiang Indigenous Medicinal Plants Resource Utilization, Xinjiang Technical Institute of Physics and Chemistry, Chinese Academy of Sciences, Urumqi, Xinjiang 830011, P. R. China

<sup>ϕ</sup>Topharman Shanghai Co., Ltd., No.388 Jialilue Road, Zhangjiang Hitech Park, Shanghai 201203 P.R. China

\*Corresponding authors:

\*E-mail: [shenjingshan@simm.ac.cn](mailto:shenjingshan@simm.ac.cn)

\*E-mail: [haji@ms.xjb.ac.cn](mailto:haji@ms.xjb.ac.cn)

<sup>§</sup>These authors contributed equally to this work.

## Context

### Analytical Data of Related Compounds

#### Benzimidazoles 2

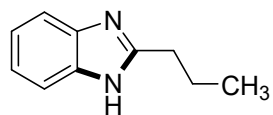

$^1\text{H NMR}$  (500 MHz,  $\text{CDCl}_3$ )  $\delta$  7.92 (brs, 1H), 7.56 (dd,  $J = 6.0, 3.2$  Hz, 2H), 7.35 – 7.16 (m, 2H), 2.93 (t,  $J = 7.6$  Hz, 2H), 1.95 – 1.86 (m, 2H), 1.01 (t,  $J = 7.4$  Hz, 3H)

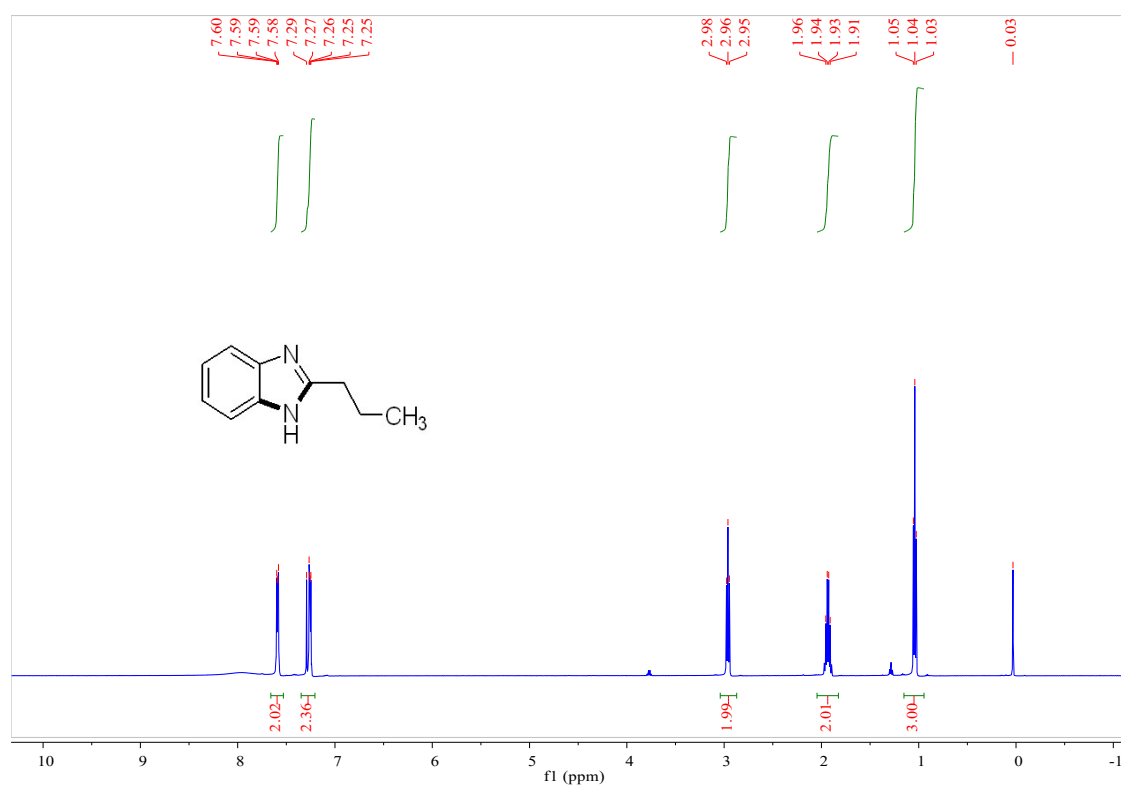

Figure S1  $^1\text{H NMR}$  of compound **2** in  $\text{CDCl}_3$

$^{13}\text{C}$  NMR (125 MHz,  $\text{CDCl}_3$ )  $\delta$  155.6, 138.5, 122.1, 114.6, 31.2, 21.8, 13.8; HRMS (ESI)  $m/z$   $[\text{M} + \text{H}]^+$  calcd for  $\text{C}_{10}\text{H}_{13}\text{N}_2$  161.1073, found 161.1071.

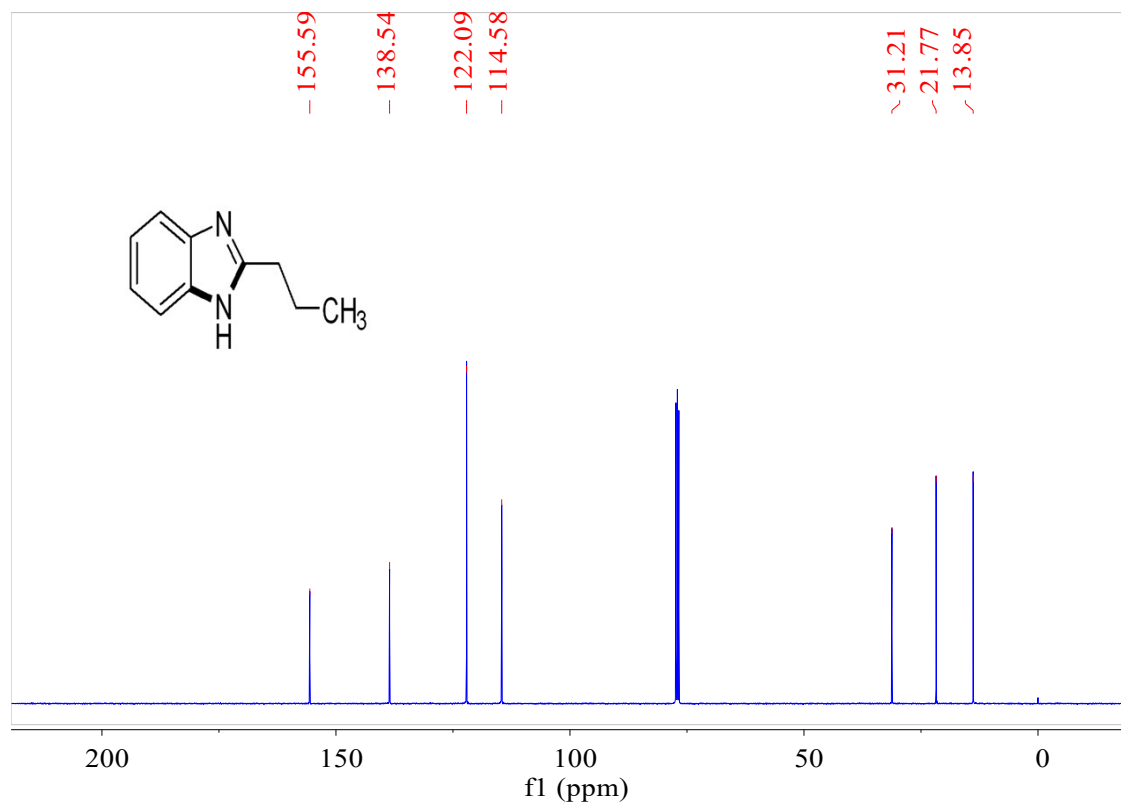

**Figure S2**  $^{13}\text{C}$  NMR of compound 2 in  $\text{CDCl}_3$

### Benzimidazoles 2a

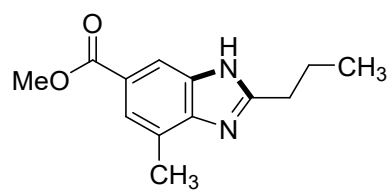

$^1\text{H}$  NMR (400 MHz,  $\text{CDCl}_3$ )  $\delta$  8.87 (brs, 1H), 8.11 (s, 1H), 7.77 (s, 1H), 3.91 (s, 3H), 2.93 (t,  $J$  = 7.6 Hz, 2H), 2.57 (s, 3H), 1.94 – 1.83 (m, 2H), 0.96 (t,  $J$  = 7.4 Hz, 3H)

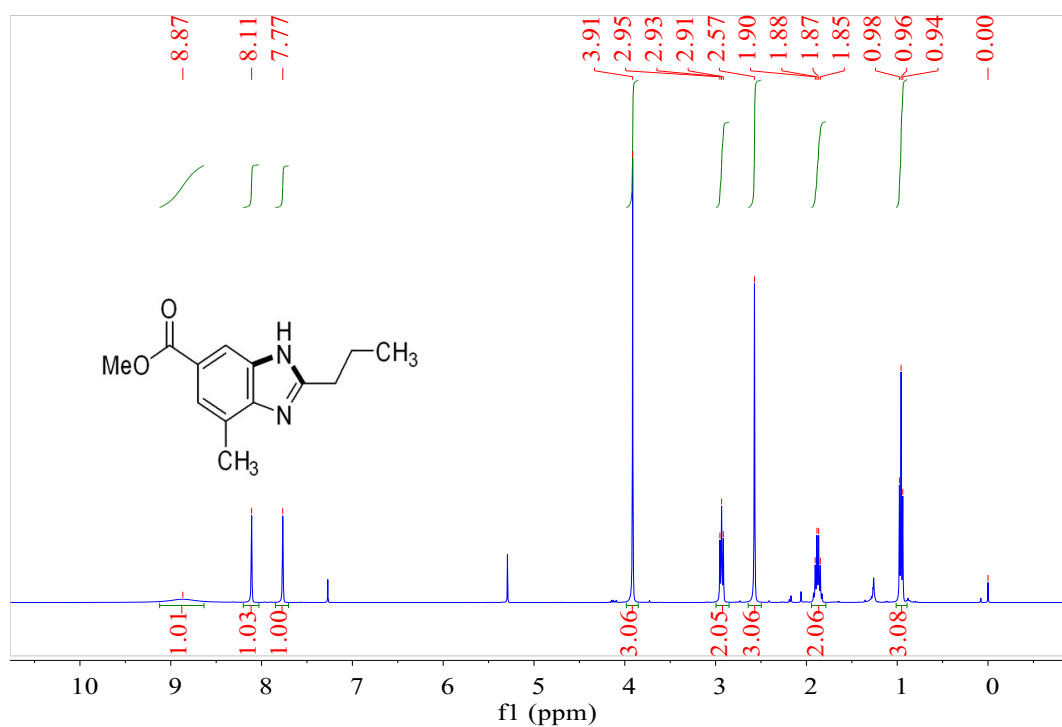

Figure S3  $^1\text{H}$  NMR of compound 2a in  $\text{CDCl}_3$

$^{13}\text{C}$  NMR (100 MHz,  $\text{CDCl}_3$ )  $\delta$  168.1, 157.3, 141.8, 137.5, 124.6, 124.2, 124.1, 114.3, 52.1, 31.3, 21.8, 17.1, 13.8; HRMS (ESI):  $m/z$   $[\text{M} + \text{H}]^+$  calcd for  $\text{C}_{13}\text{H}_{17}\text{N}_2\text{O}_2$  233.1285, found: 233.1281.

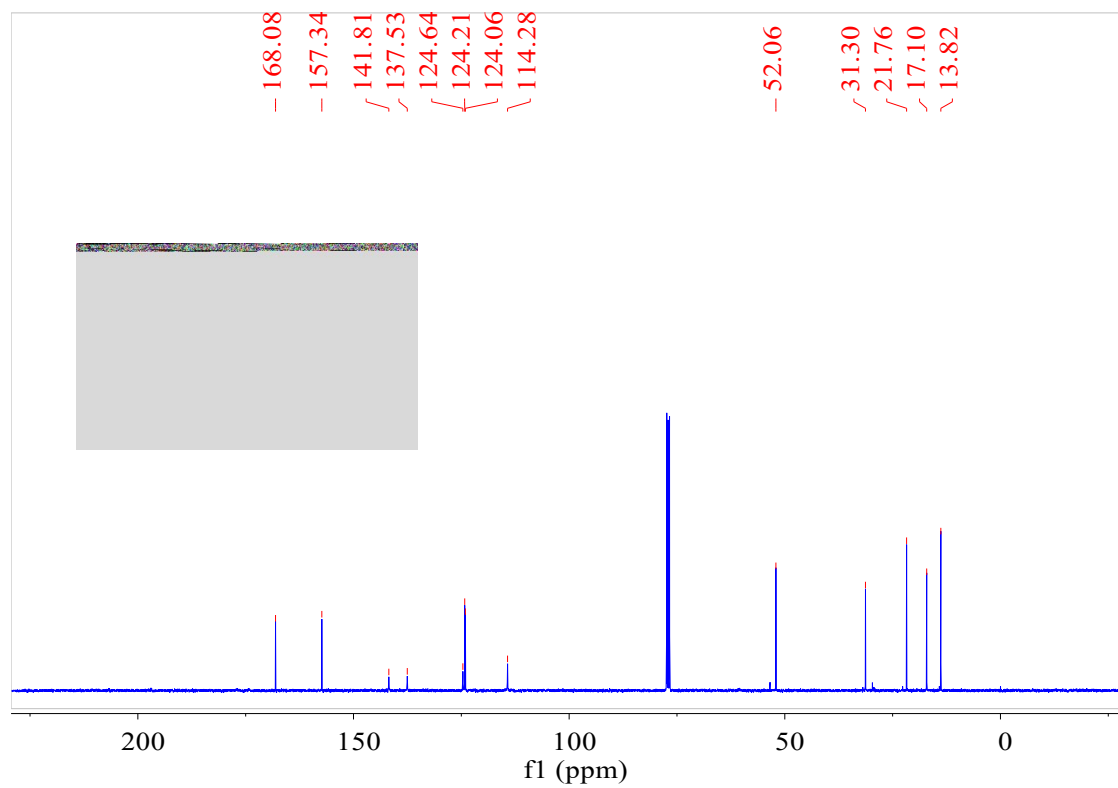

**Figure S4**  $^{13}\text{C}$  NMR of compound **2a** in  $\text{CDCl}_3$

## Benzimidazoles 2b

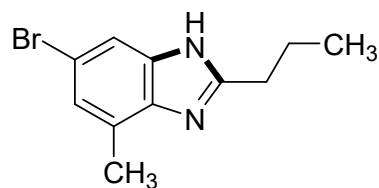

Two sets of <sup>1</sup>H NMR data representing two isomers (10:9) were observed as indicative of the presence of tautomerism; <sup>1</sup>H NMR (400 MHz, DMSO-*d*<sub>6</sub>, major isomer) δ 12.30 (s, 1 H), 7.51 (s, 1 H), 7.08 (s, 1H), 2.77 (t, *J* = 7.1 Hz, 2H), 2.45 (s, 3 H), 1.78 (dt, *J* = 14.3, 7.2 Hz, 2H), 0.94 (t, *J* = 7.4 Hz, 3H); HNMR (400 MHz, DMSO-*d*<sub>6</sub>, minor isomer) δ 12.24 (s, 1 H), 7.40 (s, 1H), 7.08 (s, 1H), 2.77 (t, *J* = 7.1 Hz, 2H), 2.48 (s, 3H), 1.78 (dt, *J* = 14.3, 7.2 Hz, 2H), 0.94 (t, *J* = 7.4 Hz, 3H)

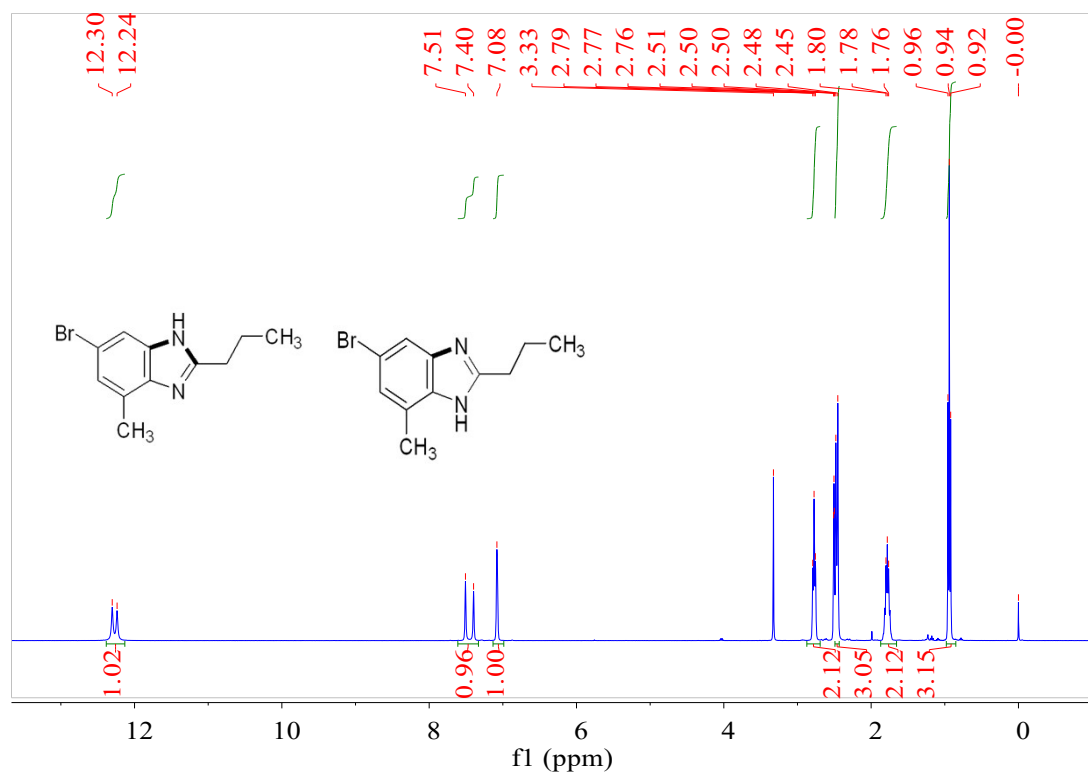

Figure S5 <sup>1</sup>H NMR of compound 2b in DMSO-*d*<sub>6</sub>

$^{13}\text{C}$  NMR (101 MHz,  $\text{DMSO-}d_6$ , minor isomer)  $\delta$  156.8, 155.6, 144.9, 142.3, 135.4, 133.6, 130.3, 124.9, 124.2, 123.2, 118.4, 113.8, 113.4, 111.3, 30.1, 30.9, 21.4, 17.1, 16.7, 14.1. HRMS (ESI):  $m/z$   $[\text{M} + \text{H}]^+$  calcd for  $\text{C}_{11}\text{H}_{14}\text{BrN}_2$  253.0335, found: 253.0332.

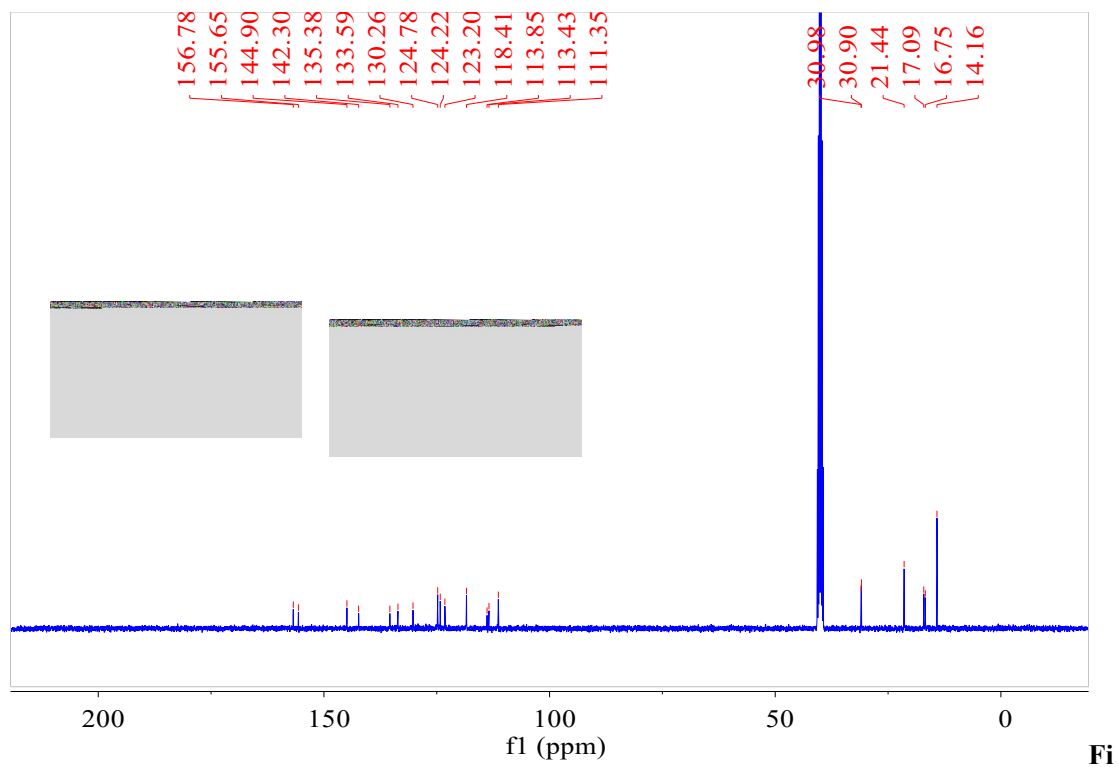

Figure S6  $^{13}\text{C}$  NMR of compound **2b** in  $\text{DMSO-}d_6$

### Benzimidazoles 2c

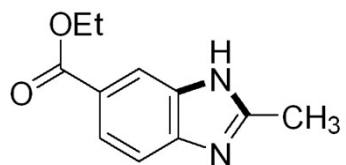

$^1\text{H NMR}$  (400 MHz,  $\text{CDCl}_3$ )  $\delta$  8.30 (s, 1H), 7.98 (dd,  $J = 8.5, 1.4$  Hz, 1H), 7.58 (d,  $J = 8.5$  Hz, 1H), 4.42 (q,  $J = 7.1$  Hz, 2H), 2.70 (s, 3H), 1.43 (t,  $J = 7.1$  Hz, 3H).

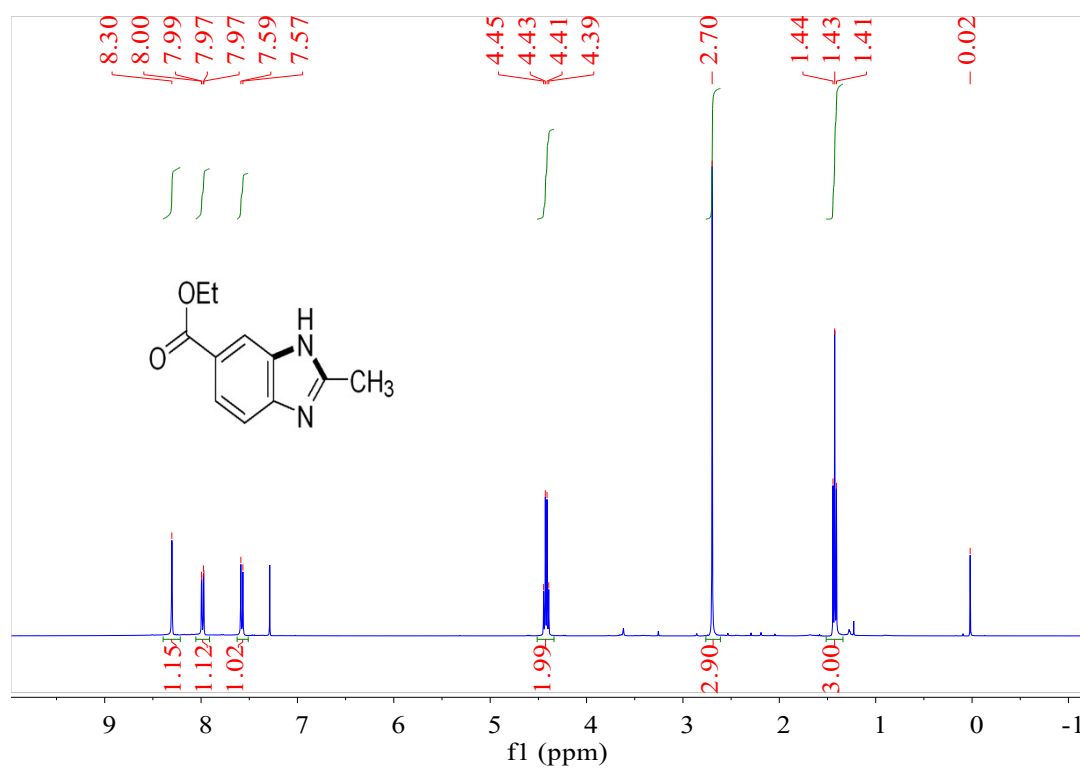

**Figure S7**  $^1\text{H NMR}$  of compound **2c** in  $\text{CDCl}_3$



$^{13}\text{C}$  NMR (100 MHz,  $\text{CDCl}_3$ )  $\delta$  167.4, 153.7, 142.4, 138.1, 124.6, 123.9, 114.2, 60.1, 15.1, 14.3.

HRMS (ESI):  $m/z$   $[\text{M} + \text{H}]^+$  calcd for  $\text{C}_{11}\text{H}_{13}\text{N}_2\text{O}_2$  205.0972, found: 205.0969.

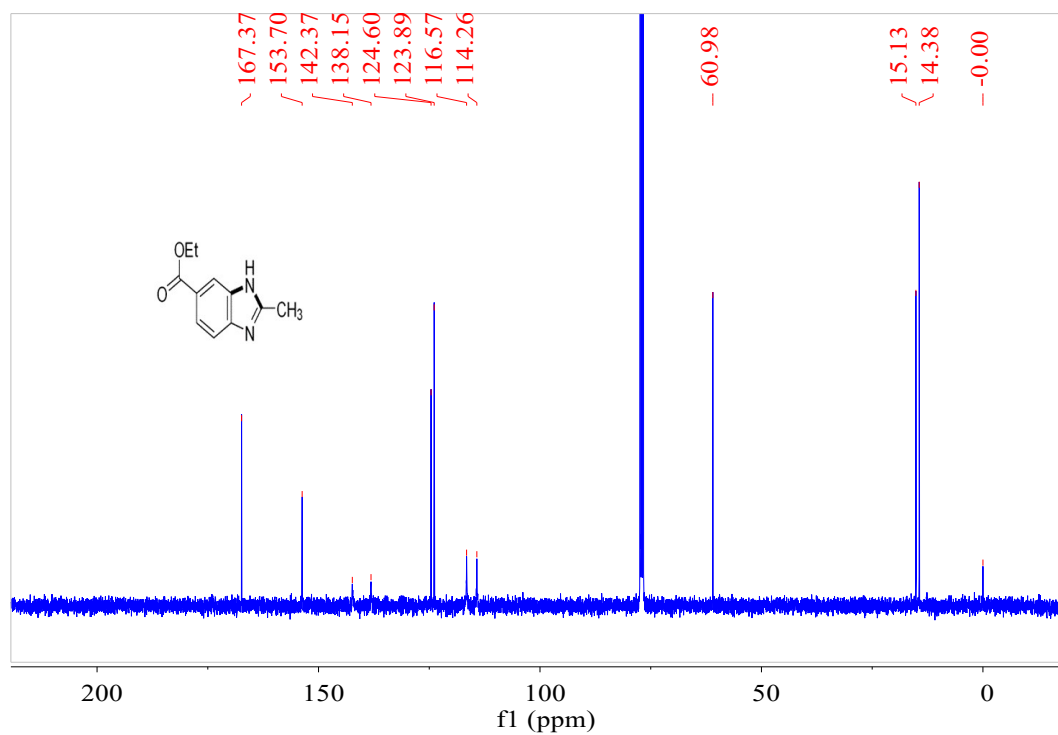

**Figure S8**  $^{13}\text{C}$  NMR of compound **2c** in  $\text{CDCl}_3$

## Benzimidazoles 2d

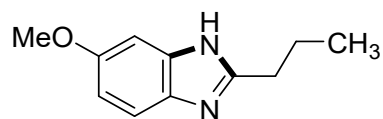

$^1\text{H}$  NMR (400 MHz,  $\text{CDCl}_3$ )  $\delta$  7.36 (d,  $J = 8.7$  Hz, 1H), 6.97 (d,  $J = 1.3$  Hz, 1H), 6.83 – 6.74 (m, 1H), 3.73 (s, 3H), 2.82 (t,  $J = 7.5$  Hz, 2H), 1.86 – 1.72 (m, 2H), 0.90 (t,  $J = 7.3$  Hz, 3H)

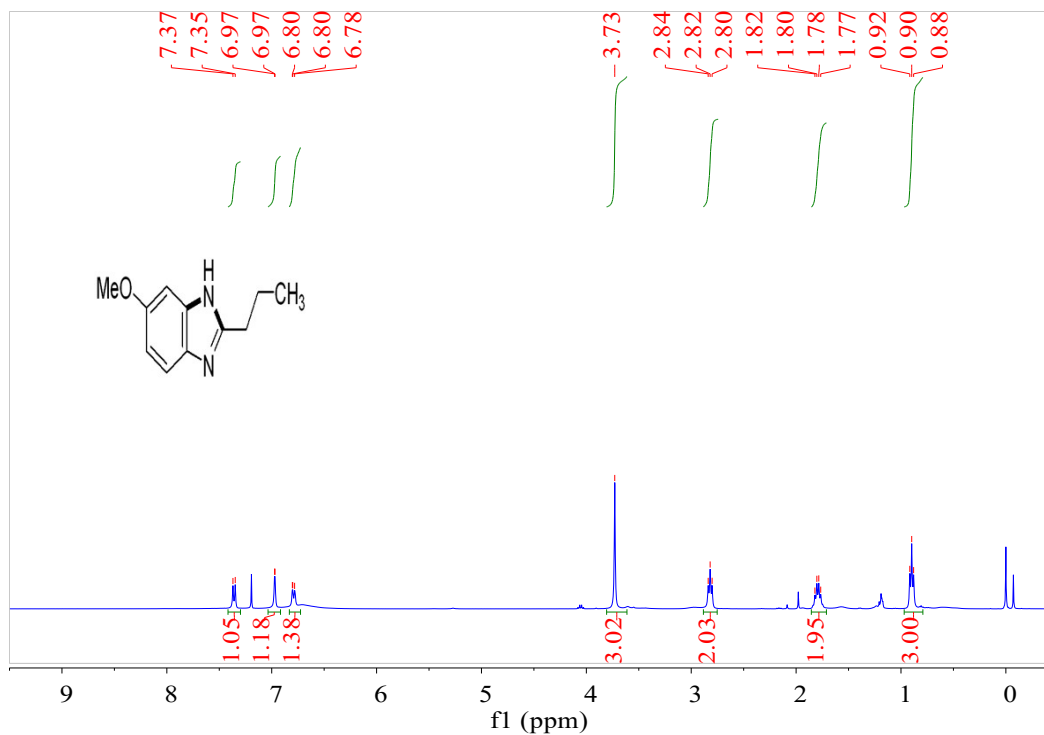

**Figure S9**  $^1\text{H}$  NMR of compound **2d** in  $\text{CDCl}_3$

$^{13}\text{C}$  NMR (100 MHz,  $\text{CDCl}_3$ )  $\delta$  156.4, 154.5, 137.9, 132.4, 115.1, 111.8, 97.5, 55.8, 30.9, 21.6, 13.7;

HRMS (ESI):  $m/z$   $[\text{M} + \text{H}]^+$  calcd for  $\text{C}_{11}\text{H}_{15}\text{N}_2\text{O}$  191.1179, found: 191.1177.

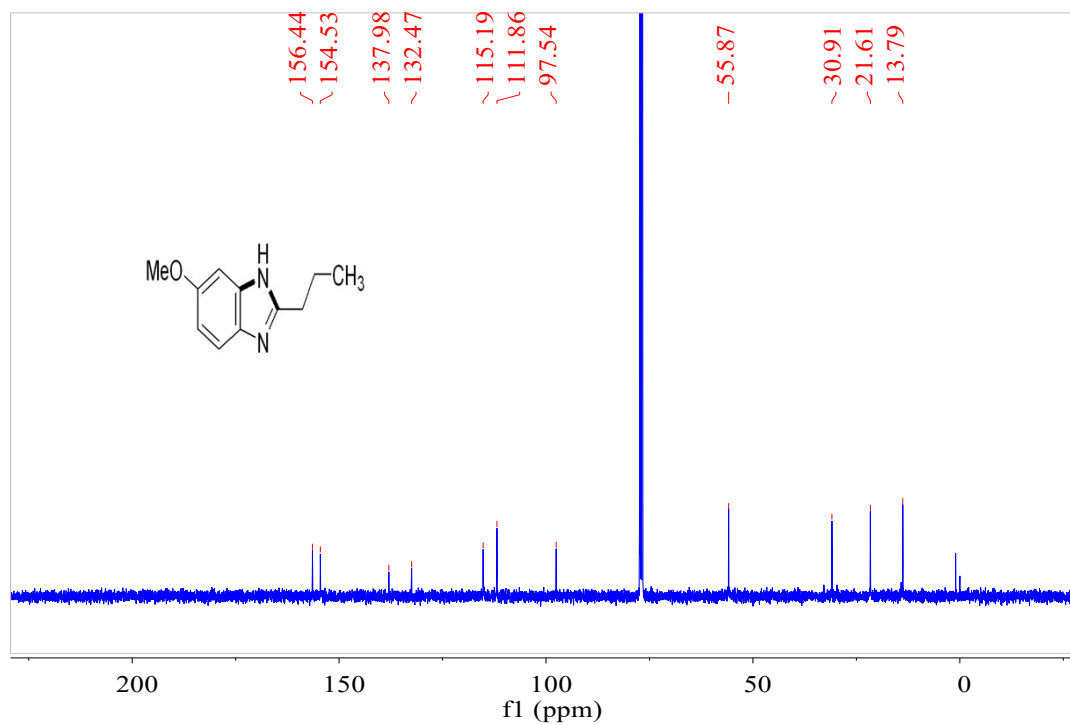

**Figure S10**  $^{13}\text{C}$  NMR of compound **2d** in  $\text{CDCl}_3$

## Benzimidazoles 2e

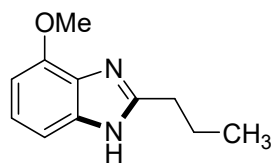

$^1\text{H NMR}$  (400 MHz,  $\text{CDCl}_3$ )  $\delta$  7.22 – 7.07 (m, 2H), 6.67 (dd,  $J = 7.5, 1.2$  Hz, 1H), 3.94 (s, 3H), 2.90 (t,  $J = 7.4$  Hz, 2H), 2.03 – 1.76 (m, 2H), 0.99 (t,  $J = 7.4$  Hz, 3H);

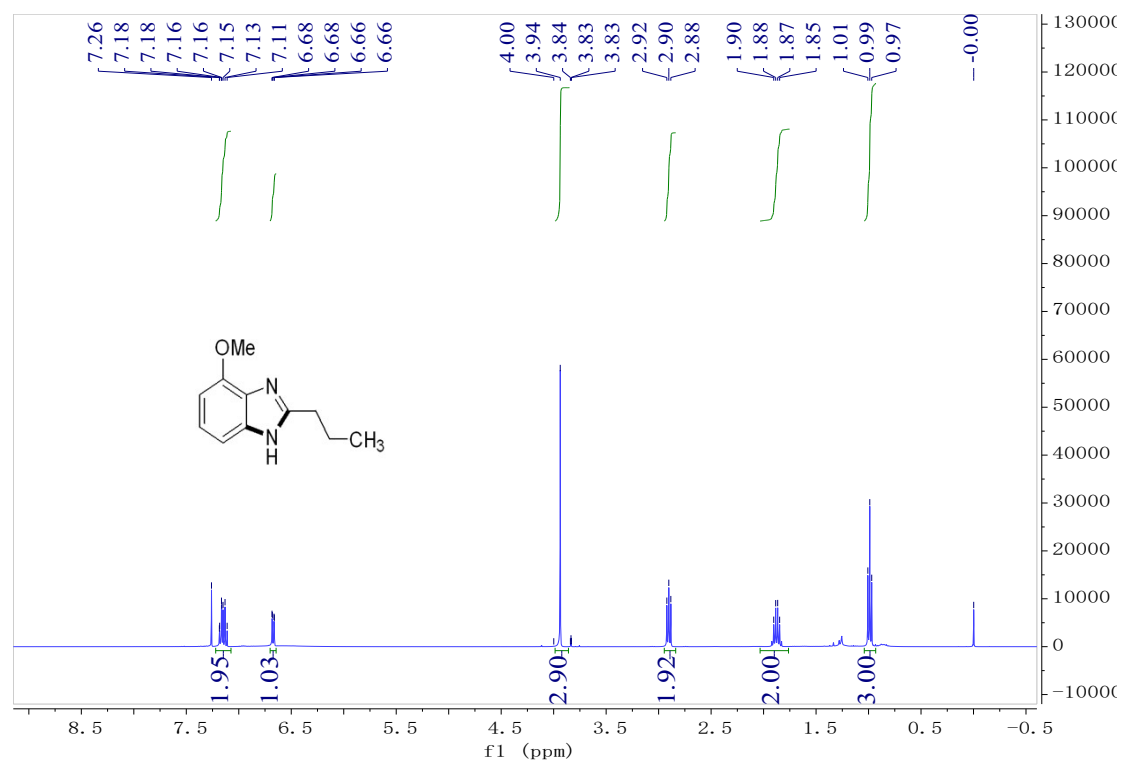

**Figure S11**  $^1\text{H NMR}$  of compound **2e** in  $\text{CDCl}_3$

$^{13}\text{C}$  NMR (100 MHz,  $\text{CDCl}_3$ )  $\delta$  154.0, 148.3, 139.7, 128.6, 122.6, 107.4, 102.6, 55.5, 31.1, 21.7, 13.8; HRMS (ESI):  $m/z$   $[\text{M} + \text{H}]^+$  calcd for  $\text{C}_{11}\text{H}_{15}\text{N}_2\text{O}$  191.1179, found: 191.1176.

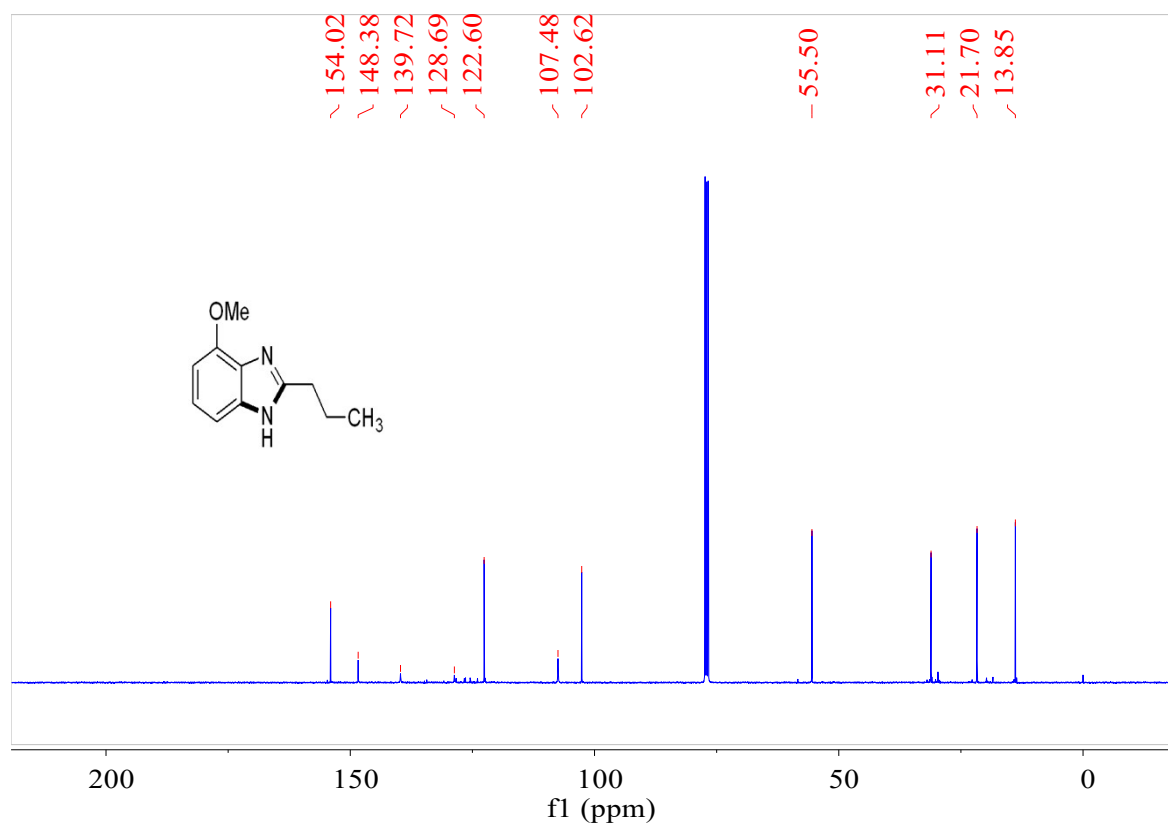

**Figure S12**  $^{13}\text{C}$  NMR of compound **2e** in  $\text{CDCl}_3$

### Benzimidazoles 2f

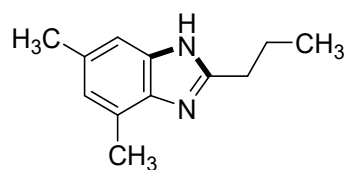

$^1\text{H}$  NMR (400 MHz,  $\text{CD}_3\text{OD}$ )  $\delta$  7.34 (s, 1H), 7.20 (s, 1H), 3.16 – 3.12 (m, 2 H), 2.59 (s, 3H), 2.49 (s, 3H), 2.07 – 1.86 (m, 2H), 1.07 (t,  $J = 7.4$  Hz, 3H)

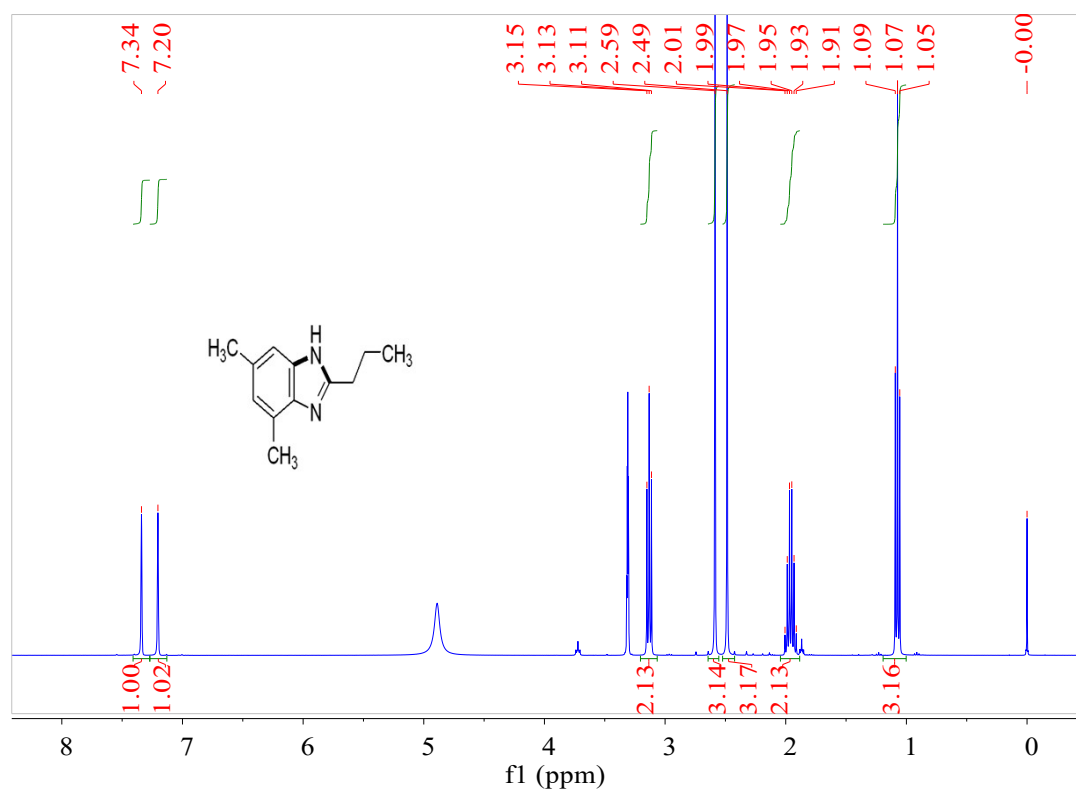

Figure S13  $^1\text{H}$  NMR of compound 2f in  $\text{CD}_3\text{OD}$

$^{13}\text{C}$  NMR (100 MHz,  $\text{CD}_3\text{OD}$ )  $\delta$  153.3, 136.7, 131.0, 128.6, 127.9, 123.6, 110.1, 27.8, 20.6, 20.1, 15.1, 12.3; HRMS (ESI):  $m/z$   $[\text{M} + \text{H}]^+$  calcd for  $\text{C}_{12}\text{H}_{17}\text{N}_2$  189.1386, found: 189.1383

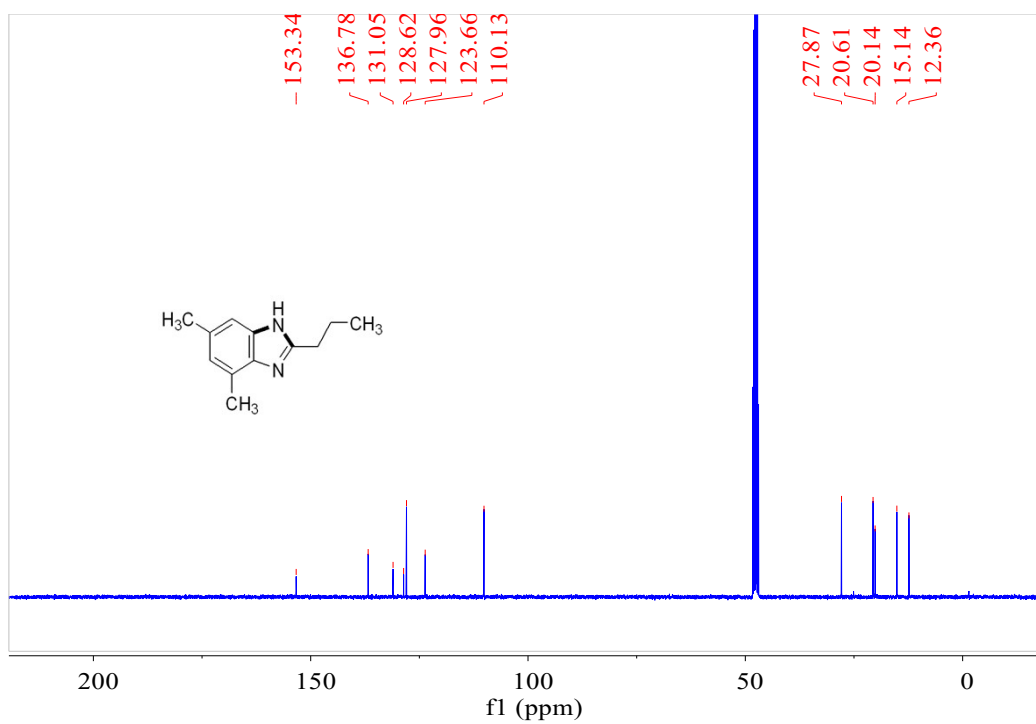

**Figure S14**  $^{13}\text{C}$  NMR of compound **2f** in  $\text{CD}_3\text{OD}$

### Benzimidazoles 2g

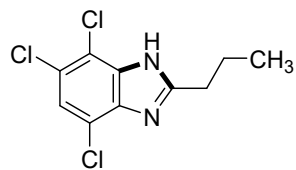

$^1\text{H NMR}$  (400 MHz,  $\text{DMSO-}d_6$ )  $\delta$  13.12 (s, 1H), 7.52 (s, 1H), 2.84 (t,  $J = 7.5$  Hz, 2H), 1.87 – 1.75 (m, 2H), 0.95 (t,  $J = 7.4$  Hz, 3H)

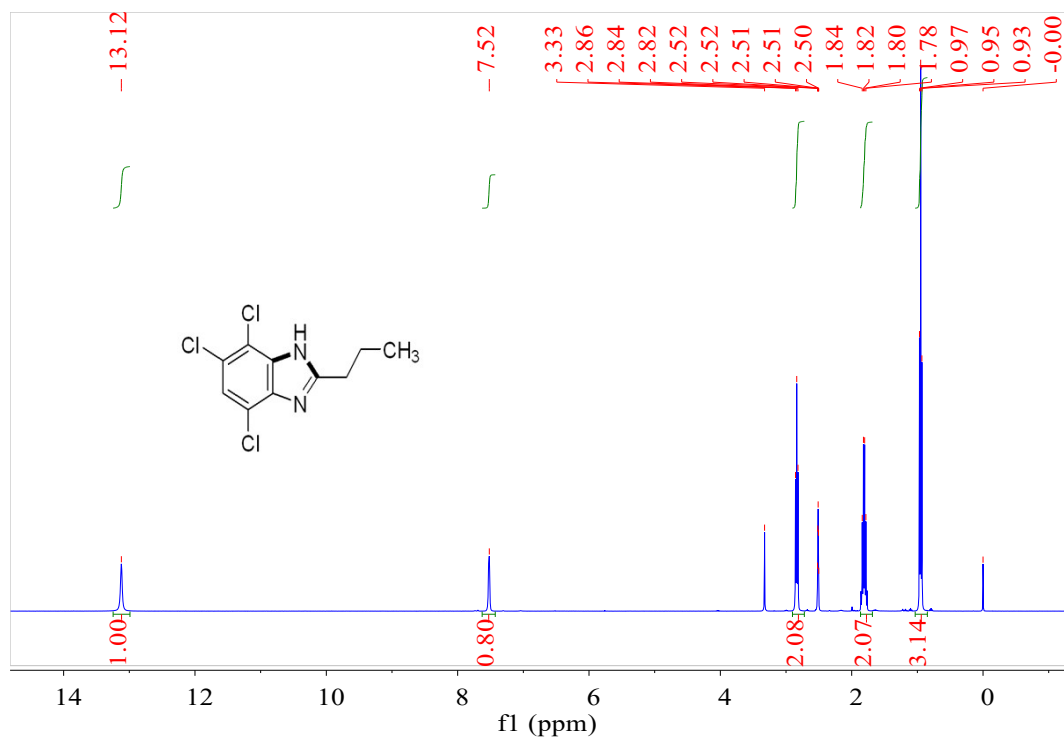

Figure S15  $^1\text{H NMR}$  of compound **2g** in  $\text{DMSO-}d_6$



$^{13}\text{C}$  NMR (100 MHz,  $\text{CD}_3\text{OD}$ )  $\delta$  159.6, 132.6, 131.2, 130.7, 128.1, 119.3, 117.7, 29.65, 22.6, 13.9;

HRMS (ESI):  $m/z$   $[\text{M} + \text{H}]^+$  calcd for  $\text{C}_{10}\text{H}_{10}\text{Cl}_3\text{N}_2$  262.9904, found: 262.9898.

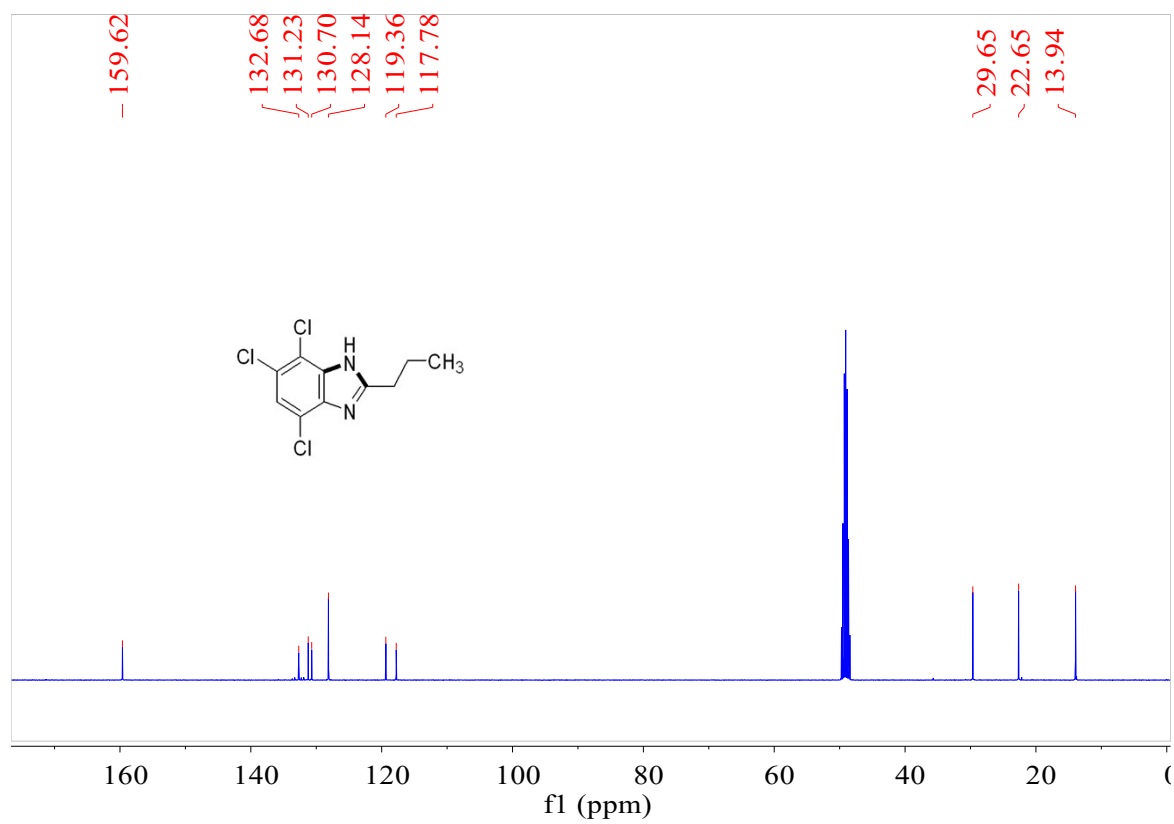

**Figure S16**  $^{13}\text{C}$  NMR of compound **2g** in  $\text{CD}_3\text{OD}$

## Benzimidazoles 2h

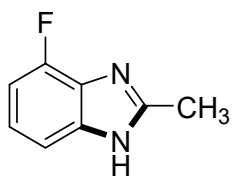

Two sets of  $^1\text{H}$ NMR data representing two isomers (3:1) were observed as indicative of the presence of tautomerism;  $^1\text{H}$  NMR (400 MHz,  $\text{DMSO-}d_6$ , major isomer)  $\delta$  12.47 (s, 1H), 7.24 (d,  $J = 8.0$  Hz, 1H), 7.13 – 7.03 (m, 1H), 6.99 – 6.84 (m, 1H), 2.49 (s, 3H).  $^1\text{H}$ NMR (400 MHz,  $\text{DMSO-}d_6$ , minor isomer)  $\delta$  12.71 (s, 1H), 7.34 (d,  $J = 7.6$  Hz, 1H), 7.13 – 7.03 (m, 1H), 7.01 – 6.89 (m, 1H), 2.49 (s, 3H).

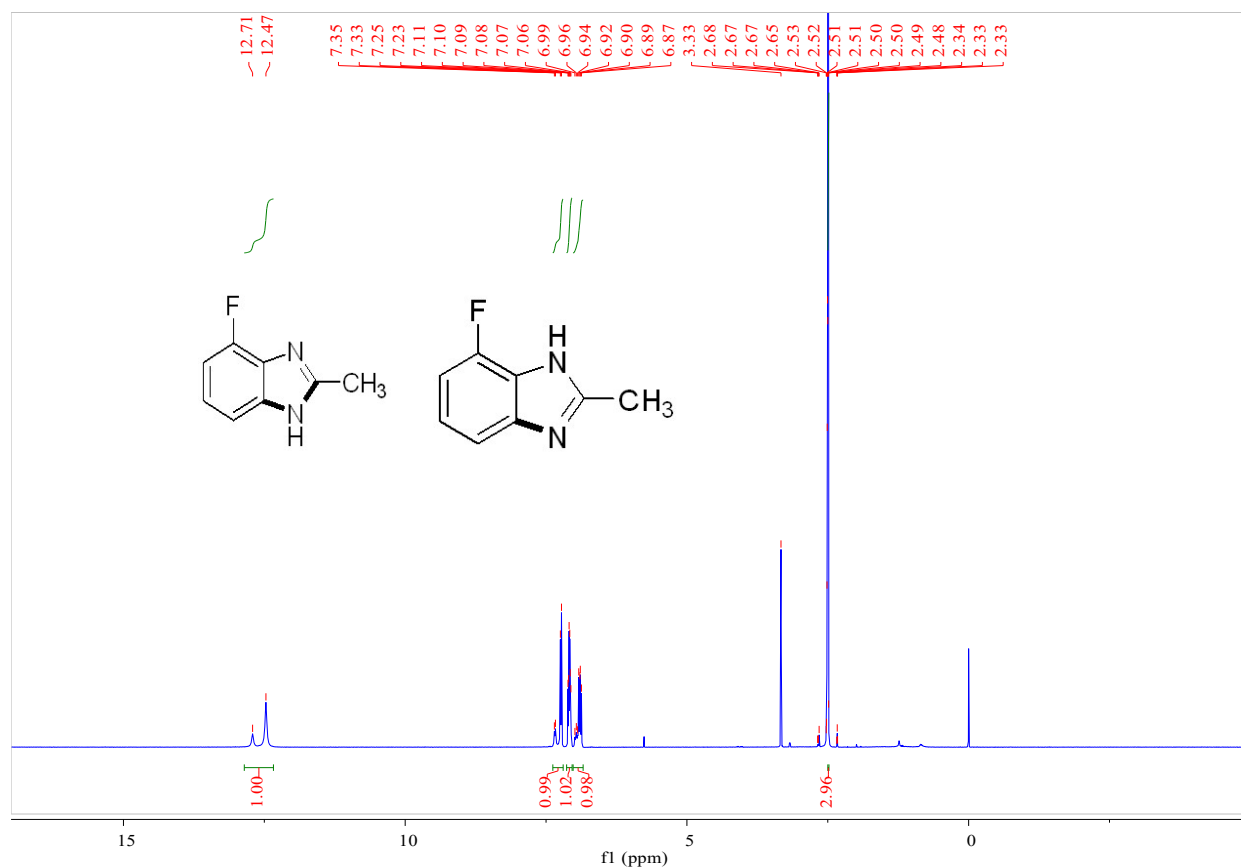

Figure S17  $^1\text{H}$  NMR of compound **2h** in  $\text{DMSO-}d_6$

$^{13}\text{C}$  NMR (101 MHz, DMSO)  $\delta$  154.2, 152.3, 151.7, 138.1, 138.0, 132.0, 122.3, 122.2, 107.5, 106.80, 106.6, 15.0; HRMS (ESI):  $m/z$   $[\text{M} + \text{H}]^+$  calcd for  $\text{C}_8\text{H}_8\text{FN}_2$  151.0666, found: 151.0662.

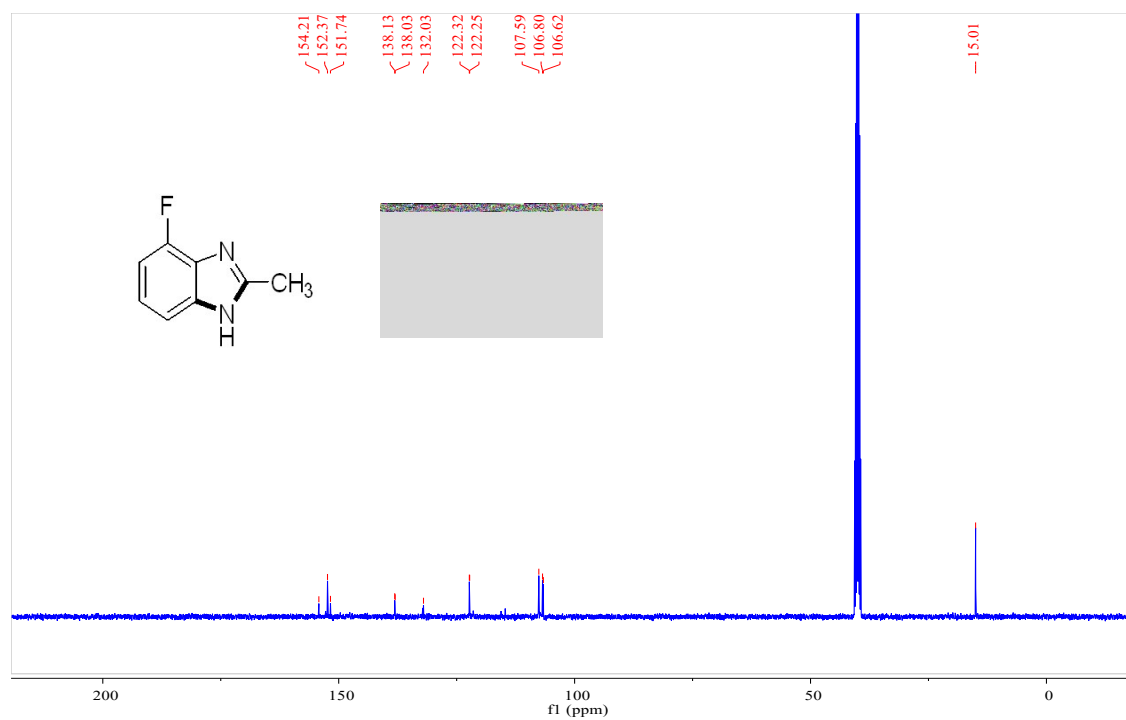

**Figure S18**  $^{13}\text{C}$  NMR of compound **2h** in  $\text{DMSO}-d_6$

$^{19}\text{F}$  NMR (377 MHz, DMSO)  $\delta$  -135.23.

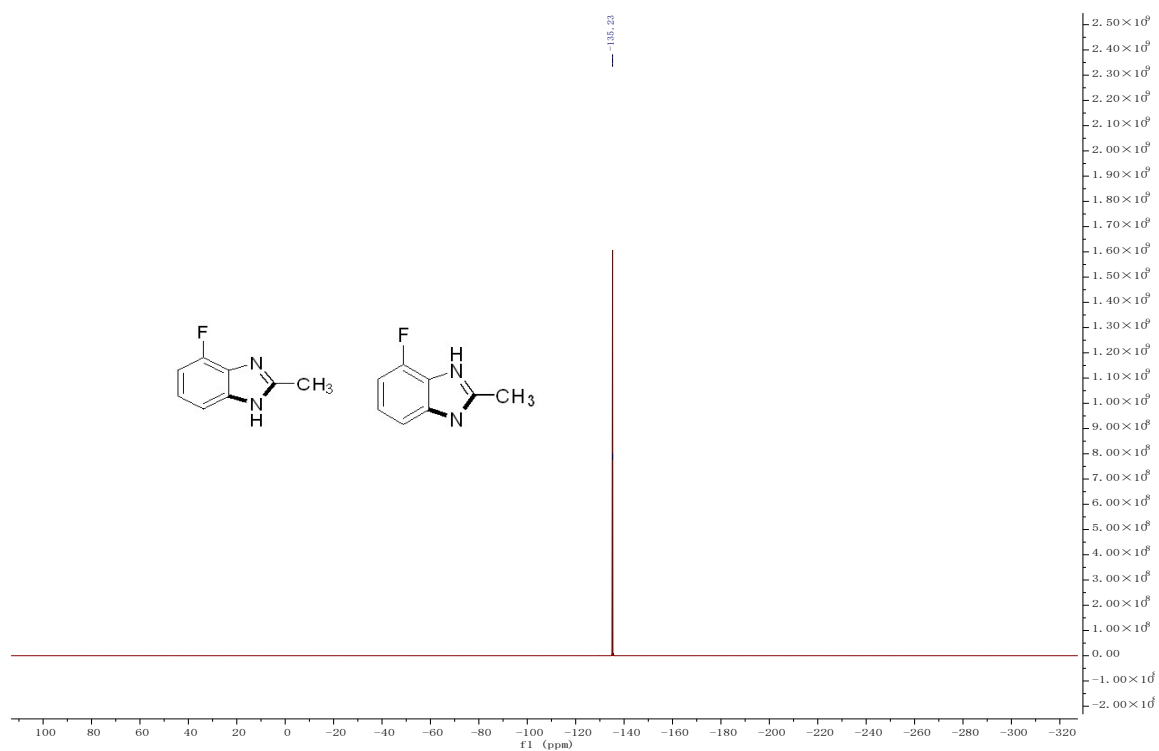

**Figure S19**  $^{19}\text{F}$  NMR of compound **2h** in  $\text{DMSO-}d_6$

## Benzimidazoles 2i

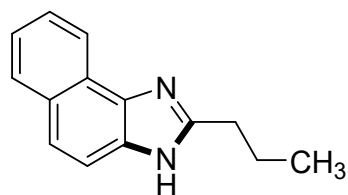

$^1\text{H NMR}$  (400 MHz,  $\text{CD}_3\text{OD}$ )  $\delta$  8.36 – 8.28 (m, 1H), 8.09 – 8.01 (m, 1H), 7.97 – 7.89 (m, 1H), 7.78 – 7.67 (m, 2H), 7.67 – 7.60 (m, 1H), 3.22 (t,  $J = 7.7$  Hz, 2H), 2.08 – 1.95 (m, 2H), 1.11 (t,  $J = 7.3$  Hz, 3H).

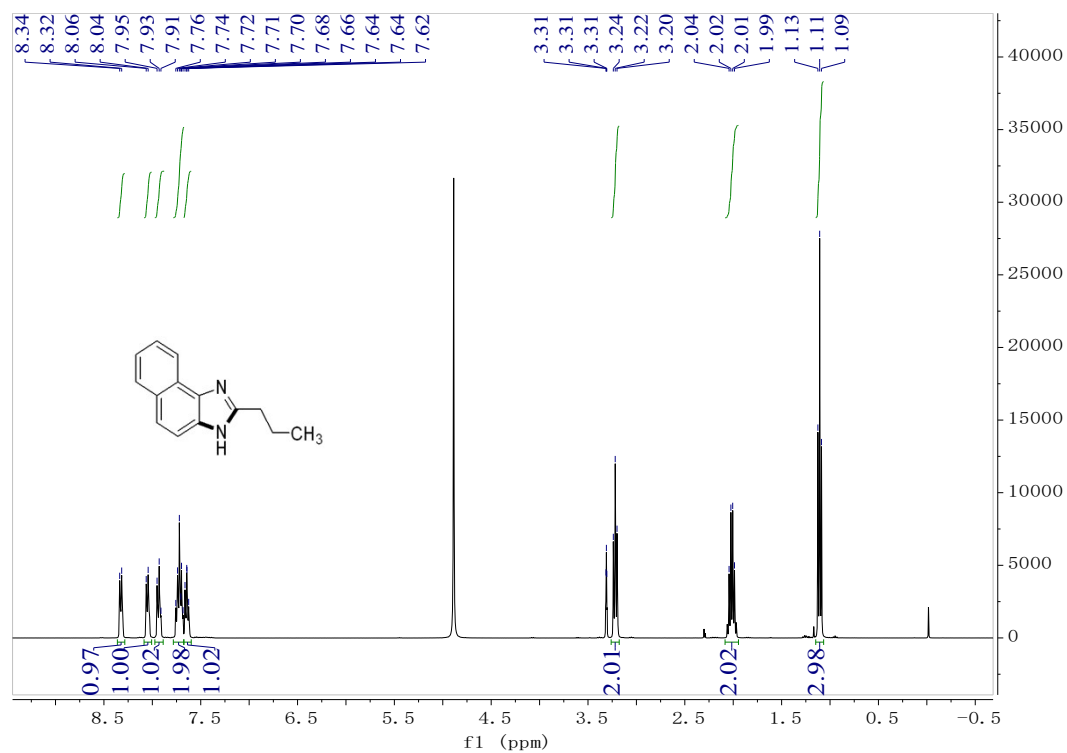

**Figure S20**  $^1\text{H NMR}$  of compound **2i** in  $\text{CD}_3\text{OD}$

$^{13}\text{C}$  NMR (100 MHz,  $\text{CD}_3\text{OD}$ )  $\delta$  153.0, 132.6, 132.6, 130.3, 129.3, 129.2, 128.6, 127.9, 122.1, 121.9, 113.1, 29.2, 22.1, 13.8; HRMS (ESI):  $m/z$   $[\text{M} + \text{H}]^+$  calcd for  $\text{C}_{14}\text{H}_{15}\text{N}_2$  211.1230, found: 211.1226.

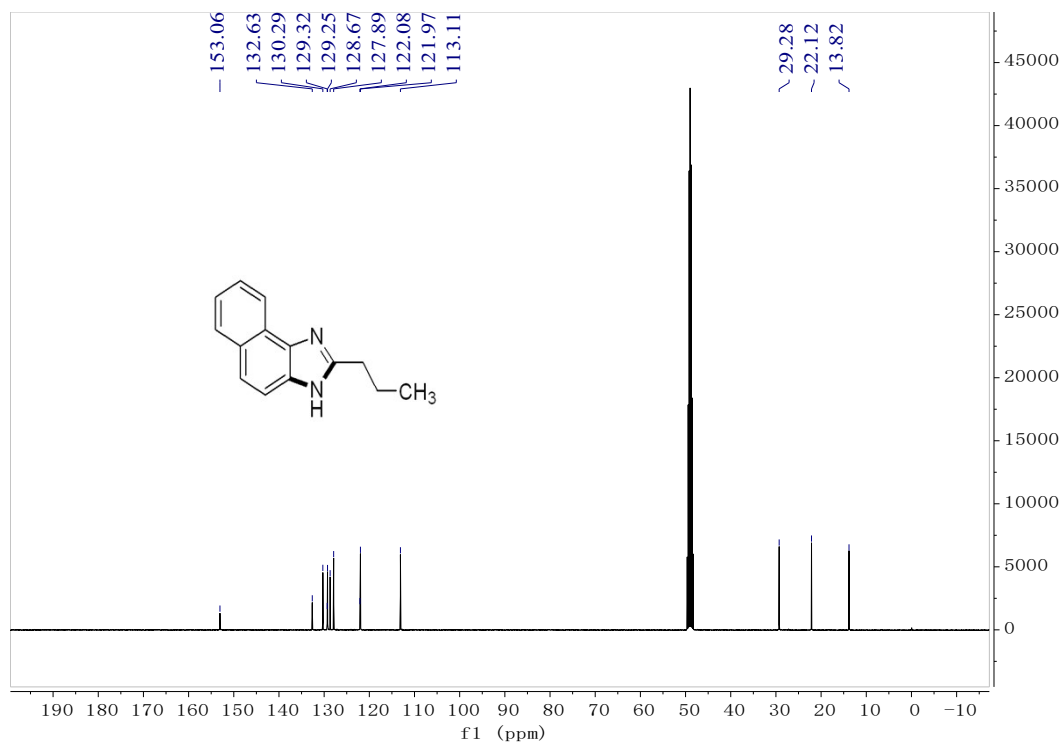

**Figure S21**  $^{13}\text{C}$  NMR of compound **2i** in  $\text{CD}_3\text{OD}$

## Benzimidazoles 2j

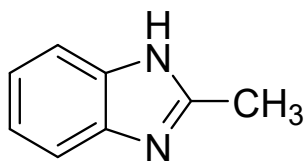

$^1\text{H NMR}$  (400 MHz,  $\text{DMSO-}d_6$ )  $\delta$  12.15 (s, 1H), 7.43 (d,  $J = 3.2$  Hz, 2H), 7.09 (dd,  $J = 5.9, 3.1$  Hz, 2H), 2.56 – 2.21 (m, 3H).

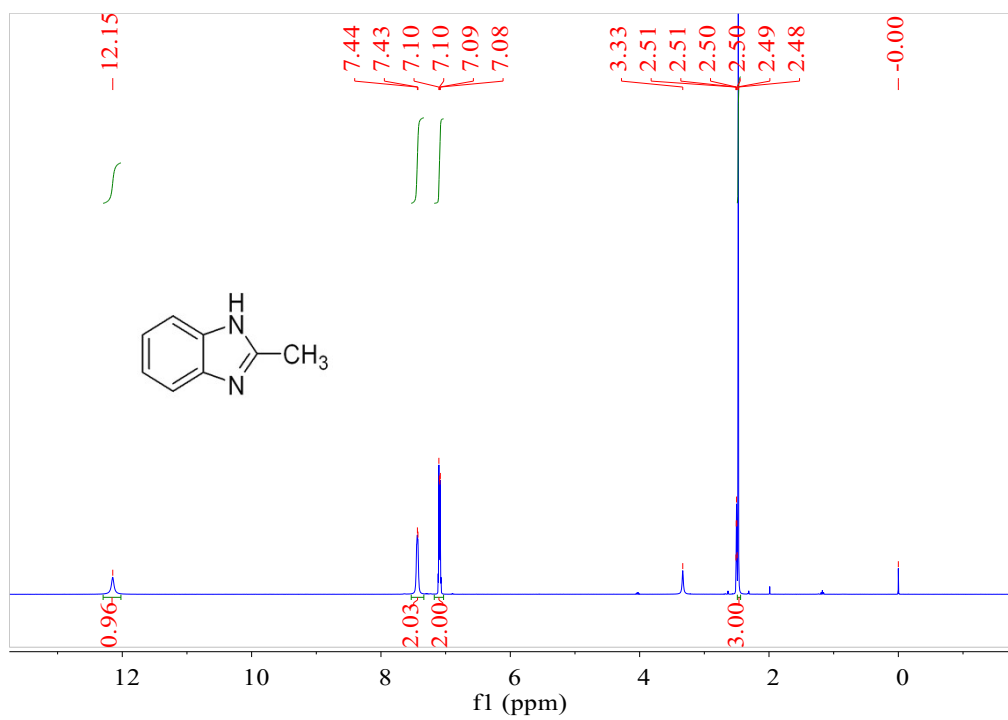

Figure S22  $^1\text{H NMR}$  of compound 2j in  $\text{DMSO-}d_6$

$^{13}\text{C}$  NMR (101 MHz, DMSO)  $\delta$  151.6, 121.4, 40.6, 40.4, 15.1; HRMS (ESI):  $m/z$   $[\text{M} + \text{H}]^+$  calcd for  $\text{C}_8\text{H}_9\text{N}_2$  133.0760

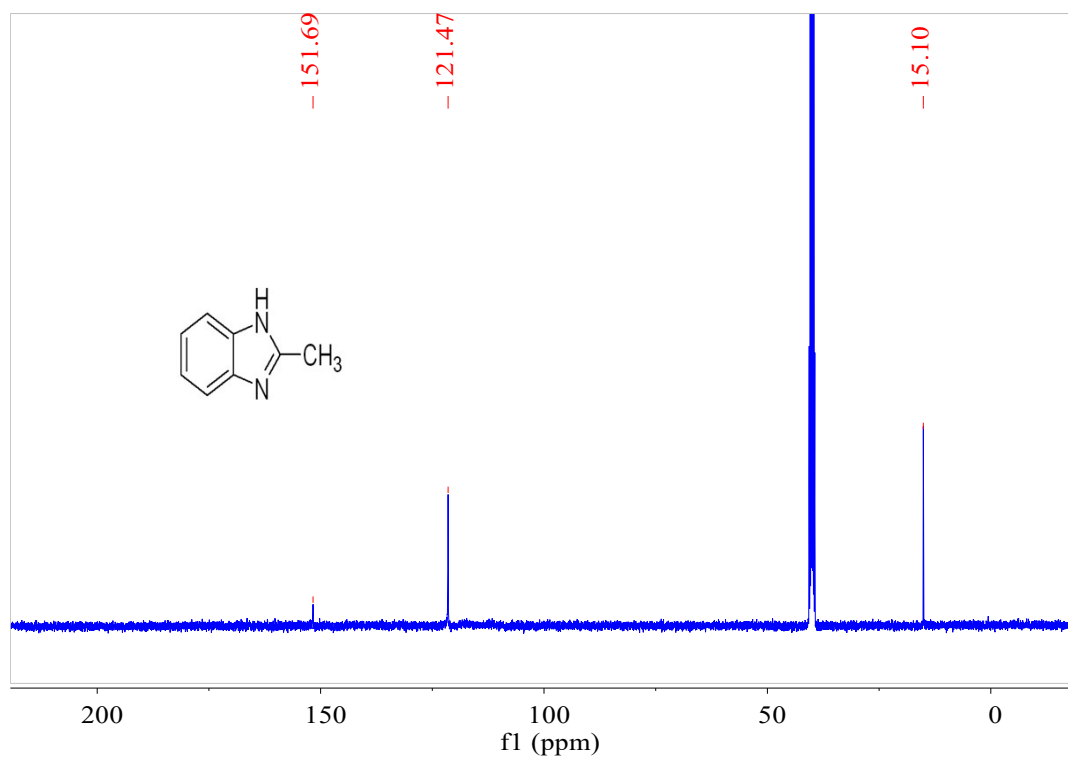

Figure S23  $^{13}\text{C}$ NMR of compound **2j** in  $\text{DMSO-}d_6$



## Benzimidazoles 2k

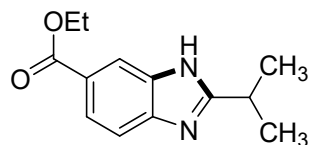

$^1\text{H}$  NMR (400 MHz,  $\text{CDCl}_3$ )  $\delta$  8.41 (d,  $J = 0.7$  Hz, 1H), 8.26 (dd,  $J = 8.6, 1.4$  Hz, 1H), 7.86 (d,  $J = 8.6$  Hz, 1H), 4.46 (q,  $J = 7.1$  Hz, 2H), 3.59 (dt,  $J = 14.0, 7.0$  Hz, 1H), 1.60 (d,  $J = 7.0$  Hz, 6H), 1.45 (t,  $J = 7.1$  Hz, 3H)

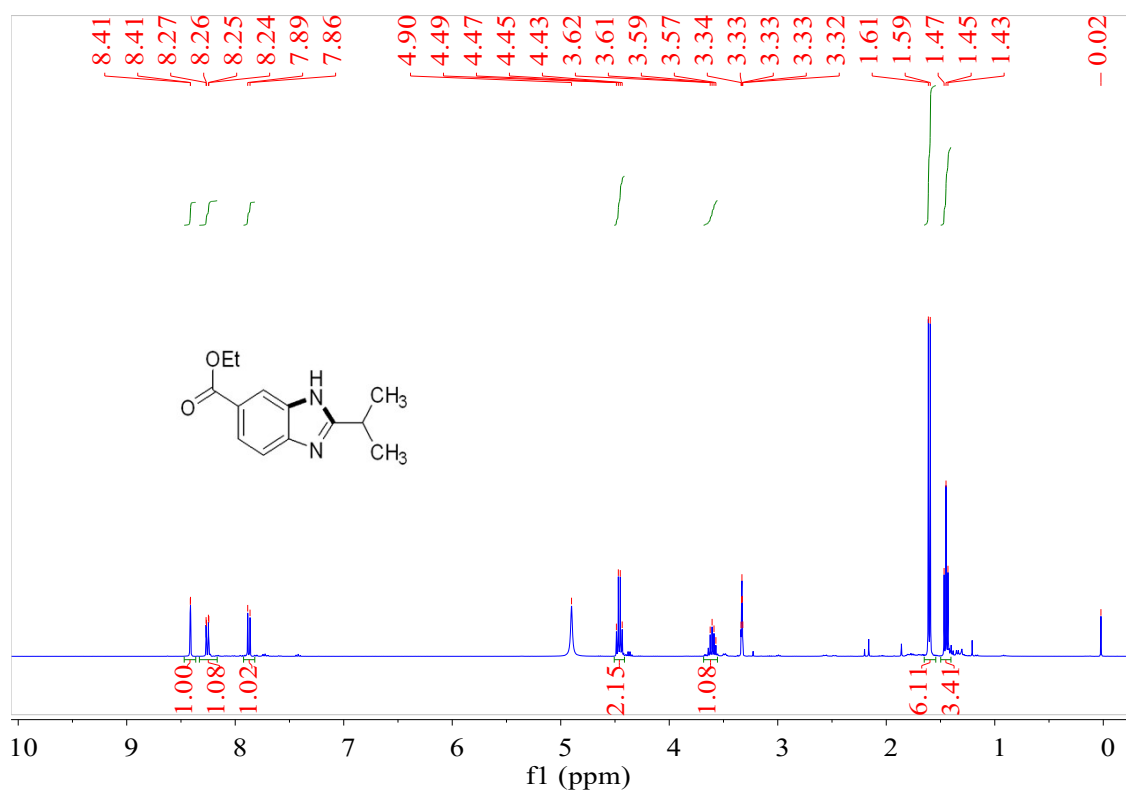

Figure S24  $^1\text{H}$ NMR of compound **2k** in  $\text{CDCl}_3$

$^{13}\text{C}\{^1\text{H}\}$  NMR (100 MHz,  $\text{CD}_3\text{OD}$ )  $\delta$  166.8, 162.5, 135.2, 132.1, 129.9, 128.2, 116.5, 114.8, 62.8, 29.1, 20.3, 14.6; HRMS (ESI):  $m/z$   $[\text{M} + \text{H}]^+$  calcd for  $\text{C}_{13}\text{H}_{17}\text{N}_2\text{O}_2$  233.1285, found: 233.1282.

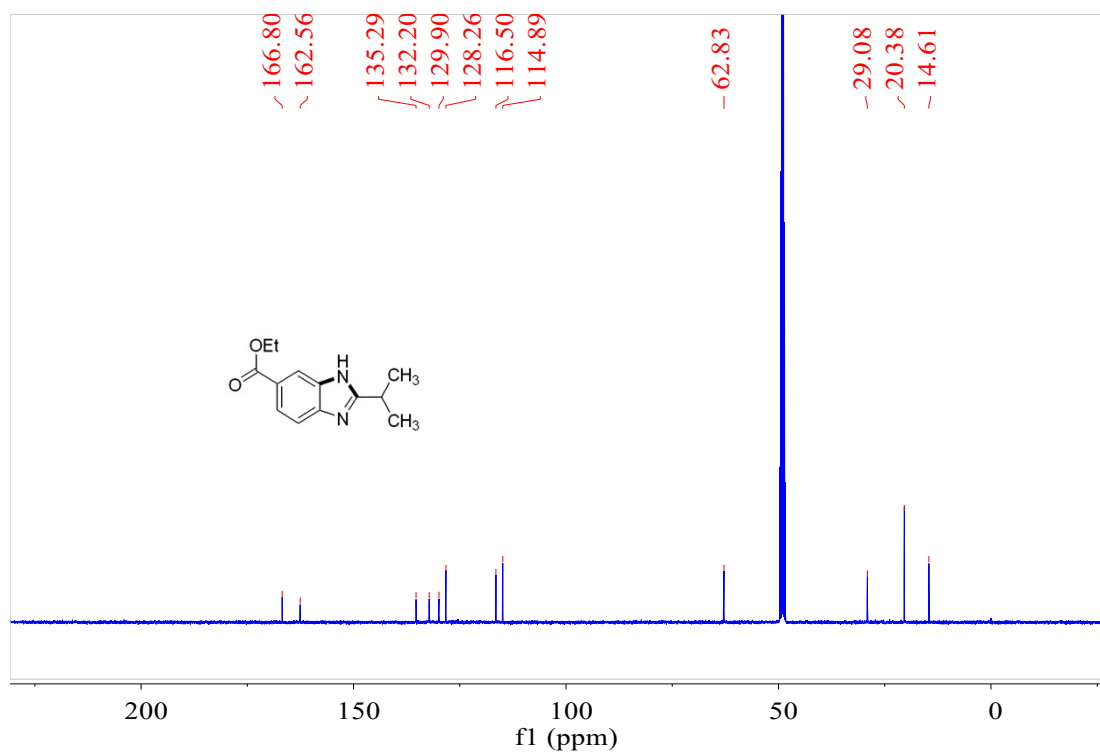

**Figure S25**  $^{13}\text{C}$ NMR of compound **2k** in  $\text{CD}_3\text{OD}$

## Benzimidazoles 2l

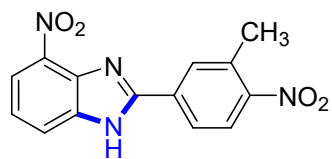

$^1\text{H NMR}$  (400 MHz,  $\text{DMSO-}d_6$ )  $\delta$  9.76 – 9.38 (s, 1H), 8.03 – 7.94 (m, 2H), 7.71 – 7.67 (m, 1H), 7.53 – 7.51 (s, 1H), 7.31 – 7.24 (m, 1H), 7.03 – 6.97 (dd,  $J = 8.1, 1.0$  Hz, 1H), 2.24 – 1.93 (s, 3H).

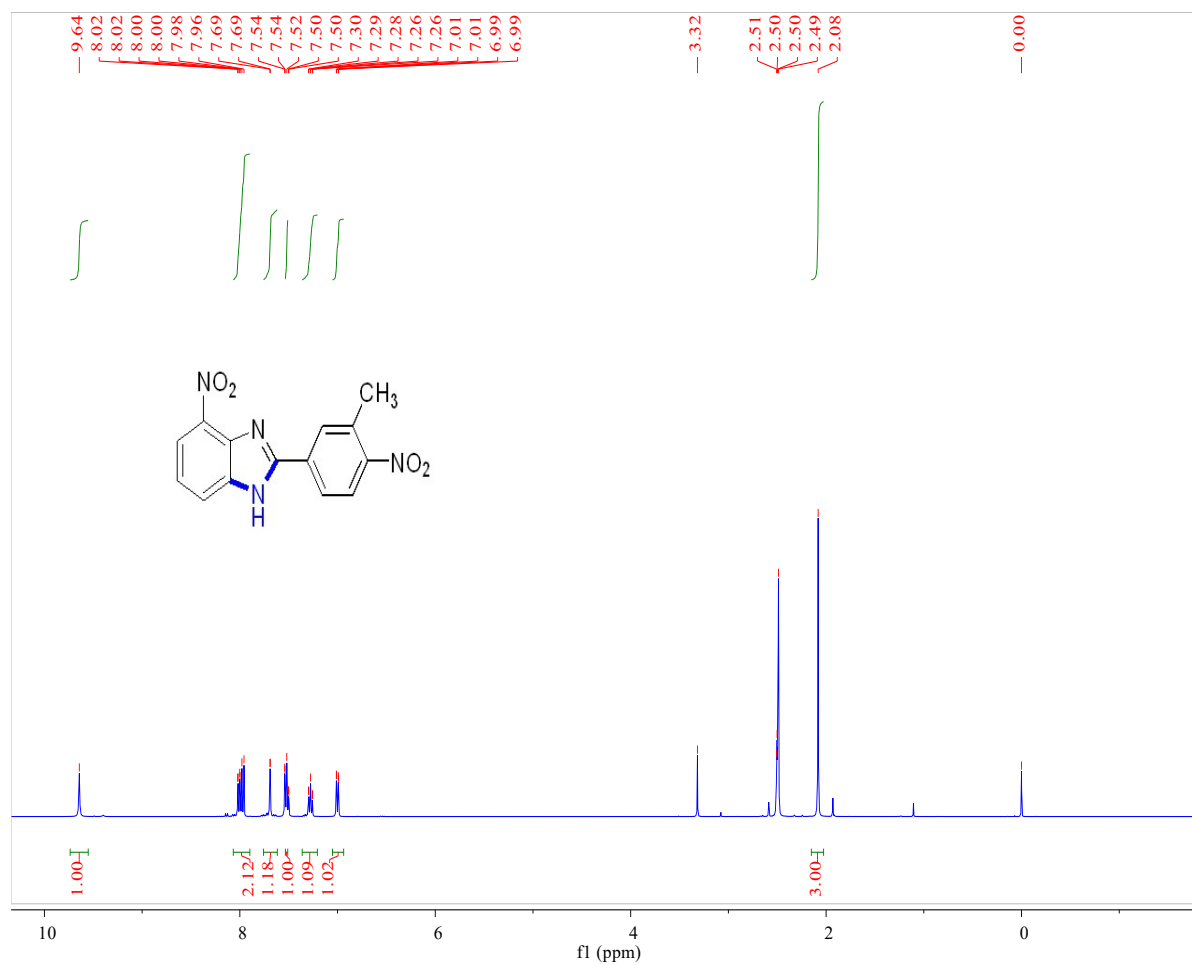

**Figure S26**  $^1\text{H NMR}$  of compound **2l** in  $\text{DMSO-}d_6$

$^{13}\text{C}\{^1\text{H}\}$  NMR (100 MHz,  $\text{DMSO-}d_6$ )  $\delta$  167.9, 152.8, 150.4, 142.1, 135., 134.5, 134.4, 133.4, 133.4, 128.1, 127.1, 125.8, 125.2, 125.1, 19.7; HRMS (ESI):  $m/z$   $[\text{M} + \text{H}]^+$  calcd for  $\text{C}_{14}\text{H}_{14}\text{N}_4\text{O}_4$  299.0775, found: 299.0772.

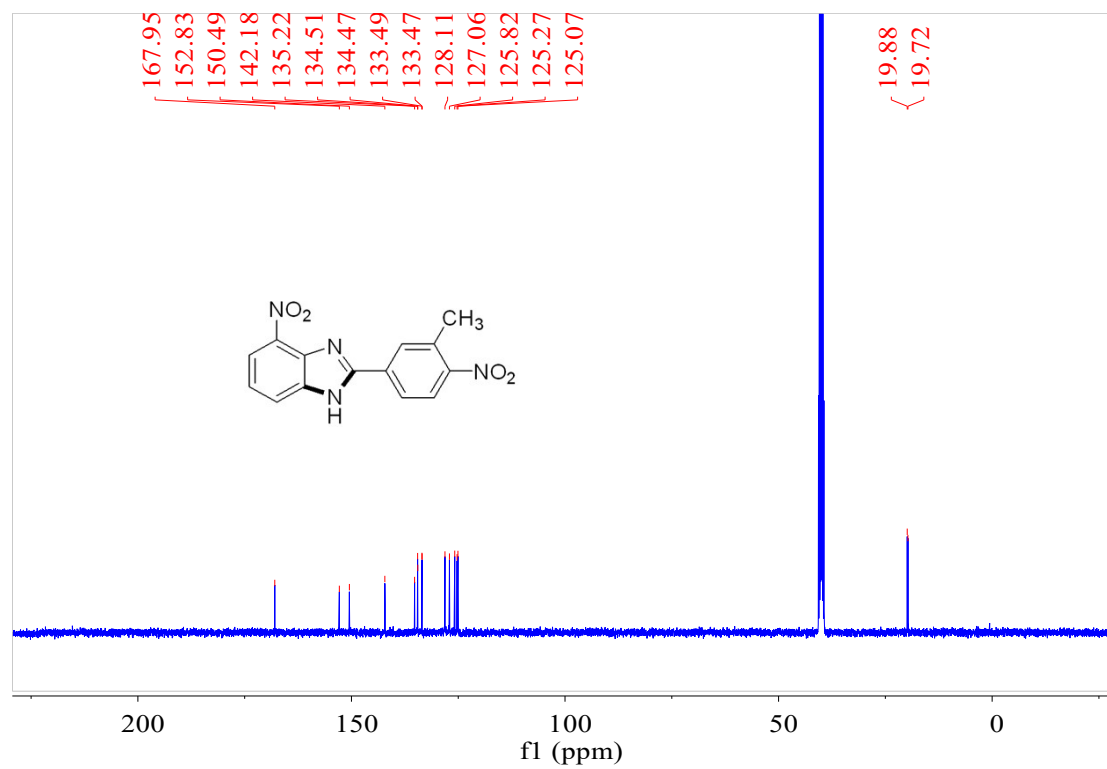

Figure S27  $^{13}\text{C}$ NMR of compound **2I** in  $\text{DMSO-}d_6$

Benzimidazoles **2m**

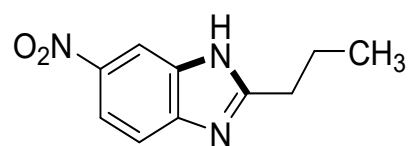

$^1\text{H}$  NMR (400 MHz,  $\text{CD}_3\text{OD}$ )  $\delta$  8.66 (d,  $J = 1.9$  Hz, 1H), 8.46 (dd,  $J = 9.0, 2.1$  Hz, 1H), 7.97 (d,  $J = 9.0$  Hz, 1H), 3.28 – 3.20 (m, 2H), 2.07 – 1.95 (m, 2H), 1.12 (t,  $J = 7.4$  Hz, 3H).

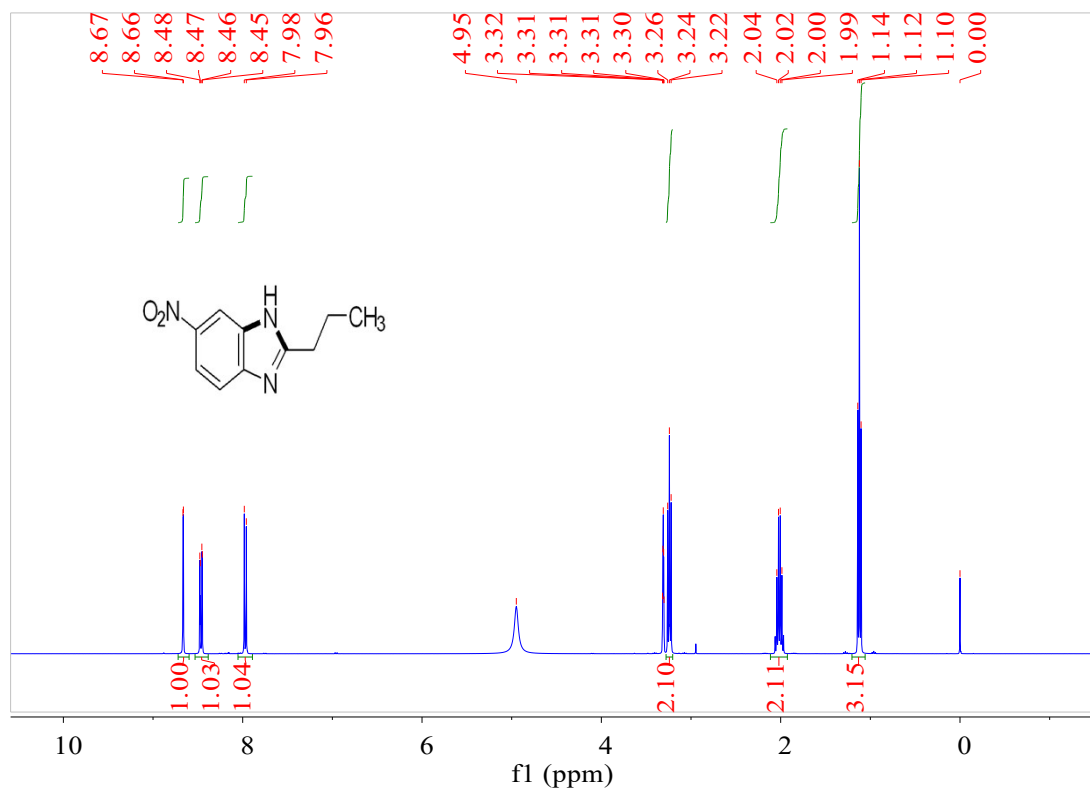

Figure S28  $^1\text{H}$ NMR of compound **2m** in  $\text{CD}_3\text{OD}$

$^{13}\text{C}\{^1\text{H}\}$  NMR (100 MHz,  $\text{CD}_3\text{OD}$ )  $\delta$  158.8, 145.8, 134.8, 130.7, 121.1, 114.3, 110.1, 28.3, 20.1, 12.3; HRMS (ESI):  $m/z$   $[\text{M} + \text{H}]^+$  calcd for  $\text{C}_{10}\text{H}_{12}\text{N}_3\text{O}_2$  206.0924, found: 206.0921.

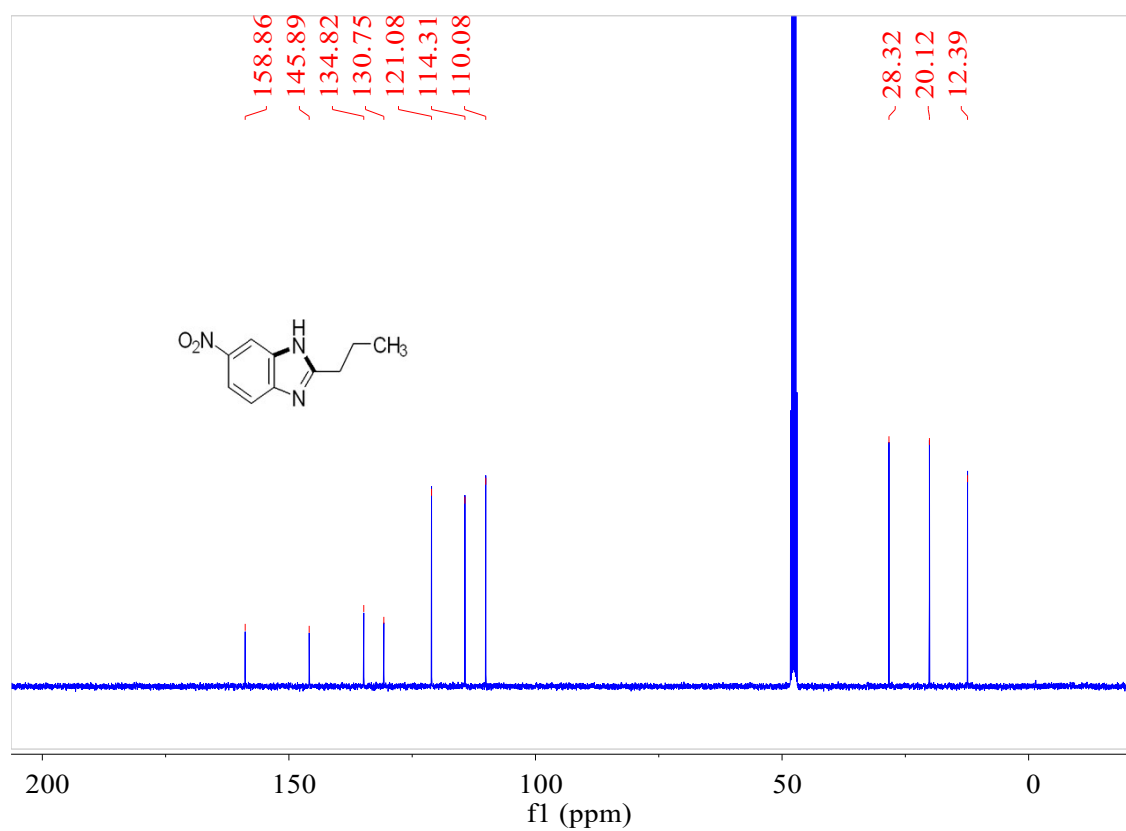

**Figure S29**  $^{13}\text{C}$ NMR of compound **2m** in  $\text{CD}_3\text{OD}$

### Benzimidazoles 2n

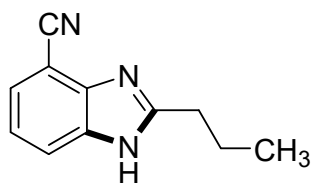

$^1\text{H NMR}$  (400 MHz,  $\text{CD}_3\text{OD}$ )  $\delta$  8.12 (d,  $J = 8.3$  Hz, 1H), 8.02 (d,  $J = 7.7$  Hz, 1H), 7.75 (t,  $J = 8.0$  Hz, 1H), 3.24 (t,  $J = 7.7$  Hz, 2H), 2.12 – 1.93 (m, 2H), 1.13 (t,  $J = 7.4$  Hz, 3H).

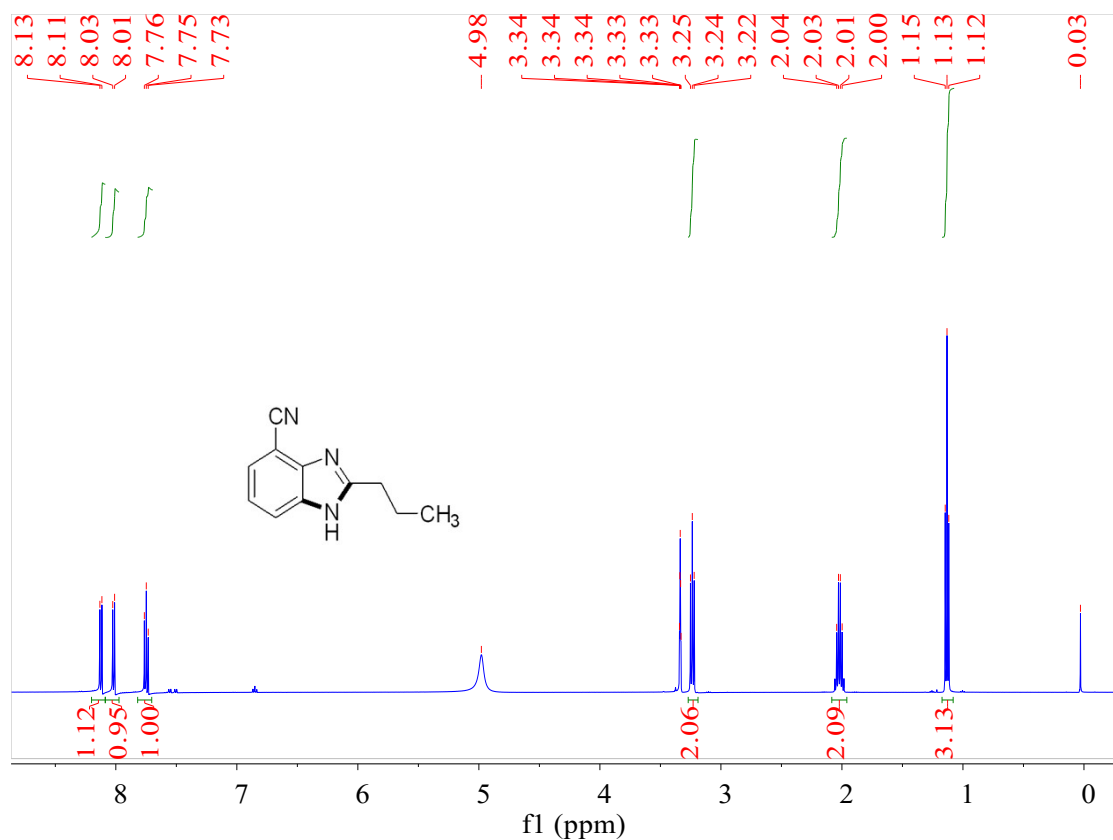

**Figure S30**  $^1\text{H NMR}$  of compound **2n** in  $\text{CD}_3\text{OD}$

$^{13}\text{C}\{^1\text{H}\}$  NMR (100 MHz,  $\text{CD}_3\text{OD}$ )  $\delta$  157.0, 131.8, 131.6, 130.5, 126.1, 118.7, 113.9, 97.9, 28.1, 20.4, 12.4; HRMS (ESI):  $m/z$   $[\text{M} + \text{H}]^+$  calcd for  $\text{C}_{11}\text{H}_{12}\text{N}_3$  186.1026, found: 186.1024.

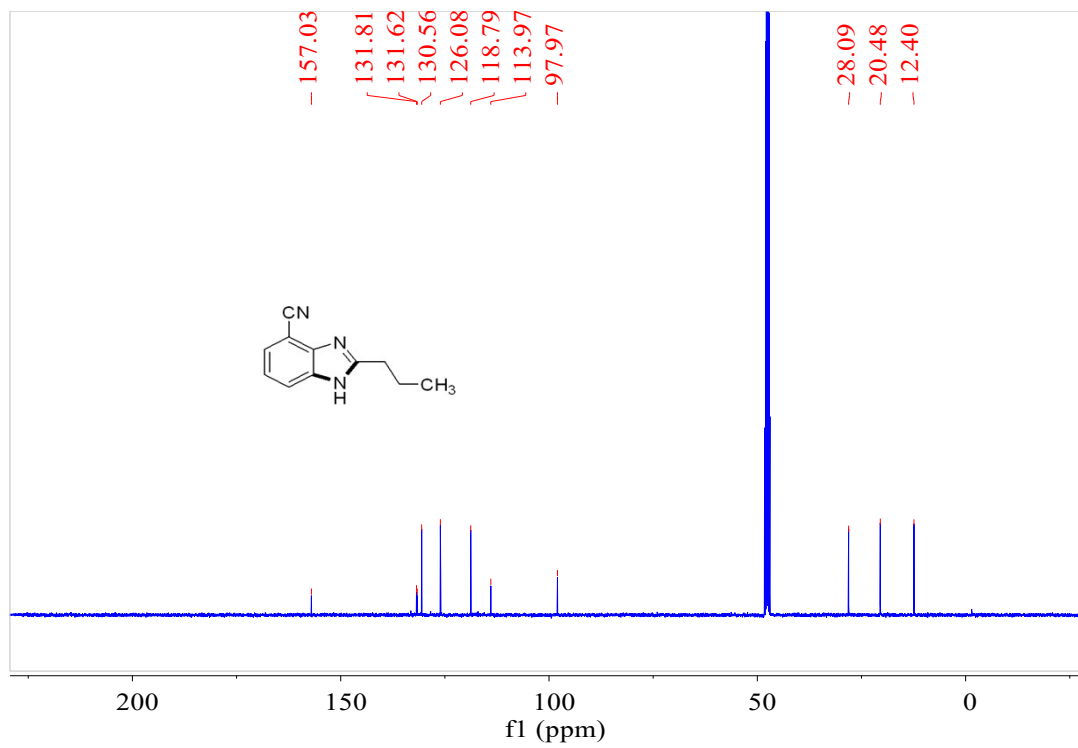

**Figure S31**  $^{13}\text{C}$ NMR of compound **2n** in  $\text{CD}_3\text{OD}$



### Benzimidazoles 2o

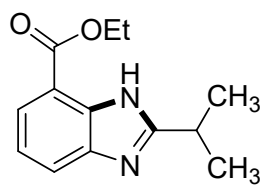

**2o**  $^1\text{H}$  NMR (400 MHz,  $\text{CD}_3\text{OD}$ )  $\delta$  8.22 (d,  $J = 7.7$  Hz, 1H), 8.04 (d,  $J = 8.1$  Hz, 1H), 7.76 – 7.68 (m, 1H), 4.57 (q,  $J = 7.1$  Hz, 1H), 3.72 (dd,  $J = 14.0, 7.0$  Hz, 1H), 1.59 (d,  $J = 7.0$  Hz, 1H), 1.48 (t,  $J = 7.1$  Hz, 1H)

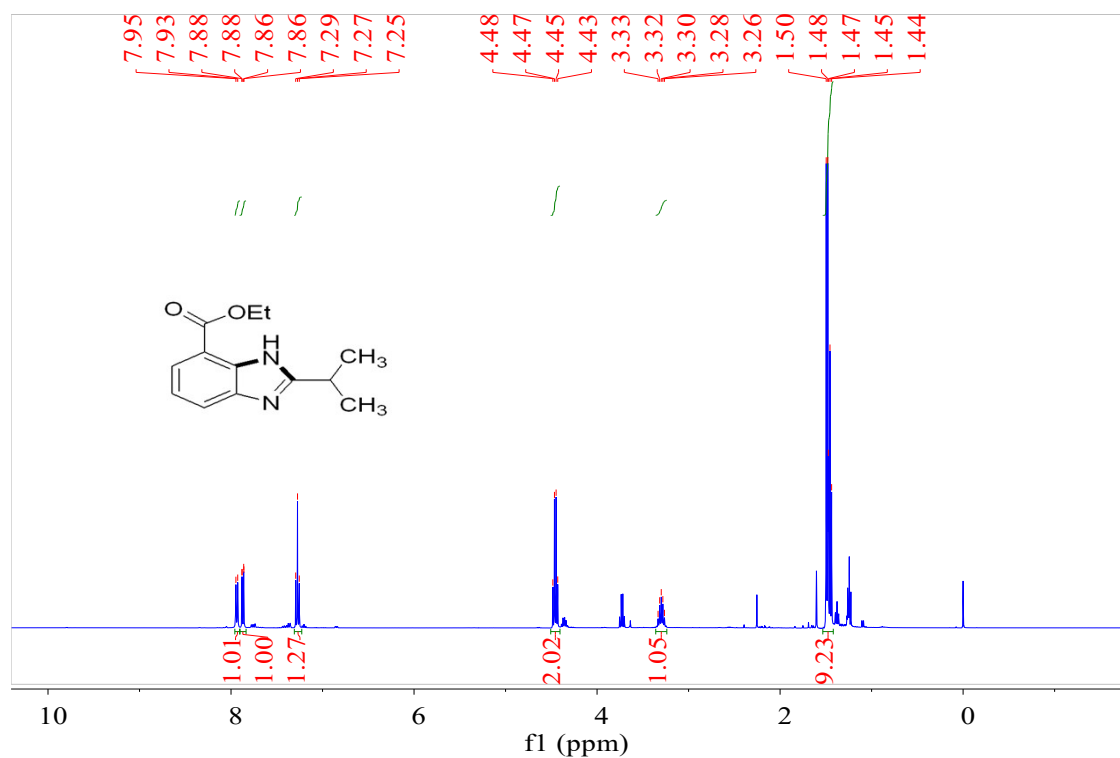

Figure S32  $^1\text{H}$ NMR of compound **2o** in  $\text{CD}_3\text{OD}$

$^{13}\text{C}\{^1\text{H}\}$  NMR (100 MHz,  $\text{CD}_3\text{OD}$ )  $\delta$  165.8, 162.5, 134.8, 131.8, 128.3, 126.4, 120.4, 117.9, 62.9, 28.8, 21.0, 14.7; HRMS (ESI):  $m/z$   $[\text{M} + \text{H}]^+$  calcd for  $\text{C}_{13}\text{H}_{17}\text{N}_2\text{O}_2$  233.1285, found: 233.1283.

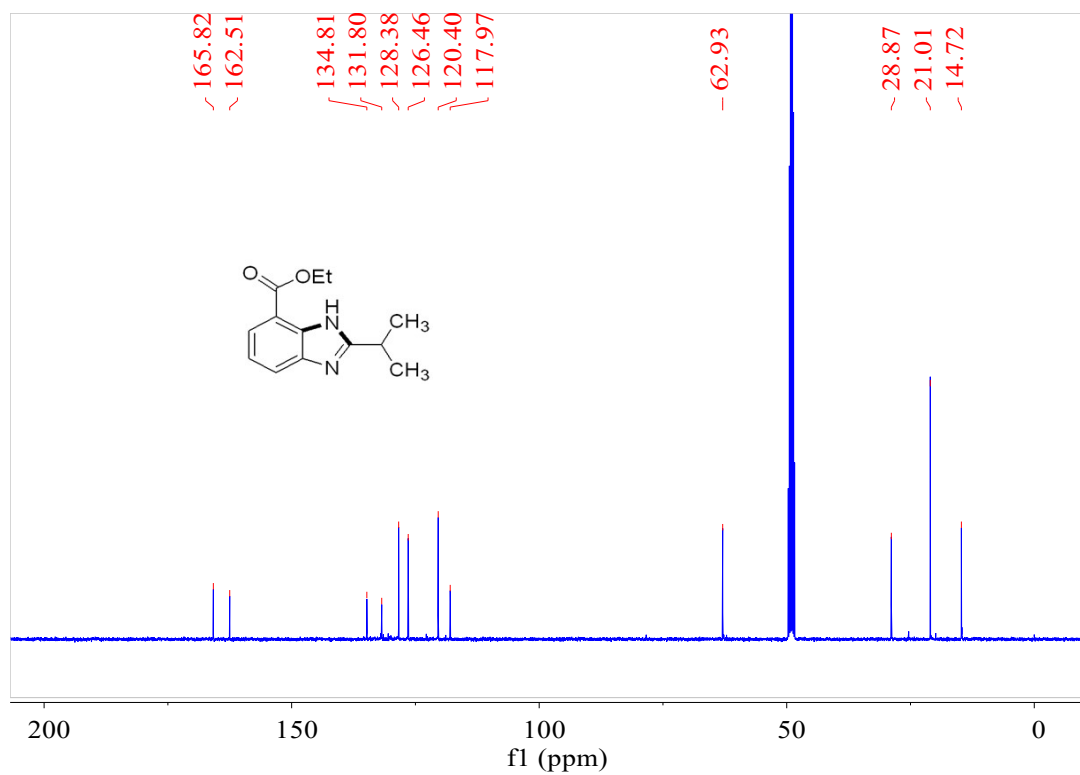

**Figure S33**  $^{13}\text{C}$ NMR of compound **2o** in  $\text{CD}_3\text{OD}$

## Benzimidazoles 2p

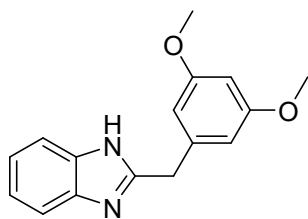

$^1\text{H NMR}$  (400 MHz,  $\text{CDCl}_3$ )  $\delta$  7.52 (s, 2H), 7.21 (dd,  $J = 6.0, 3.2$  Hz, 2H), 6.44 (d,  $J = 2.1$  Hz, 2H), 6.37 (d,  $J = 2.1$  Hz, 1H), 4.21 (s, 6H), 3.73 (s, 3H).

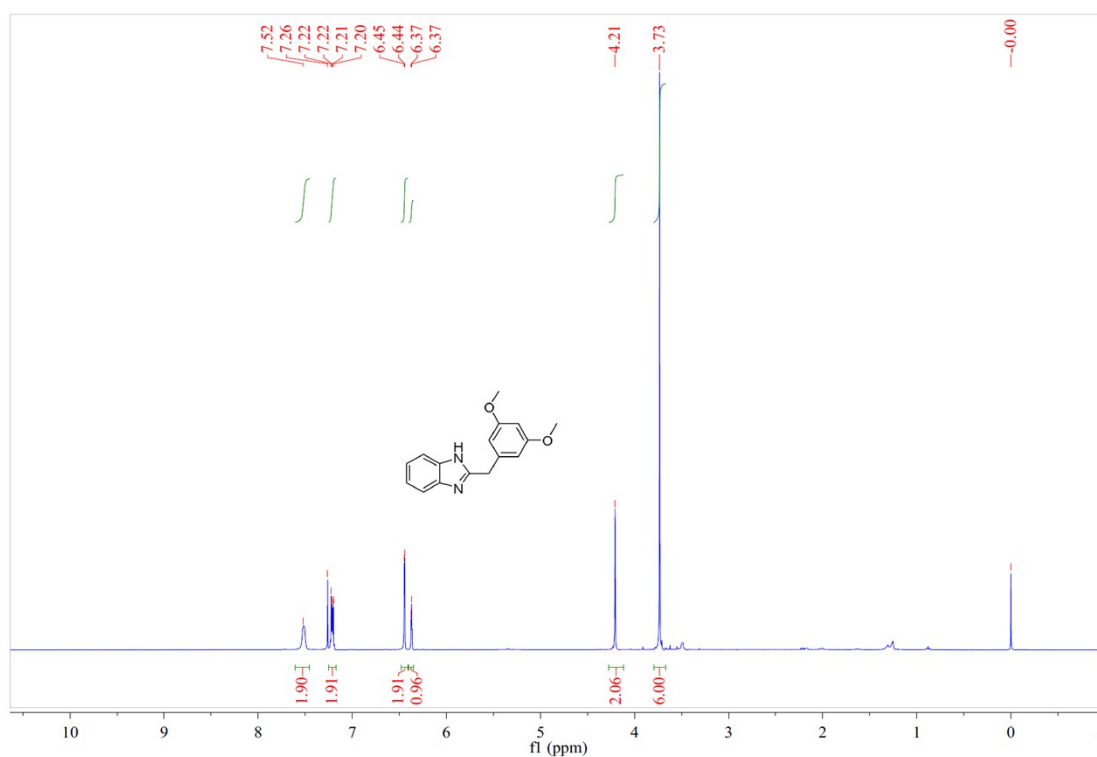

**Figure S34**  $^1\text{H NMR}$  of compound **2p** in  $\text{CDCl}_3$

$^{13}\text{C}$  NMR (101 MHz,  $\text{CDCl}_3$ )  $\delta$  161.3, 153.0, 138.3, 122.4, 107.1, 99.2, 55.3, 36.2; HRMS (ESI):  
 $m/z$   $[\text{M} + \text{H}]^+$  calcd for  $\text{C}_{16}\text{H}_{17}\text{N}_2\text{O}_2$  269.1285

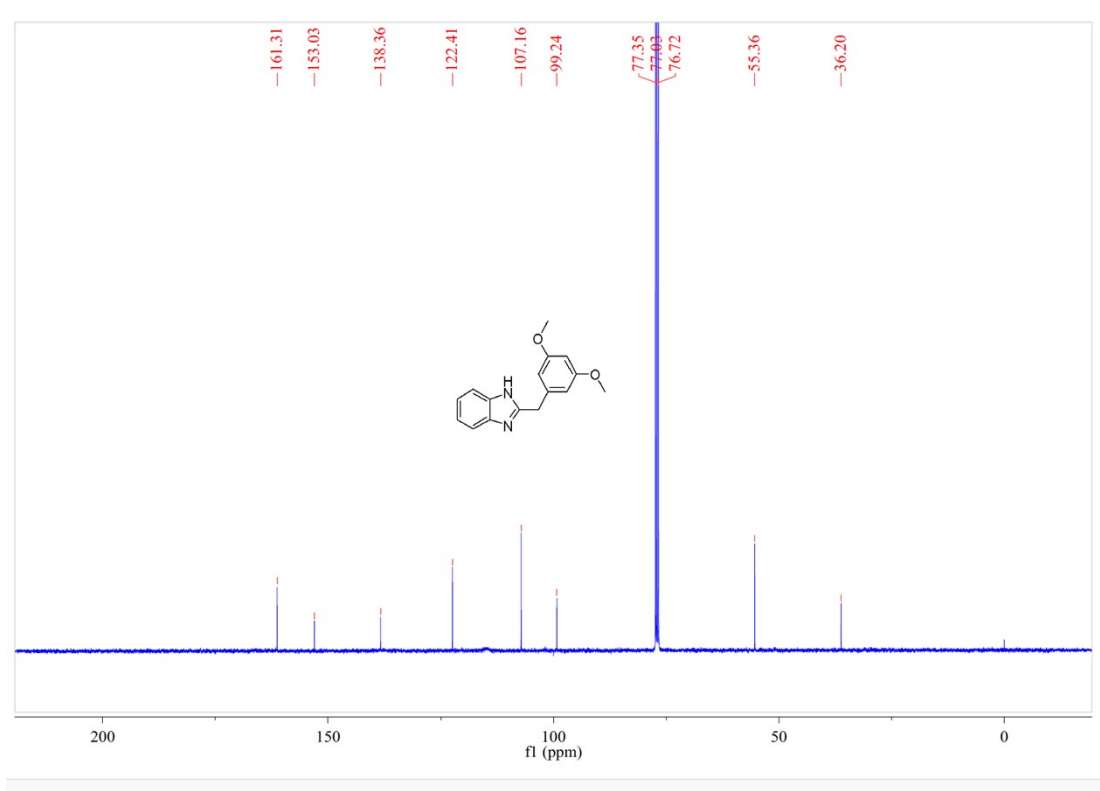

**Figure S35**  $^{13}\text{C}$ NMR of compound **2p** in  $\text{CDCl}_3$

### Benzimidazoles 2q

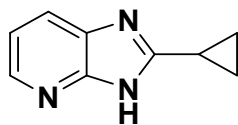

$^1\text{H NMR}$  (400 MHz,  $\text{CD}_3\text{OD}$ )  $\delta$  8.24 (d,  $J = 4.4$  Hz, 1H), 7.83 (dd,  $J = 8.0, 1.3$  Hz, 1H), 7.21 (dd,  $J = 8.0, 4.9$  Hz, 1H), 2.19 (s, 0H), 1.43 – 1.03 (m, 4H).

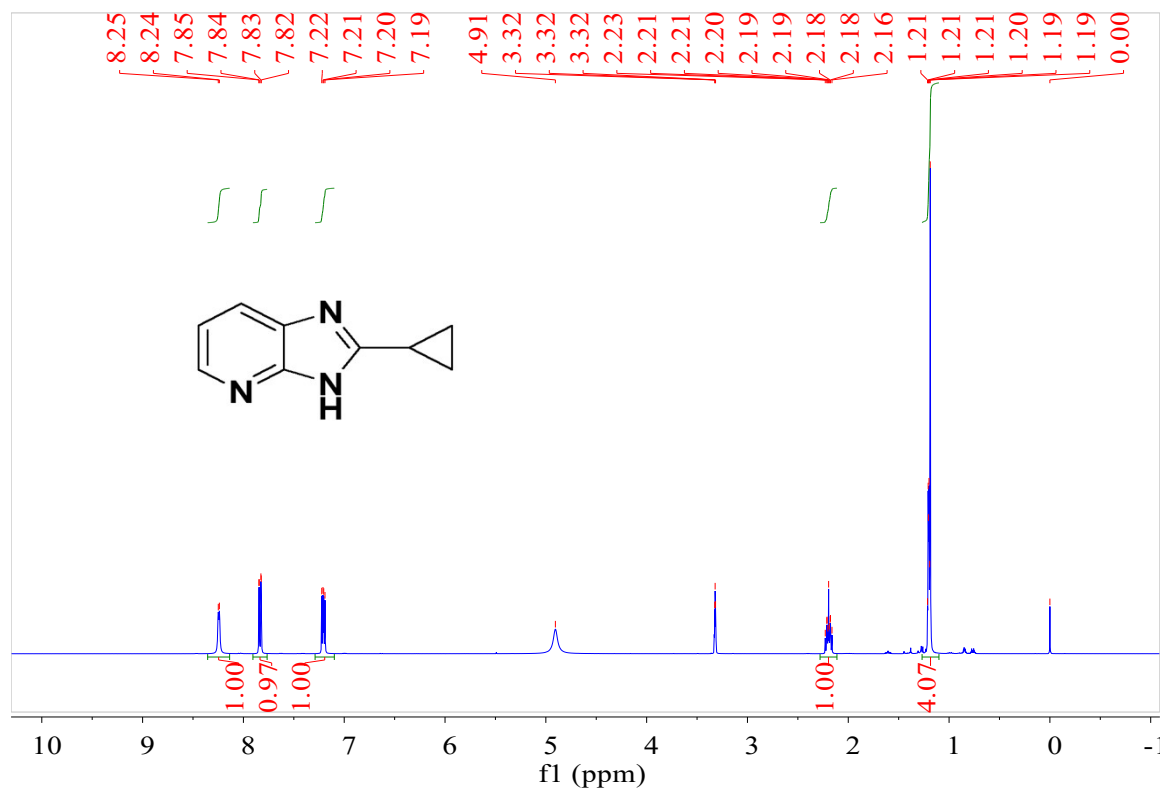

Figure S36  $^1\text{H NMR}$  of compound 2q in  $\text{CD}_3\text{OD}$

$^{13}\text{C}$  NMR (101 MHz,  $\text{CD}_3\text{OD}$ )  $\delta$  160.4, 151.6, 142.4, 130.7, 121.8, 117.5, 9.2, 8.4; HRMS (ESI):

$m/z$   $[\text{M} + \text{H}]^+$  calcd for  $\text{C}_9\text{H}_{10}\text{N}_3$  160.0869

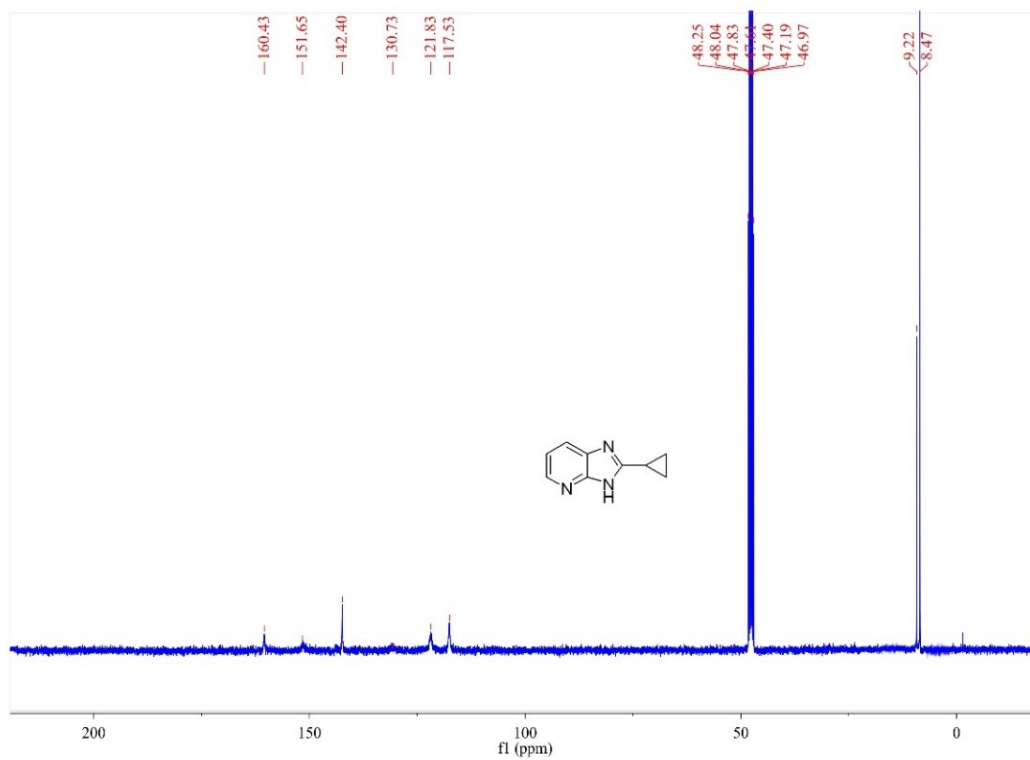

**Figure S37**  $^1\text{H}$ NMR of compound **2q** in  $\text{CD}_3\text{OD}$

### Benzimidazoles 2r

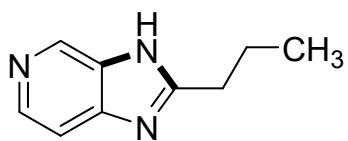

$^1\text{H NMR}$  (400 MHz,  $\text{CD}_3\text{OD}$ )  $\delta$  8.62 (dd,  $J = 5.2, 1.2$  Hz, 1H), 8.33 (dd,  $J = 8.2, 1.3$  Hz, 1H), 7.66 (dd,  $J = 8.2, 5.2$  Hz, 1H), 3.16 (t,  $J = 7.6$  Hz, 2H), 1.98 (q,  $J = 7.5$  Hz, 2H), 1.09 (t,  $J = 7.4$  Hz, 3H).

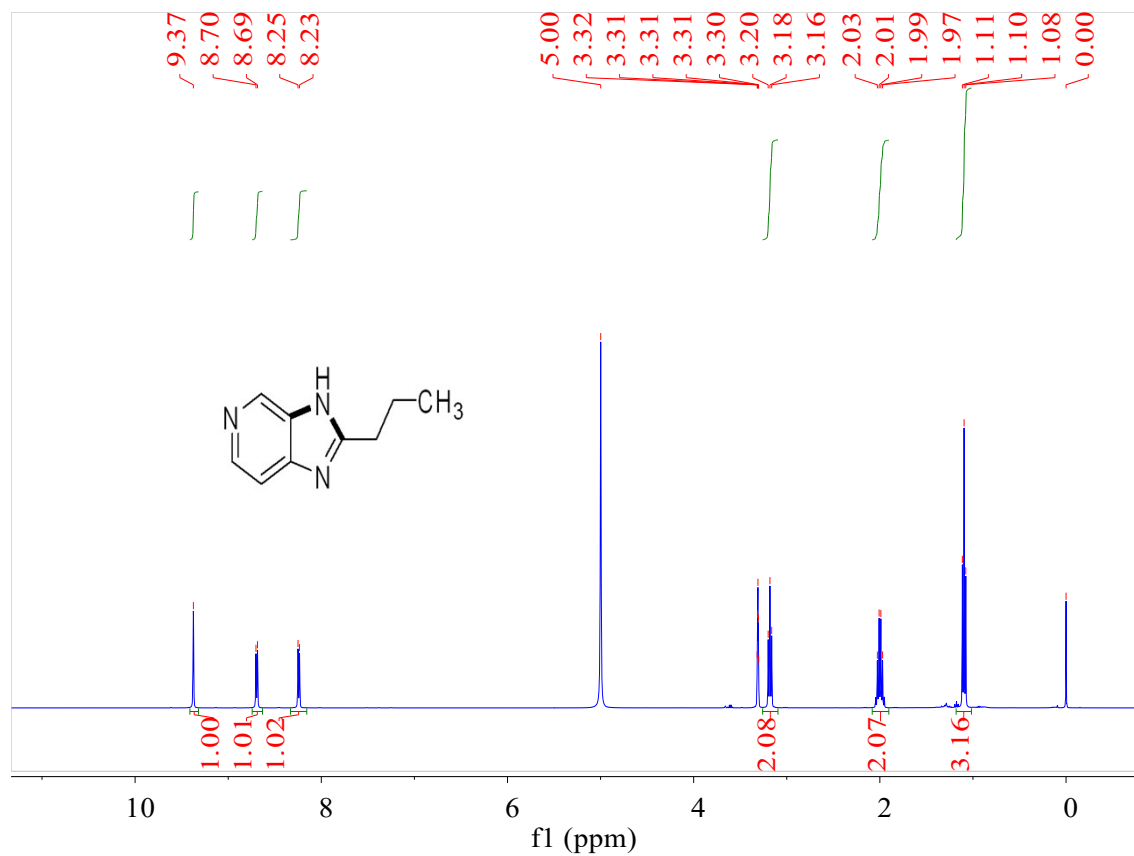

Figure S38  $^1\text{H NMR}$  of compound 2r in  $\text{CD}_3\text{OD}$

$^{13}\text{C}$  NMR (101 MHz,  $\text{CD}_3\text{OD}$ )  $\delta$  164.7, 145.0, 135.1, 134.6, 131.5, 111.2, 29.8, 20.4, 12.5; HRMS

(ESI):  $m/z$   $[\text{M} + \text{H}]^+$  calcd for  $\text{C}_9\text{H}_{12}\text{N}_3$  162.1026.

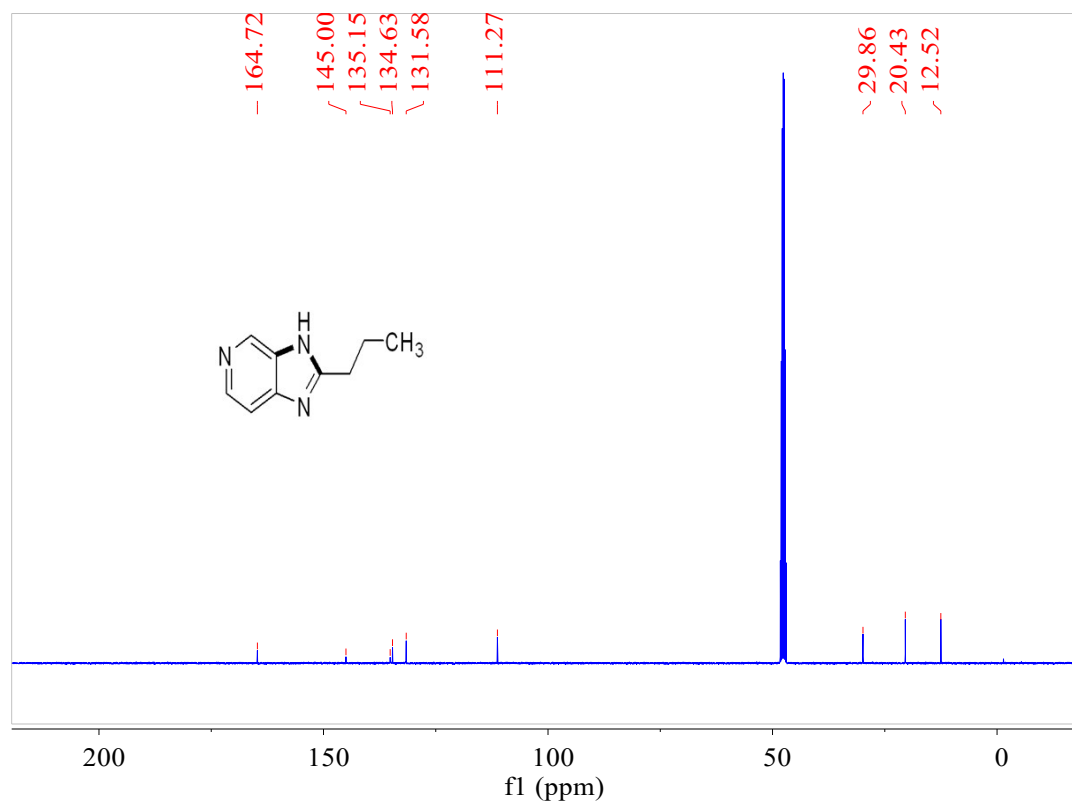

**Figure S39**  $^{13}\text{C}$ NMR of compound **2r** in  $\text{CD}_3\text{OD}$



### Benzimidazoles 2s

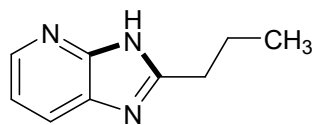

$^1\text{H}$  NMR (400 MHz,  $\text{CD}_3\text{OD}$ )  $\delta$  8.62 (dd,  $J = 5.2, 1.2$  Hz, 1H), 8.33 (dd,  $J = 8.2, 1.3$  Hz, 1H), 7.66 (dd,  $J = 8.2, 5.2$  Hz, 1H), 3.16 (t,  $J = 7.6$  Hz, 2H), 1.98 (q,  $J = 7.5$  Hz, 2H), 1.09 (t,  $J = 7.4$  Hz, 3H).

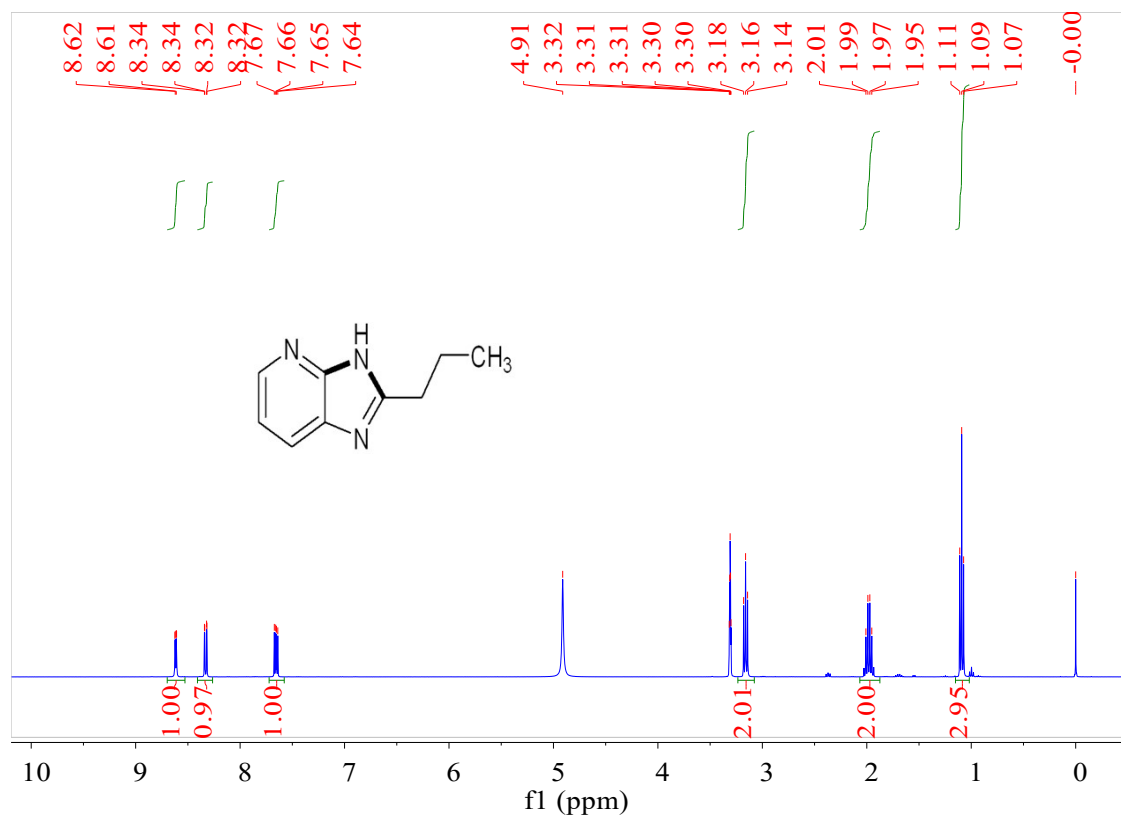

Figure S40  $^1\text{H}$ NMR of compound 2s in  $\text{CD}_3\text{OD}$

$^{13}\text{C}$  NMR (101 MHz,  $\text{CD}_3\text{OD}$ )  $\delta$  160.5, 147.0, 144.8, 127.5, 125.6, 121.8, 30.4, 21.7, 13.8; HRMS

(ESI):  $m/z$   $[\text{M} + \text{H}]^+$  calcd for  $\text{C}_9\text{H}_{11}\text{N}_3$  235.1077, found: 162.1023.

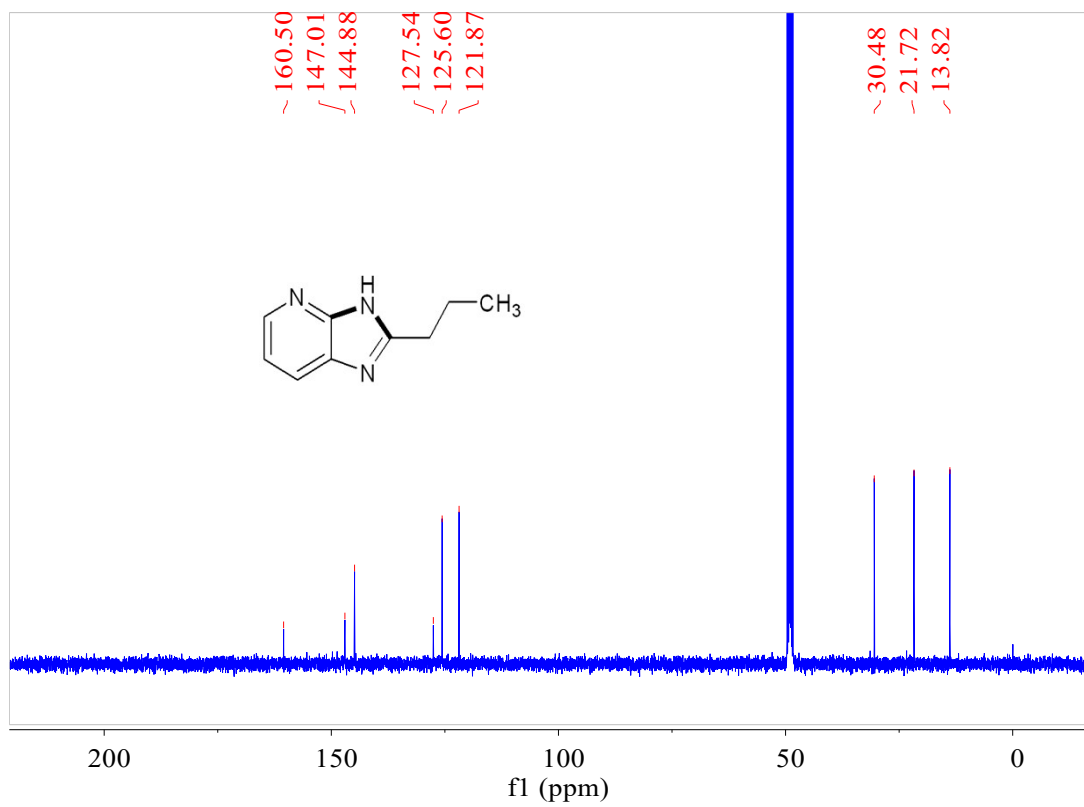

**Figure S41**  $^{13}\text{C}$  NMR of compound **2s** in  $\text{CD}_3\text{OD}$

### Benzimidazoles 2t

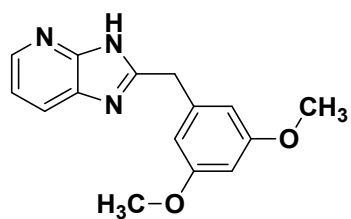

$^1\text{H NMR}$  (400 MHz,  $\text{CD}_3\text{OD}$ )  $\delta$  8.30 (s, 1H), 7.91 (s, 1H), 7.25 (dd,  $J = 7.9, 4.9$  Hz, 1H), 6.51 (d,  $J = 1.7$  Hz, 2H), 6.37 (s, 1H), 4.86 (s, 3H), 4.19 (s, 2H), 3.74 (s, 6H), 3.31 (s, 3H).

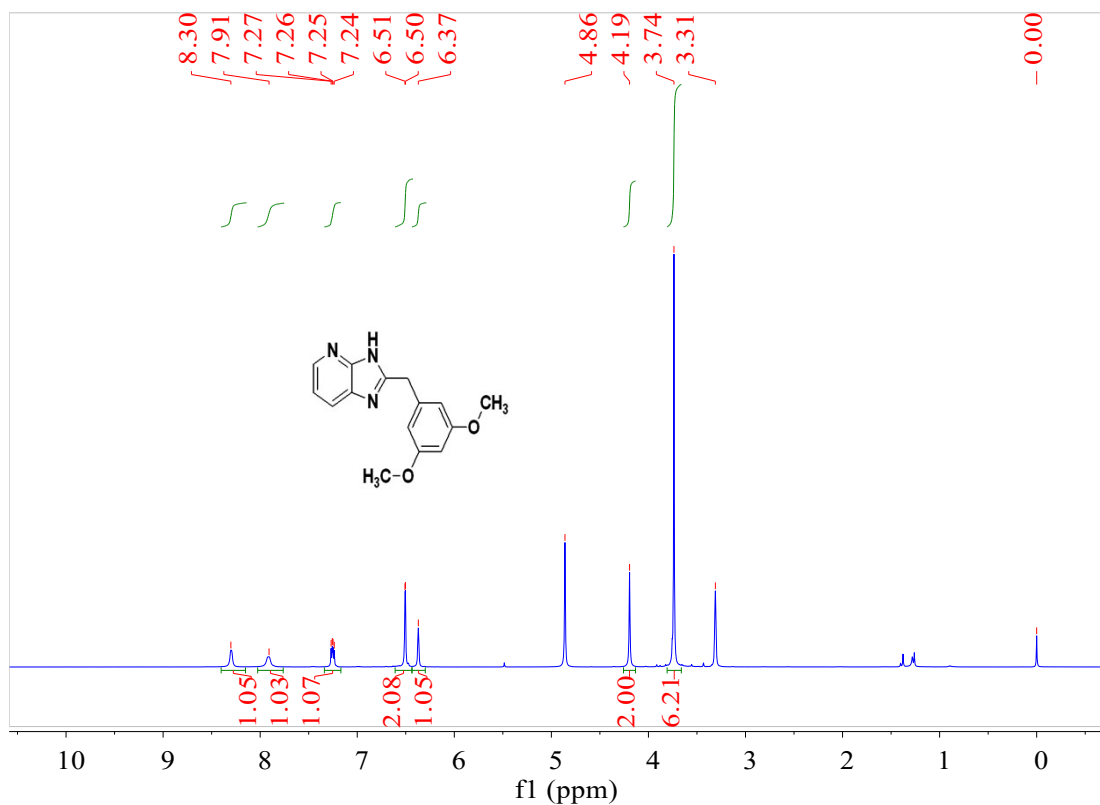

Figure S42  $^1\text{H NMR}$  of compound **2t** in  $\text{CD}_3\text{OD}$

$^{13}\text{C}$  NMR (101 MHz,  $\text{CD}_3\text{OD}$ )  $\delta$  162.7, 144.5, 139.6, 119.4, 107.9, 100.0, 55.7, 36.6. HRMS (ESI):  
 $m/z$   $[\text{M} + \text{H}]^+$  calcd for  $\text{C}_{15}\text{H}_{16}\text{N}_3\text{O}_2$  270.1237.

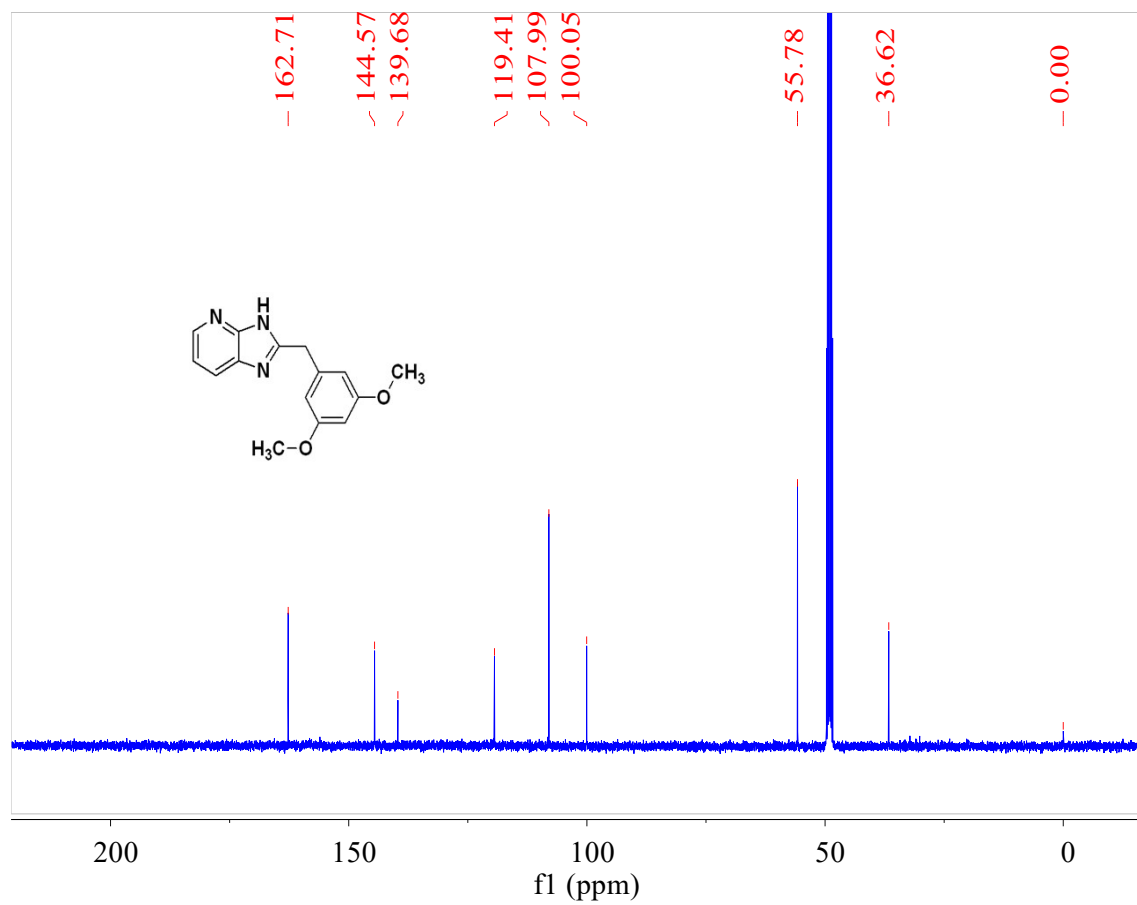

**Figure S43**  $^{13}\text{C}$ NMR of compound **2t** in  $\text{CD}_3\text{OD}$

## Benzimidazoles 2u

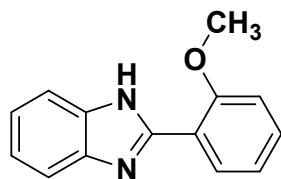

$^1\text{H NMR}$  (400 MHz,  $\text{CD}_3\text{OD}$ )  $\delta$  8.24 (dd,  $J = 7.8, 1.7$  Hz, 1H), 7.64 (dd,  $J = 6.0, 3.2$  Hz, 2H), 7.47 (ddd,  $J = 8.7, 7.5, 1.7$  Hz, 1H), 7.24 (dd,  $J = 6.1, 3.2$  Hz, 2H), 7.19 (d,  $J = 8.3$  Hz, 1H), 7.15 – 7.08 (m, 1H), 4.05 (s, 3H).

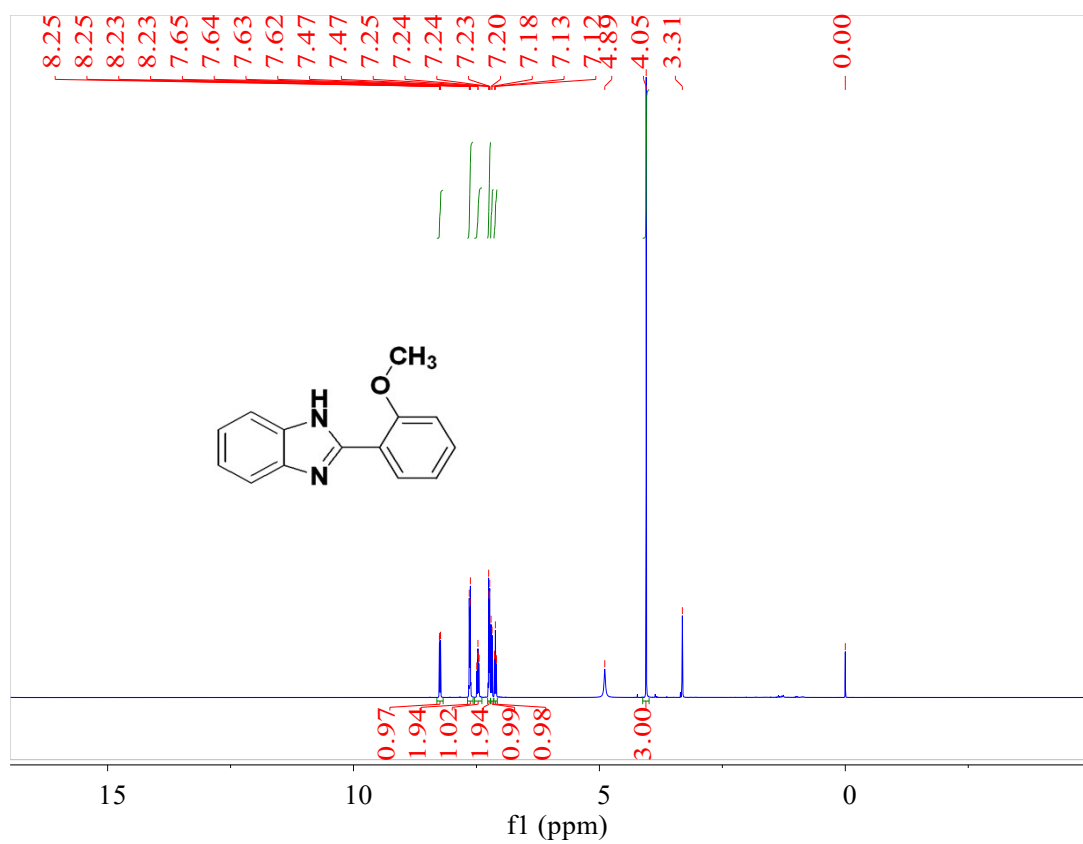

Figure S44  $^1\text{H NMR}$  of compound 2u in  $\text{CD}_3\text{OD}$

$^{13}\text{C}$  NMR (101 MHz,  $\text{CD}_3\text{OD}$ )  $\delta$  157.3, 149.6, 138.1, 131.4, 129.5, 122.2, 120.7, 117.5, 114.4, 111.4, 54.8. HRMS (ESI):  $m/z$   $[\text{M} + \text{H}]^+$  calcd for  $\text{C}_{14}\text{H}_{13}\text{N}_2\text{O}$  225.1022

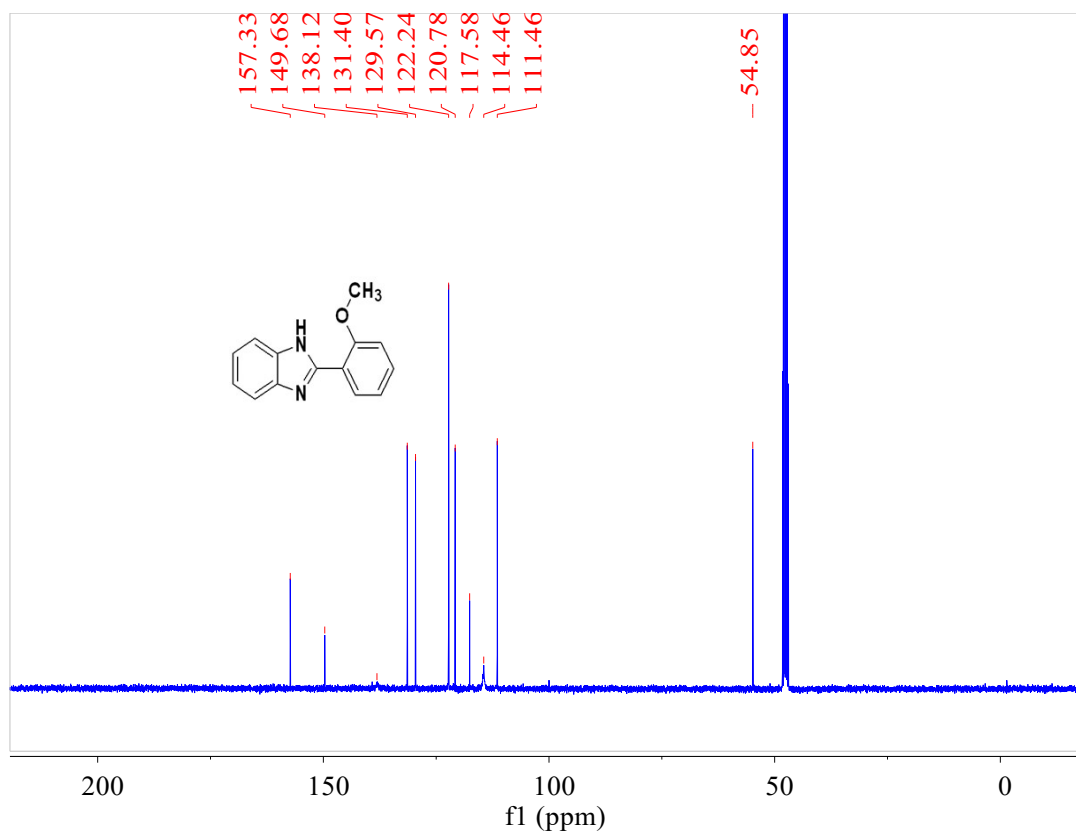

**Figure S45**  $^{13}\text{C}$ NMR of compound **2u** in  $\text{CD}_3\text{OD}$

### Benzimidazoles 2v

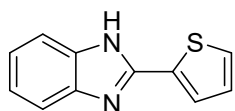

$^1\text{H NMR}$  (400 MHz,  $\text{CD}_3\text{OD}$ )  $\delta$  8.20 (dd,  $J = 3.9, 1.1$  Hz, 1H), 8.11 (dd,  $J = 5.0, 1.1$  Hz, 1H), 7.78 (dt,  $J = 6.8, 3.4$  Hz, 2H), 7.60 (dt,  $J = 6.2, 3.4$  Hz, 2H), 7.43 (dd,  $J = 4.9, 3.9$  Hz, 1H).

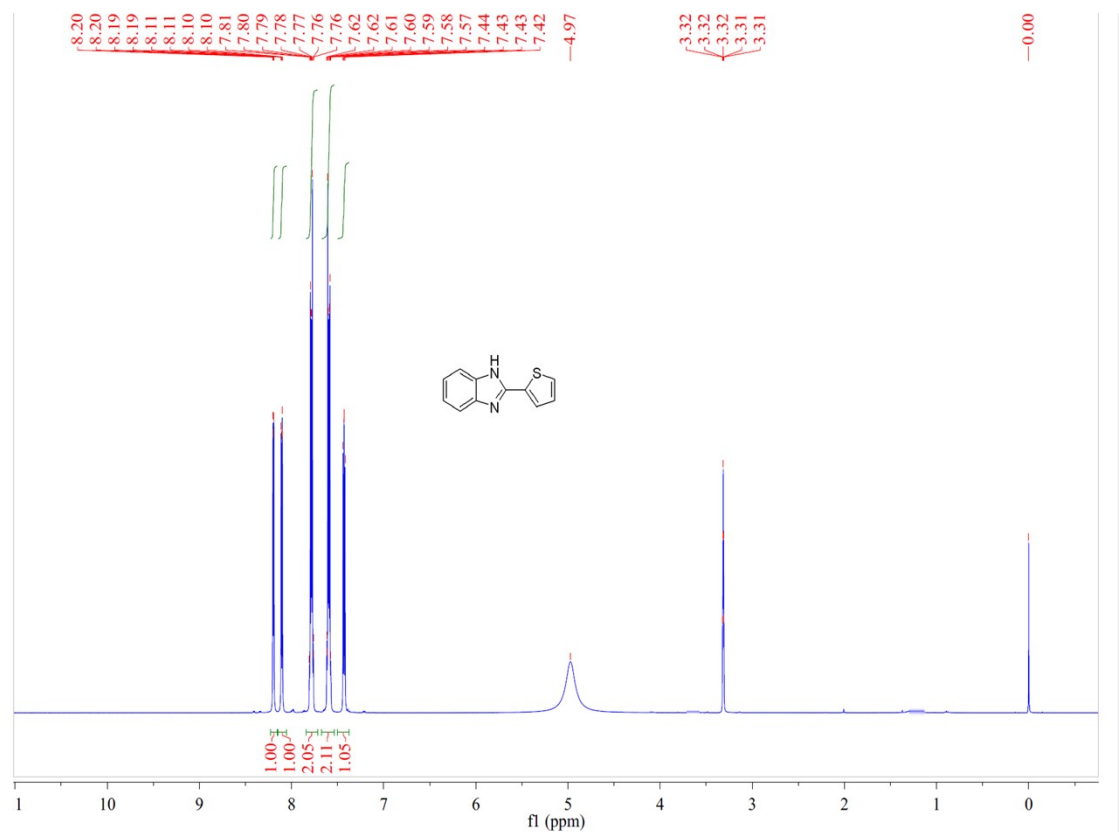

Figure S46  $^1\text{H NMR}$  of compound 2v in  $\text{CD}_3\text{OD}$

$^{13}\text{C}$  NMR (101 MHz,  $\text{CD}_3\text{OD}$ )  $\delta$  145.8, 135.5, 134.5, 132.7, 130.6, 127.8, 124.9, 114.7. HRMS

(ESI):  $m/z$   $[\text{M} + \text{H}]^+$  calcd for  $\text{C}_{11}\text{H}_9\text{S}_2$  201.0481

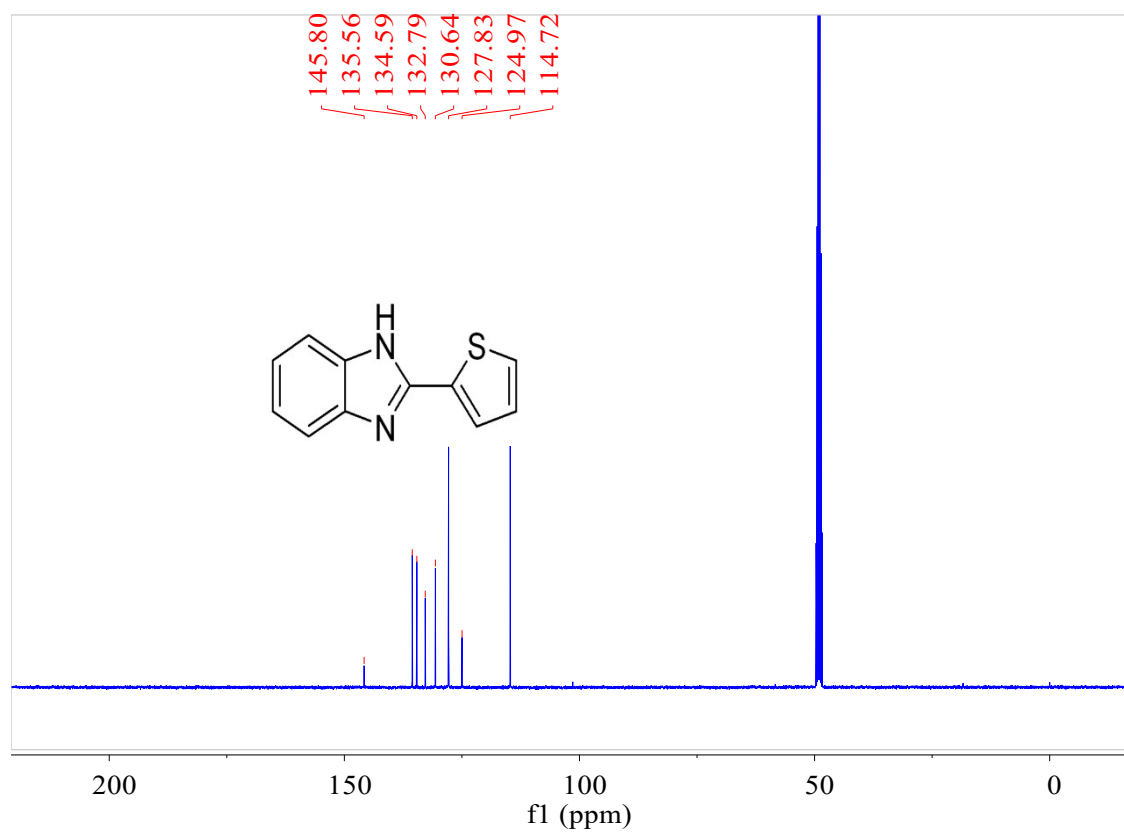

**Figure S47**  $^{13}\text{C}$ NMR of compound **2v** in Methano  $\text{CD}_3\text{OD}$



## Benzimidazoles 2w

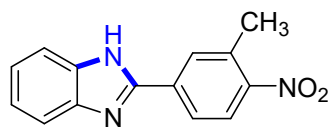

$^1\text{H NMR}$  (400 MHz,  $\text{DMSO-}d_6$ )  $\delta$  13.33 (s, 1H), 8.31 (s, 1H), 8.25 – 8.16 (m, 2H), 7.66 (dd,  $J = 5.9$ , 3.2 Hz, 2H), 7.32 – 7.23 (m, 2H), 2.64 (s, 3H)

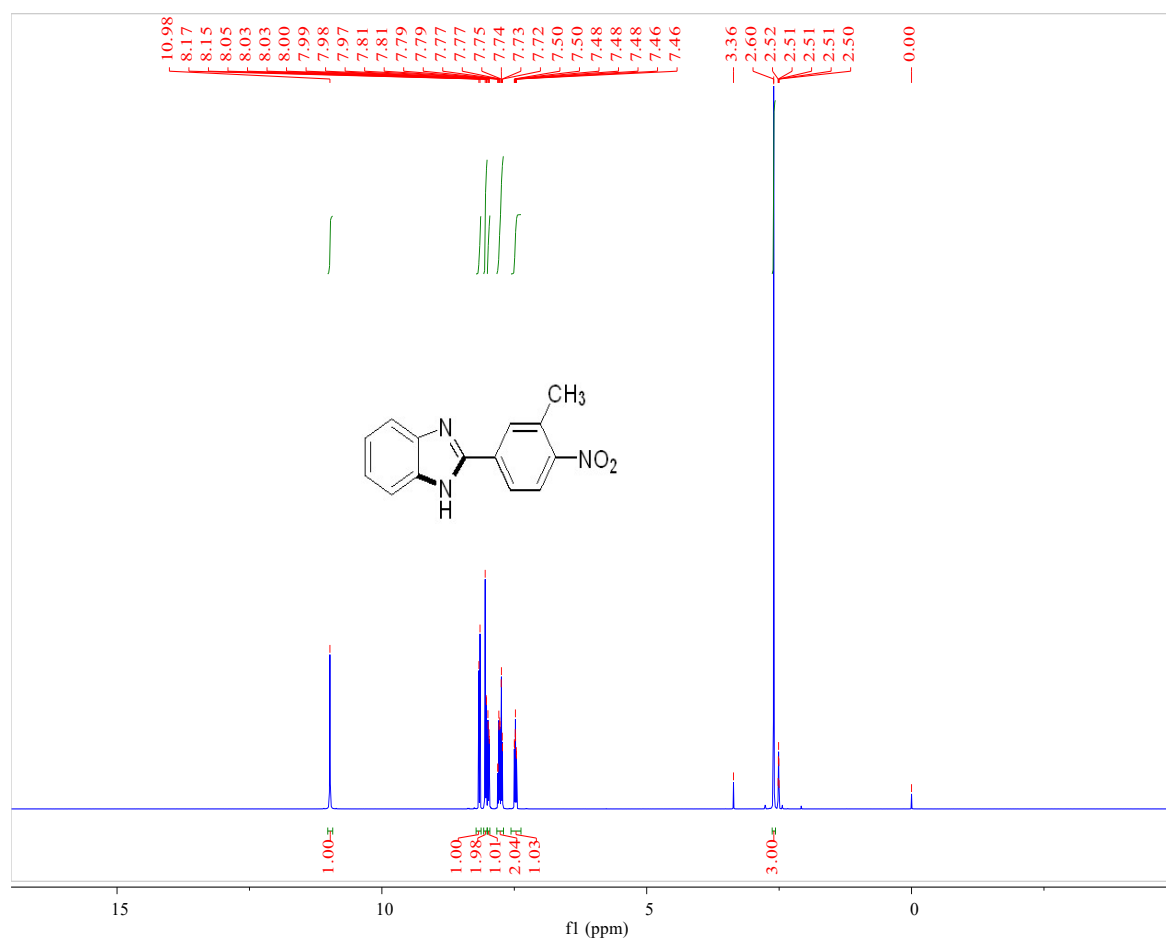

Figure S48  $^1\text{H NMR}$  of compound 2w in  $\text{DMSO-}d_6$

$^{13}\text{C}\{^1\text{H}\}$  NMR (100 MHz,  $\text{DMSO-}d_6$ )  $\delta$  149.4, 149.3, 139.9, 134.7, 134.1, 130.8, 130.7, 125.8, 125.3, 123.2, 115.9, 20.3; HRMS (ESI)  $m/z$   $[\text{M} + \text{H}]^+$  calcd for  $\text{C}_{14}\text{H}_{12}\text{N}_3\text{O}_2$  254.0924, found 254.0919.

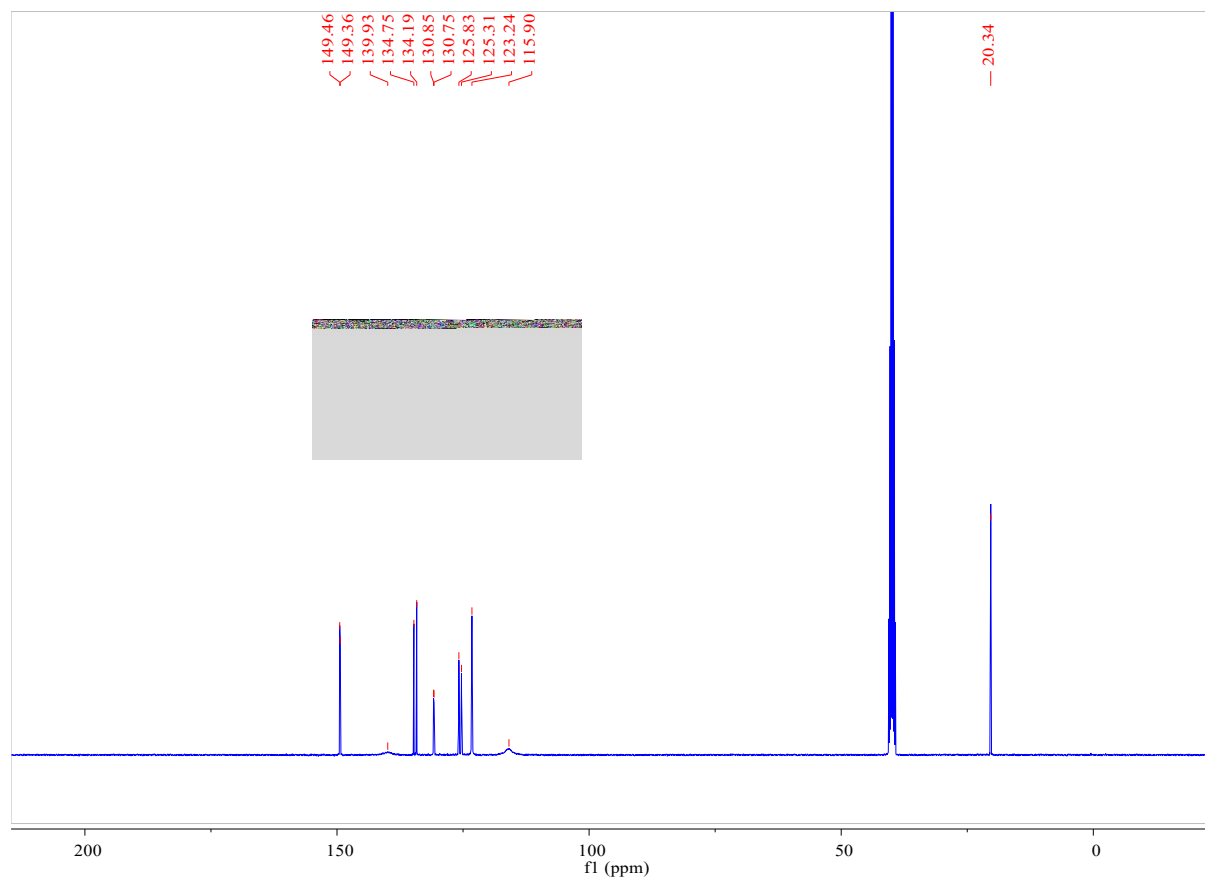

**Figure S49**  $^{13}\text{C}$ NMR of compound **2w** in  $\text{DMSO-}d_6$

### Benzimidazoles 2x

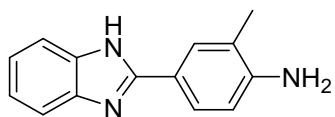

$^1\text{H NMR}$  (400 MHz,  $\text{DMSO-}d_6$ )  $\delta$  12.40 (s, 1H), 7.81 – 7.66 (m, 3H), 7.47 (s, 2H), 7.10 (dd,  $J = 5.9$ , 3.2 Hz, 2H), 6.69 (d,  $J = 8.3$  Hz, 1H), 5.35 (s, 2H), 2.14 (s, 3H).

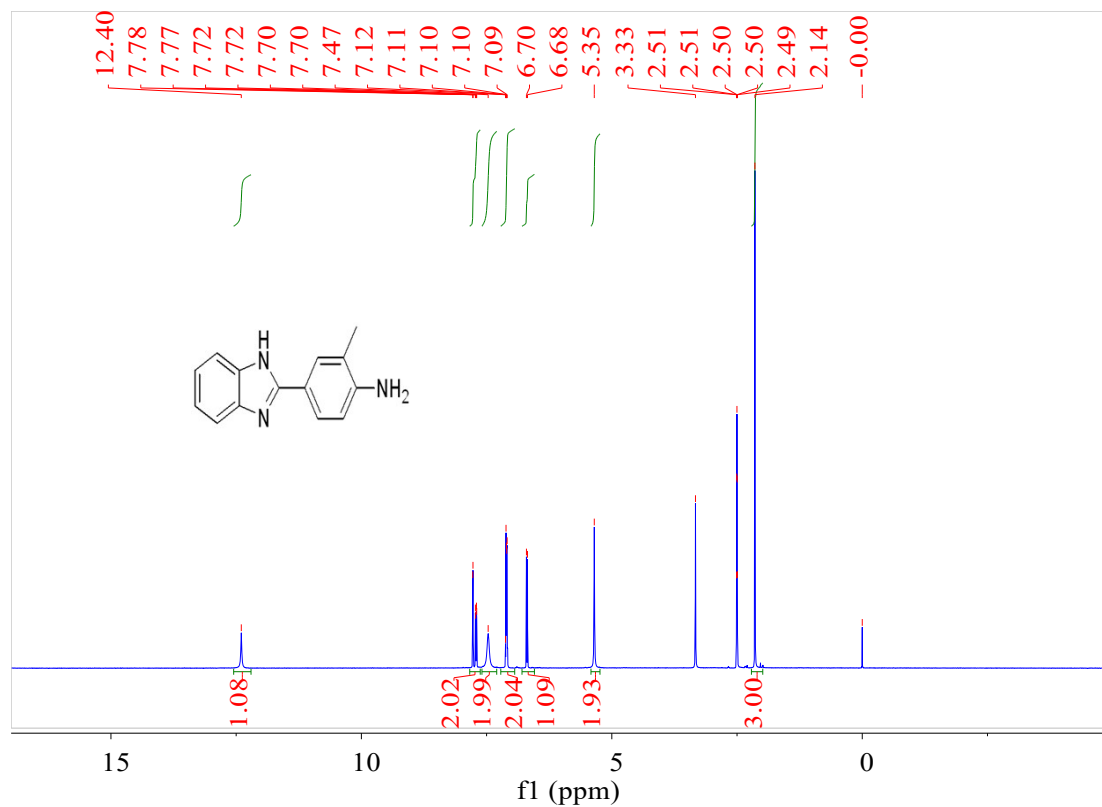

Figure S50  $^1\text{H NMR}$  of compound 2x in  $\text{DMSO-}d_6$

$^{13}\text{C}$  NMR (101 MHz, DMSO)  $\delta$  154.7, 148.7, 143.1, 137.1, 131.6, 128.3, 121.9, 121.9, 121.2, 118.77, 117.6, 113.8, 110.4, 32.2, 17.92. HRMS (ESI):  $m/z$   $[\text{M} + \text{H}]^+$  calcd for  $\text{C}_{14}\text{H}_{14}\text{N}_3$  224.1128

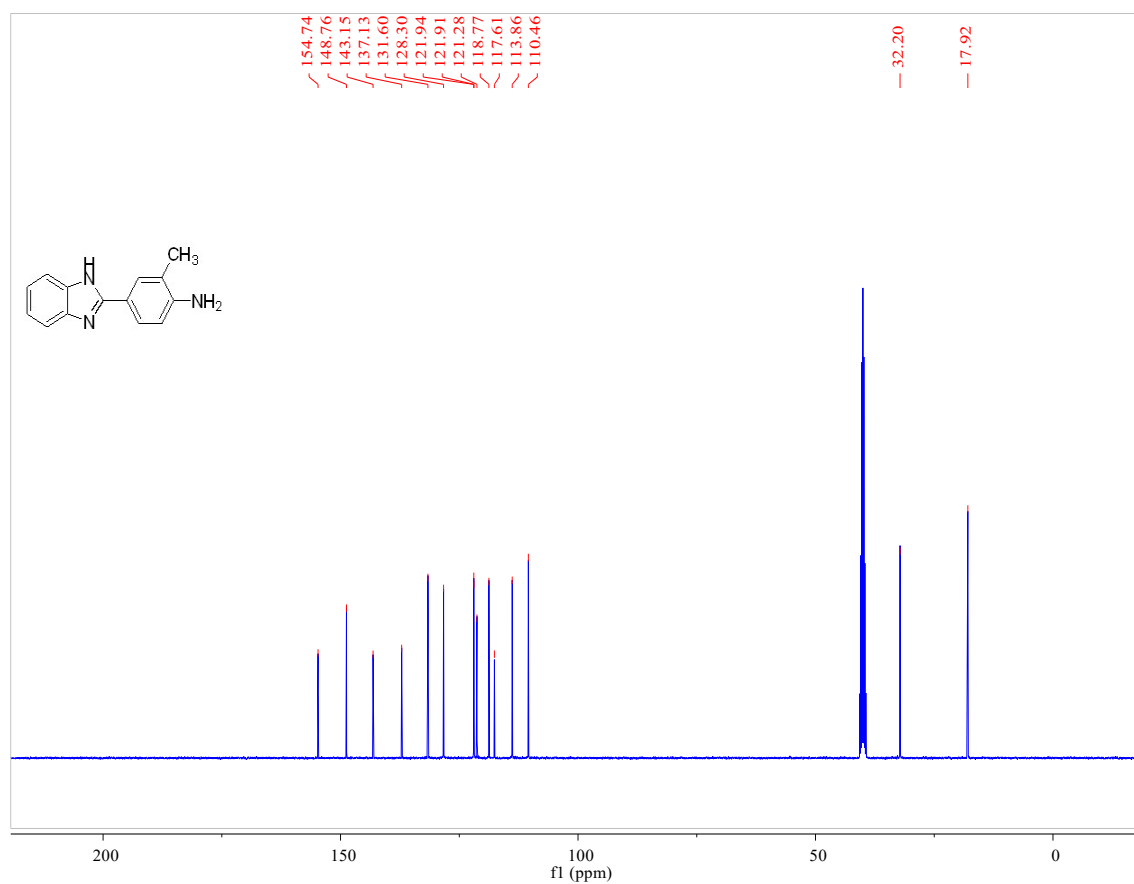

**Figure S51**  $^{13}\text{C}$ NMR of compound **2x** in  $\text{DMSO-}d_6$

### Benzimidazoles 2y

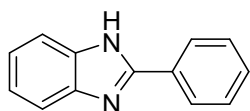

$^1\text{H NMR}$  (400 MHz,  $\text{DMSO-}d_6$ )  $\delta$  12.90 (s, 1H), 8.30 – 8.03 (m, 2H), 7.67 – 7.45 (m, 5H), 7.33 – 6.96 (m, 2H).

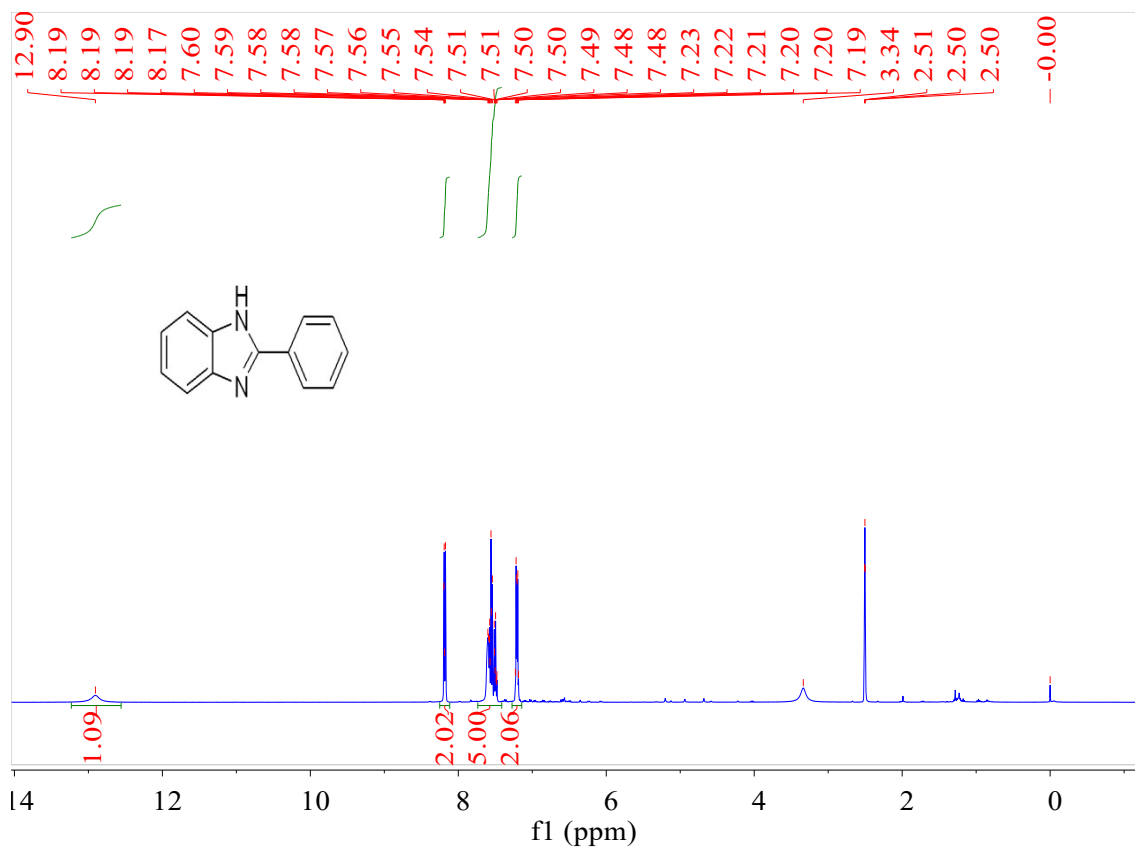

Figure S52  $^1\text{H NMR}$  of compound 2y in  $\text{DMSO-}d_6$

$^{13}\text{C}$  NMR (101 MHz, DMSO)  $\delta$  151.6, 130.6, 130.3, 129.4, 126.8, 122.5; HRMS (ESI):  $m/z$  [M + H] $^+$  calcd for  $\text{C}_{13}\text{H}_{11}\text{N}_2$  195.0917

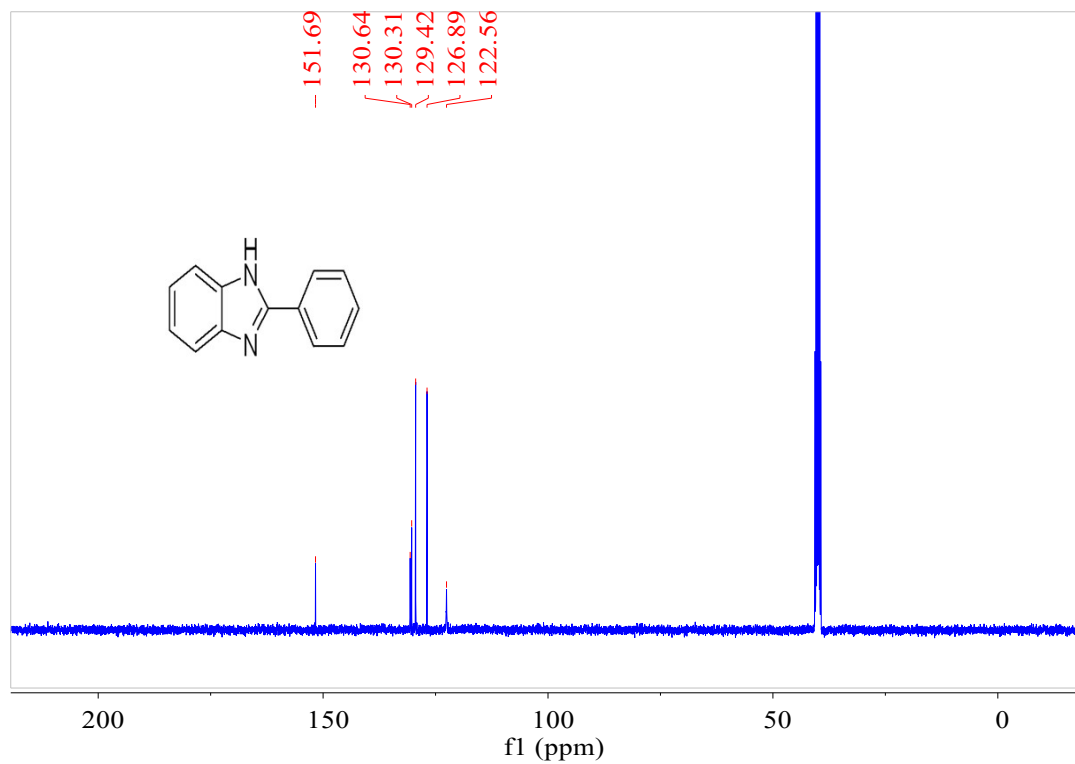

**Figure S53**  $^{13}\text{C}$ NMR of compound 2y in DMSO- $d_6$

### Benzimidazoles 2z

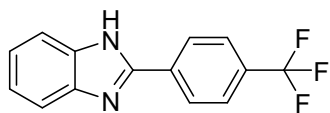

$^1\text{H NMR}$  (400 MHz,  $\text{CD}_3\text{OD}$ )  $\delta$  8.36 (d,  $J = 8.2$  Hz, 2H), 8.08 (d,  $J = 8.3$  Hz, 2H), 7.90 (dd,  $J = 6.2$ , 3.2 Hz, 2H), 7.68 (dd,  $J = 6.2$ , 3.1 Hz, 2H).

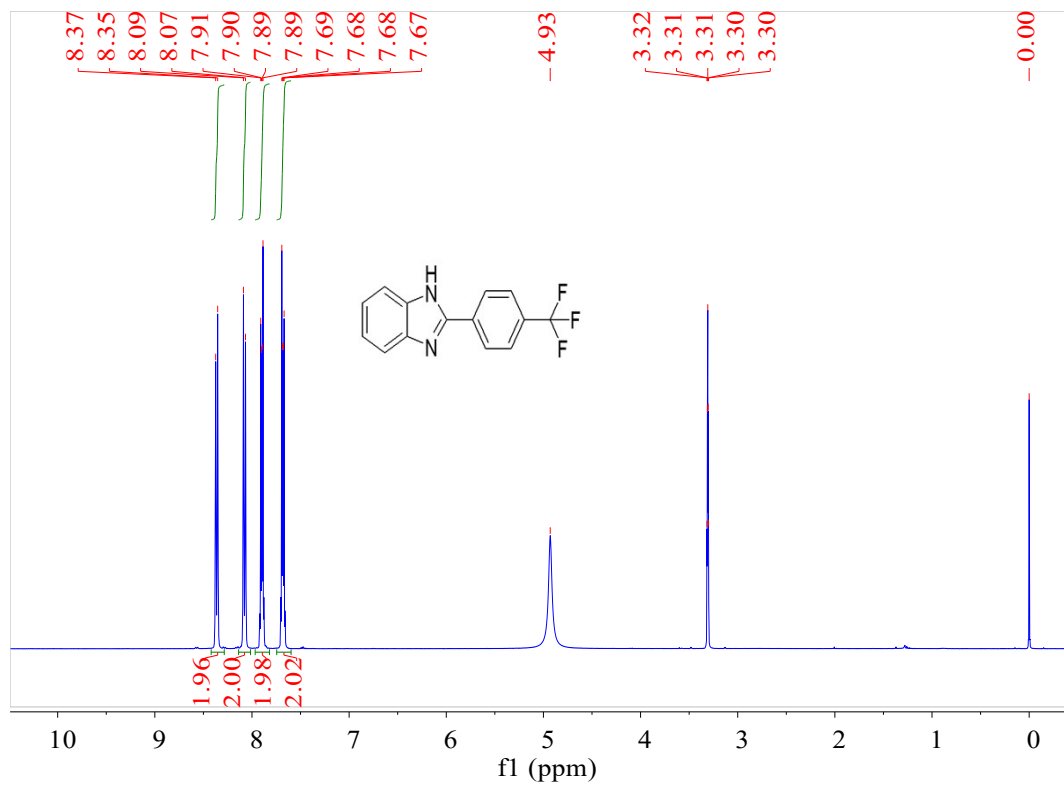

Figure S54  $^1\text{H NMR}$  of compound 2z in  $\text{CD}_3\text{OD}$

$^{13}\text{C}$  NMR (101 MHz,  $\text{CD}_3\text{OD}$ )  $\delta$  149.3, 135.9, 135.6, 133.2, 130.1, 128.3, 128.1, 128.1, 128.0, 127.9, 127.9, 126.2, 123.5, 115.2, HRMS (ESI):  $m/z$   $[\text{M} + \text{H}]^+$  calcd for  $\text{C}_{14}\text{H}_{10}\text{F}_3\text{N}_2$  263.0791

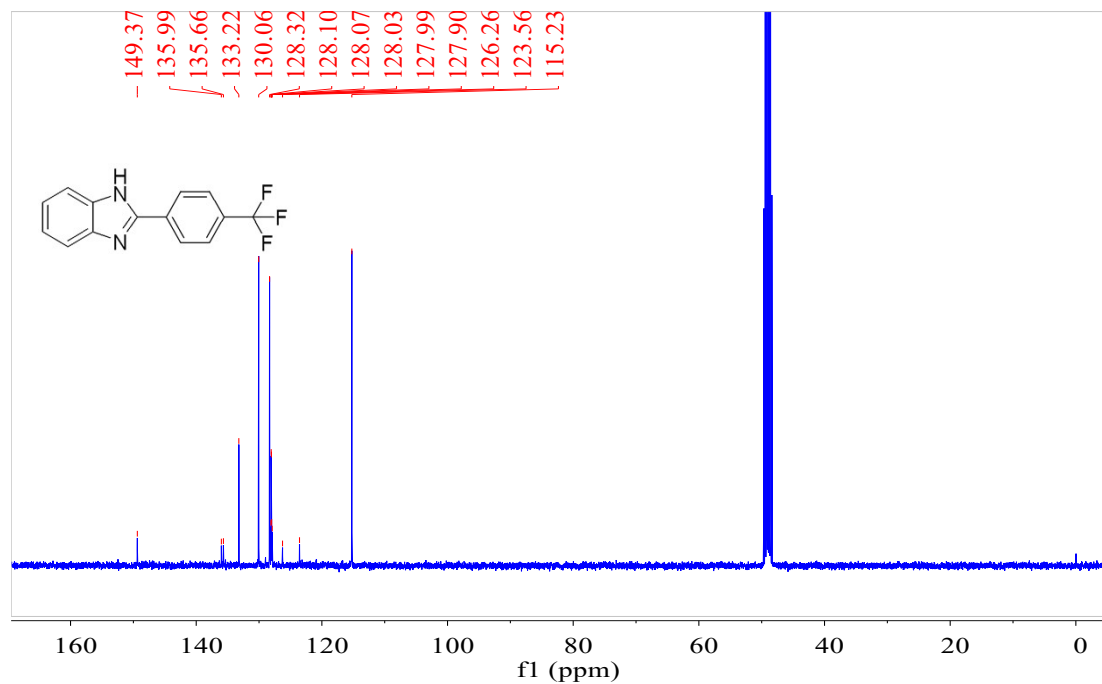

Figure S55  $^{13}\text{C}$ NMR of compound **2z** in  $\text{CD}_3\text{OD}$

$^{19}\text{F}$  NMR (377 MHz,  $\text{CD}_3\text{OD}$ )  $\delta$  -62.90, -63.13, -63.61.

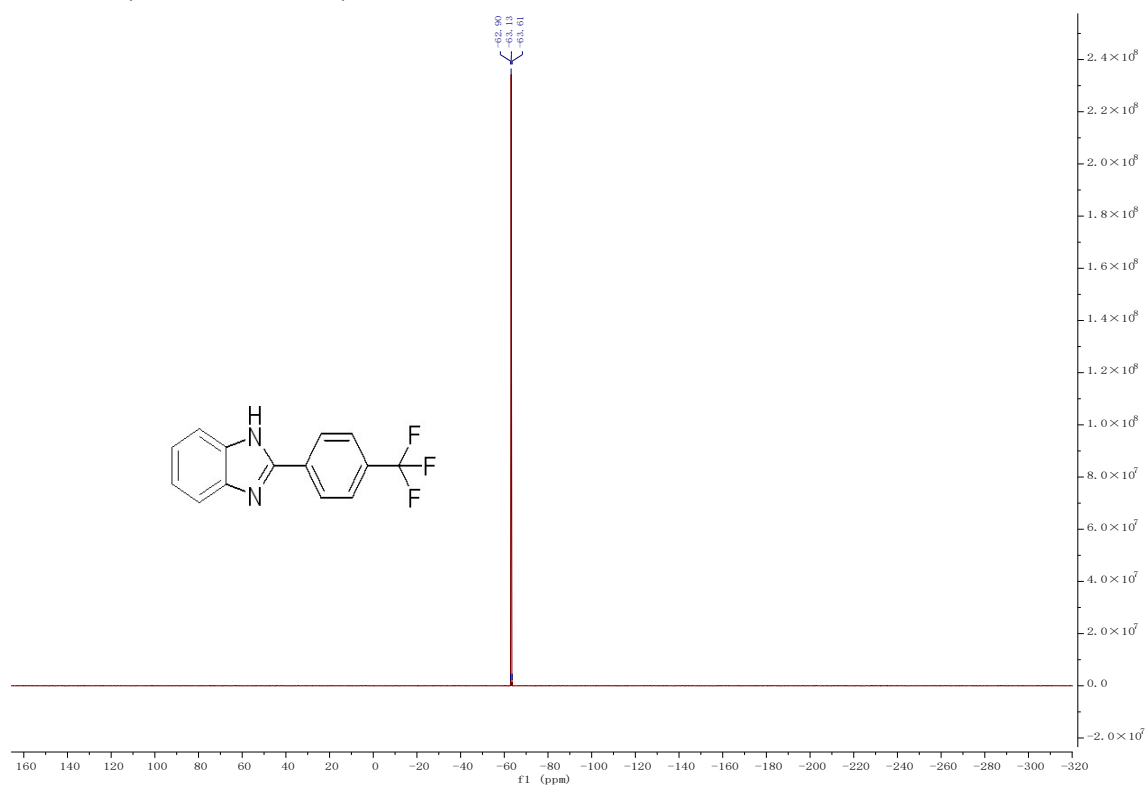



Figure S56  $^{19}\text{F}$  NMR of compound **2z** in  $\text{CD}_3\text{OD}$

Benzimidazoles **2aa**

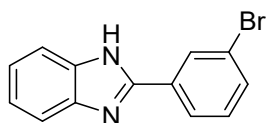

$^1\text{H}$  NMR (400 MHz,  $\text{DMSO-}d_6$ )  $\delta$  13.33 – 12.82 (s, 1H), 8.42 – 8.33 (t,  $J = 1.7$  Hz, 1H), 8.22 – 8.14 (dt,  $J = 7.8, 1.1$  Hz, 1H), 7.74 – 7.68 (ddd,  $J = 8.0, 1.9, 0.9$  Hz, 1H), 7.66 – 7.57 (s, 2H), 7.57 – 7.47 (t,  $J = 7.9$  Hz, 1H), 7.30 – 7.15 (m, 2H).

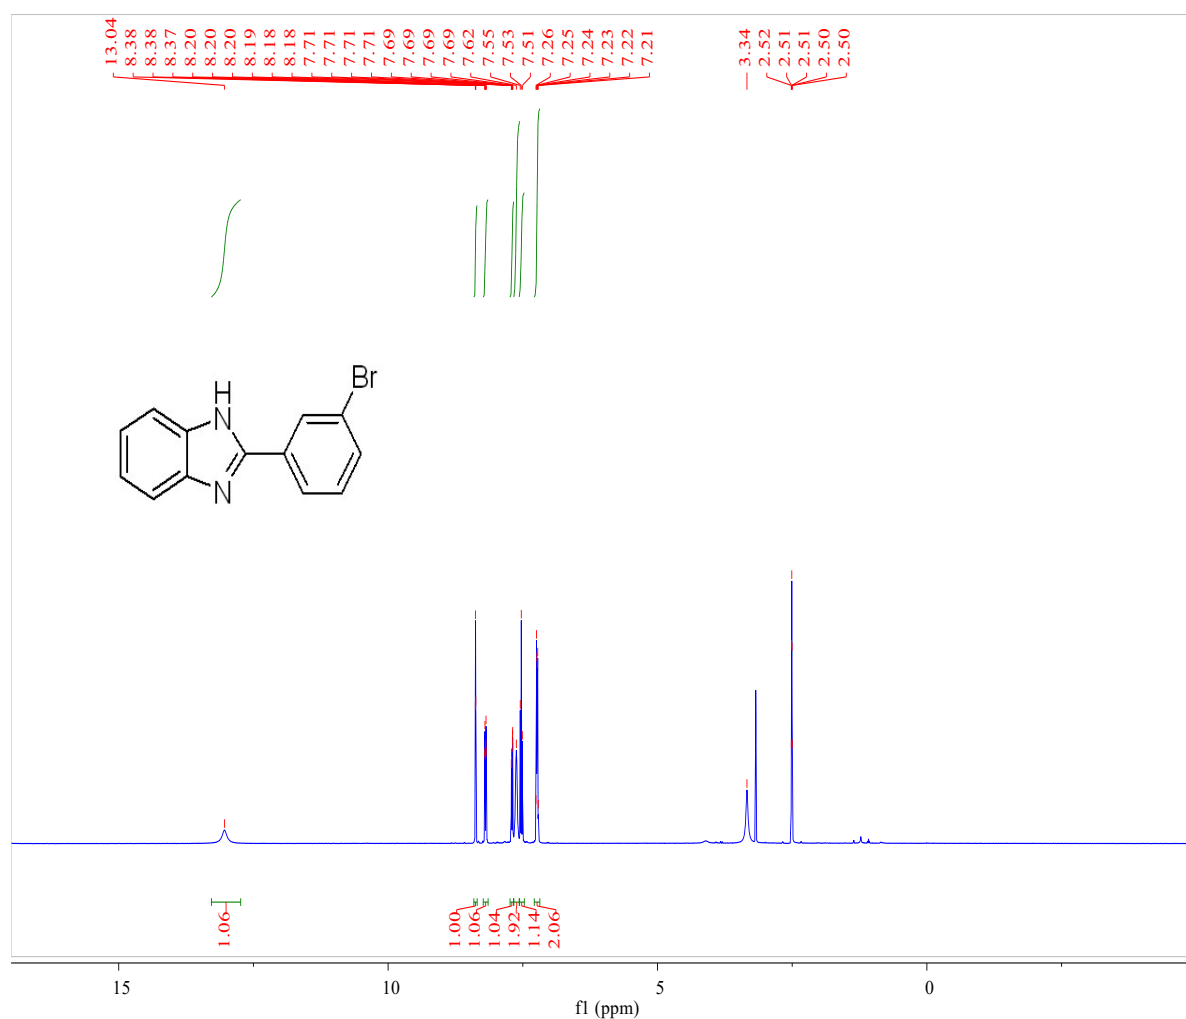

Figure S57  $^1\text{H}$  NMR of compound **2aa** in  $\text{DMSO-}d_6$

$^{13}\text{C}$  NMR (101 MHz, DMSO)  $\delta$  150.1, 132.9, 132.8, 131.6, 129.3, 125.8, 122.7, HRMS (ESI):  $m/z$

$[\text{M} + \text{H}]^+$  calcd for  $\text{C}_{13}\text{H}_{10}\text{BrN}_2$  273.0022

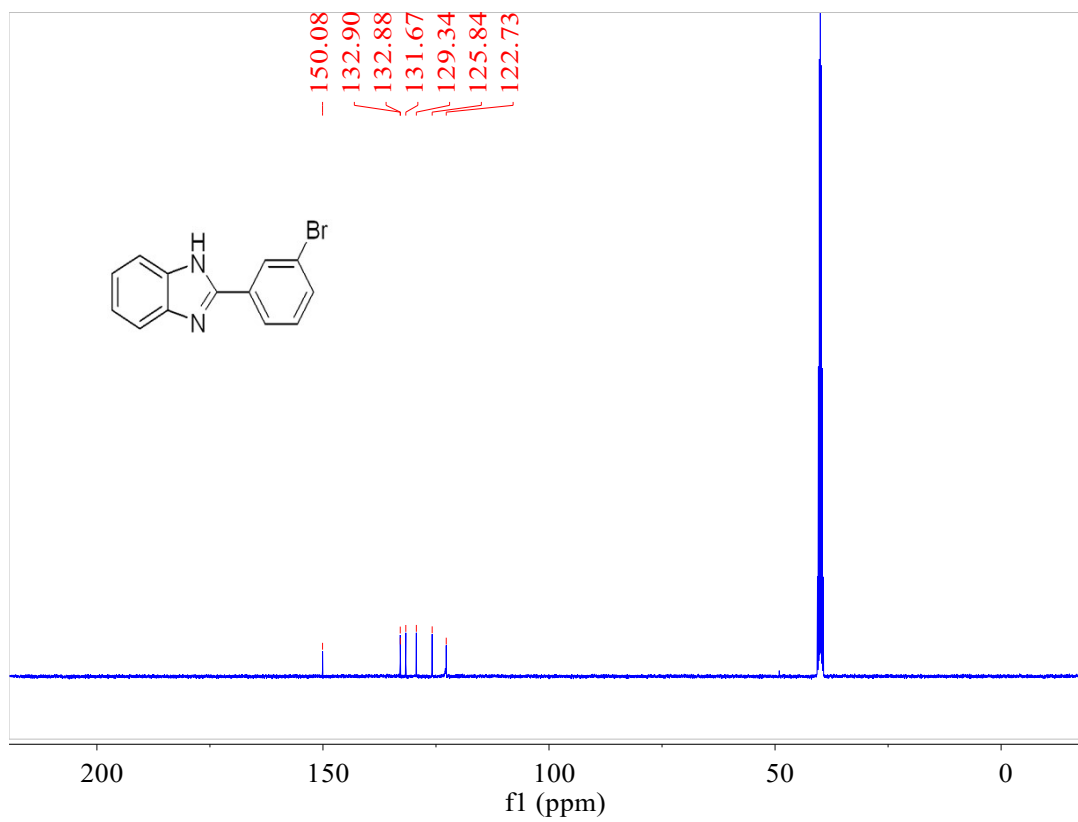

**Figure S58**  $^{13}\text{C}$ NMR of compound 2aa in  $\text{DMSO-}d_6$

### Benzimidazoles 2bb

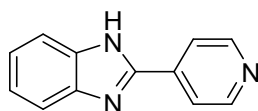

$^1\text{H NMR}$  (400 MHz,  $\text{CD}_3\text{OD}$ )  $\delta$  8.69 (d,  $J = 5.0$  Hz, 2H), 8.12 – 7.96 (m, 2H), 7.64 (dd,  $J = 5.9, 3.2$  Hz, 2H), 7.40 – 7.22 (m, 2H).

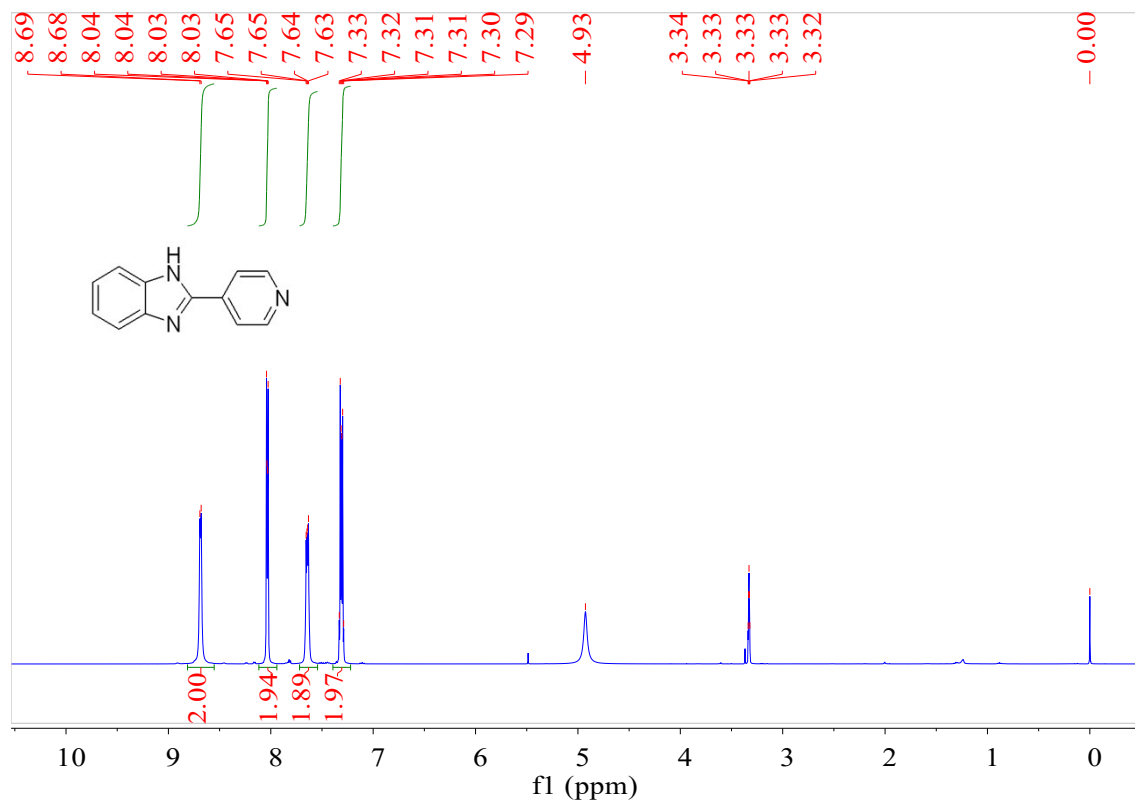

**Figure S59**  $^1\text{H NMR}$  of compound **2bb** in  $\text{CD}_3\text{OD}$

$^{13}\text{C}$  NMR (101 MHz,  $\text{CD}_3\text{OD}$ )  $\delta$  151.1, 150.0, 139.2, 124.8, 122.1, 116.6, 112.7, HRMS (ESI):  $m/z$

$[\text{M} + \text{H}]^+$  calcd for  $\text{C}_{12}\text{H}_{10}\text{N}_3$  196.0896

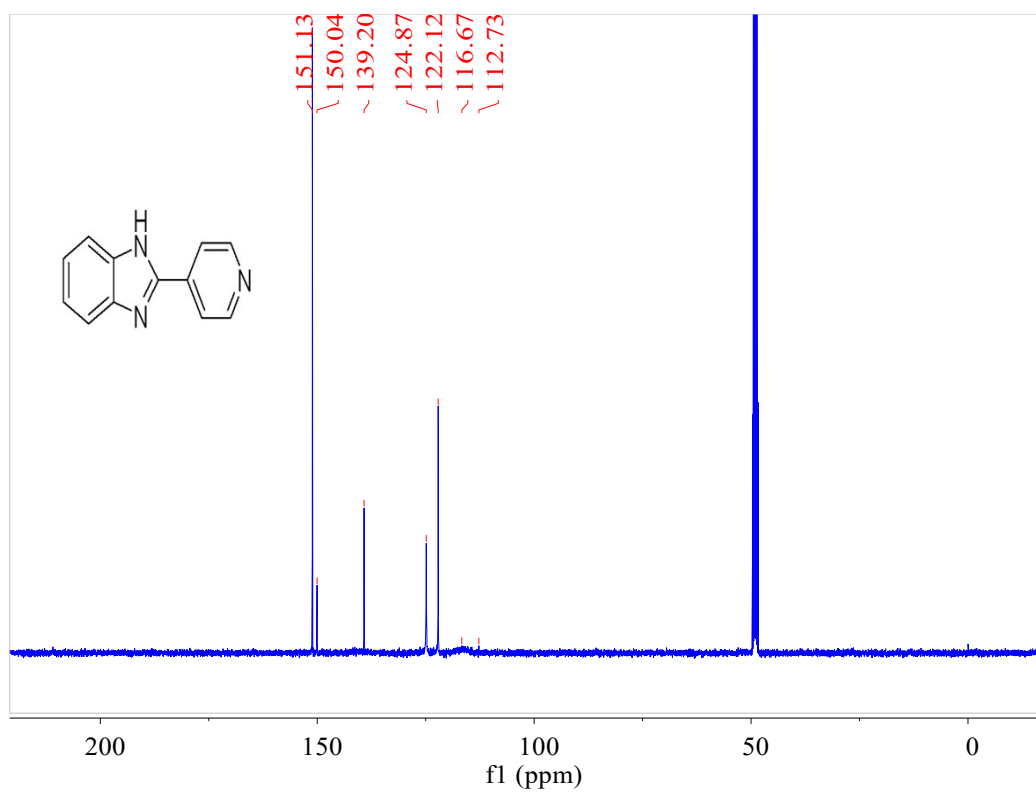

**Figure S60**  $^{13}\text{C}$ NMR of compound **2bb** in  $\text{CD}_3\text{OD}$

### Benzimidazoles 2cc

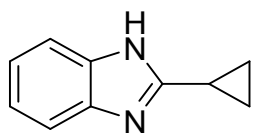

$^1\text{H NMR}$  (400 MHz,  $\text{CDCl}_3$ )  $\delta$  7.51 (dd,  $J = 6.0, 3.2$  Hz, 2H), 7.19 (dd,  $J = 6.0, 3.2$  Hz, 2H), 2.16 – 1.99 (m, 1H), 1.35 – 1.19 (m, 2H), 1.18 – 0.97 (m, 2H).

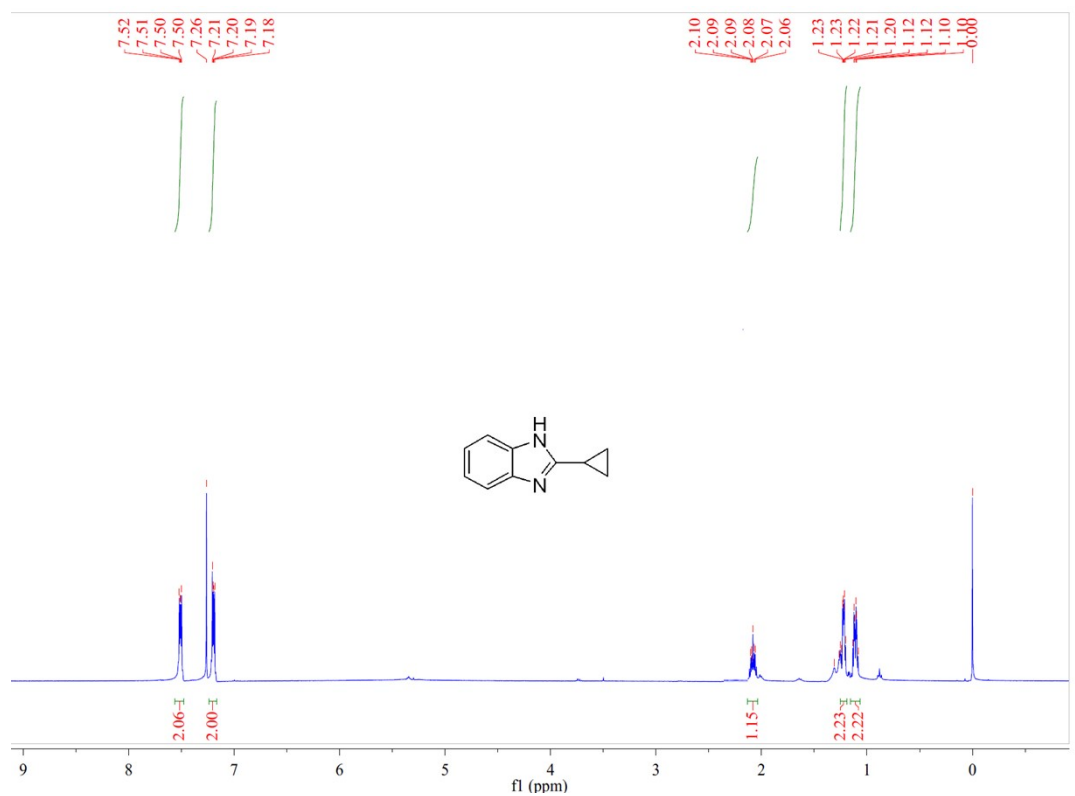

**Figure S61**  $^1\text{H NMR}$  of compound 2cc in  $\text{CDCl}_3$

$^{13}\text{C}$  NMR (101 MHz,  $\text{CDCl}_3$ )  $\delta$  156.5, 135.5, 122.2, 114.3, 9.6, 8.8, -0.01. HRMS (ESI):  $m/z$  [ $\text{M} + \text{H}$ ] $^+$  calcd for  $\text{C}_{10}\text{H}_{11}\text{N}_2$  159.0917.

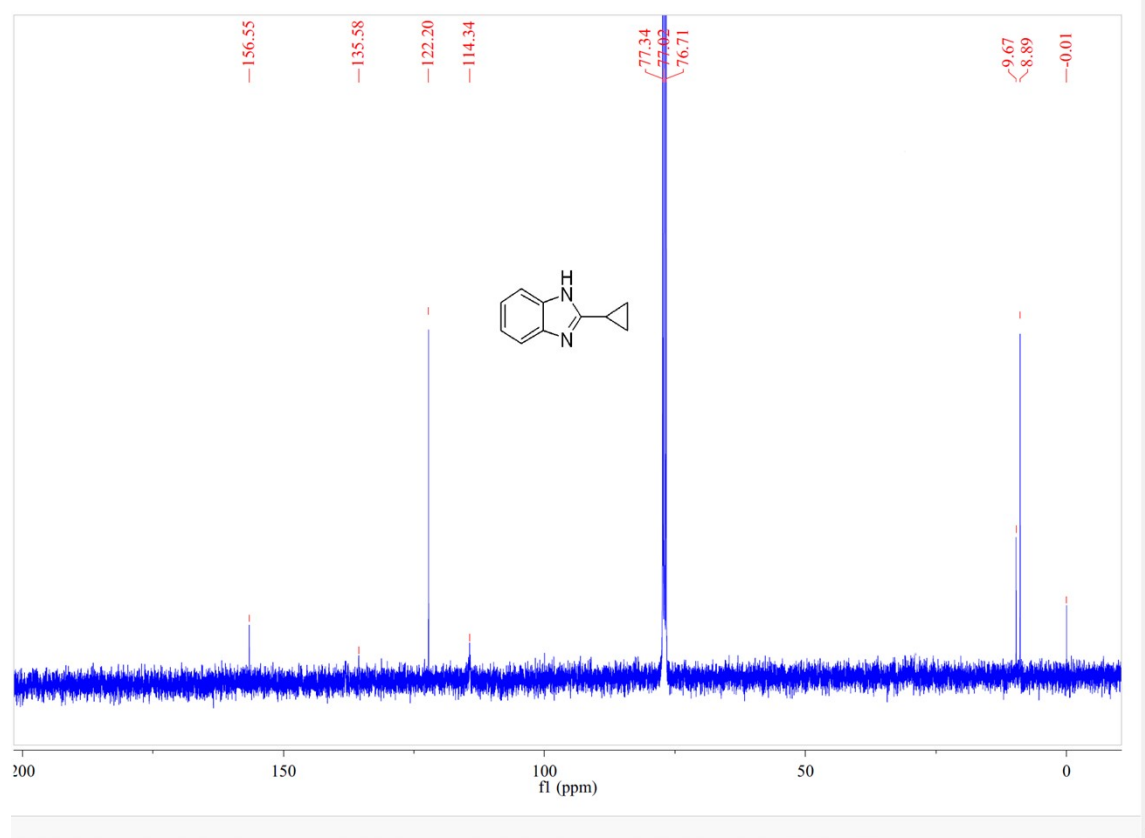

**Figure S62**  $^{13}\text{C}$ NMR of compound **2cc** in  $\text{CDCl}_3$

## Benzazol

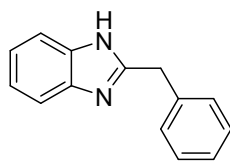

$^1\text{H NMR}$  (400 MHz,  $\text{DMSO-}d_6$ )  $\delta$  15.53 (s, 1H), 7.77 (dt,  $J = 6.7, 3.4$  Hz, 2H), 7.62 – 7.46 (m, 4H), 7.44– 6.86 (m, 3H), 4.57 (s, 2H).

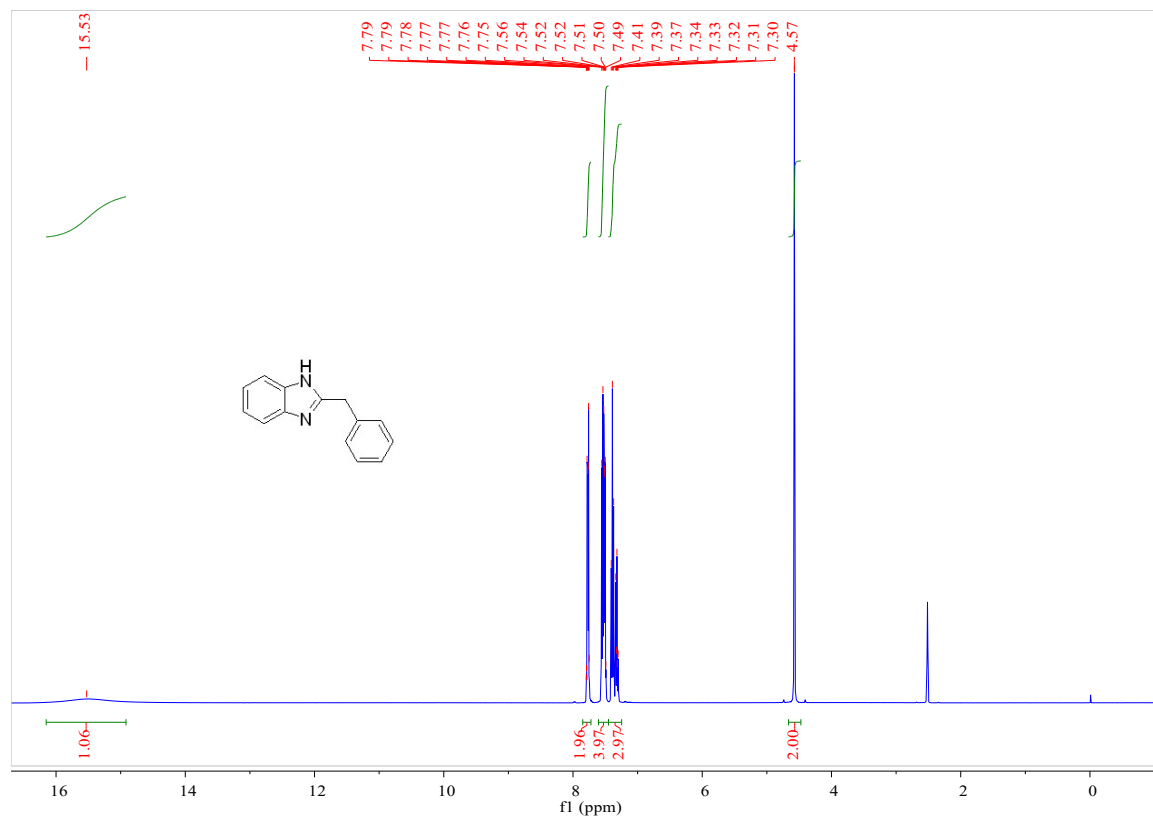

Figure S63  $^1\text{H NMR}$  of benzazol in  $\text{DMSO-}d_6$

$^{13}\text{C}$  NMR (101 MHz, DMSO)  $\delta$  152.5, 134.0, 130.7, 129.1, 128.9, 127.6, 125.5, 113.8, 31.8.

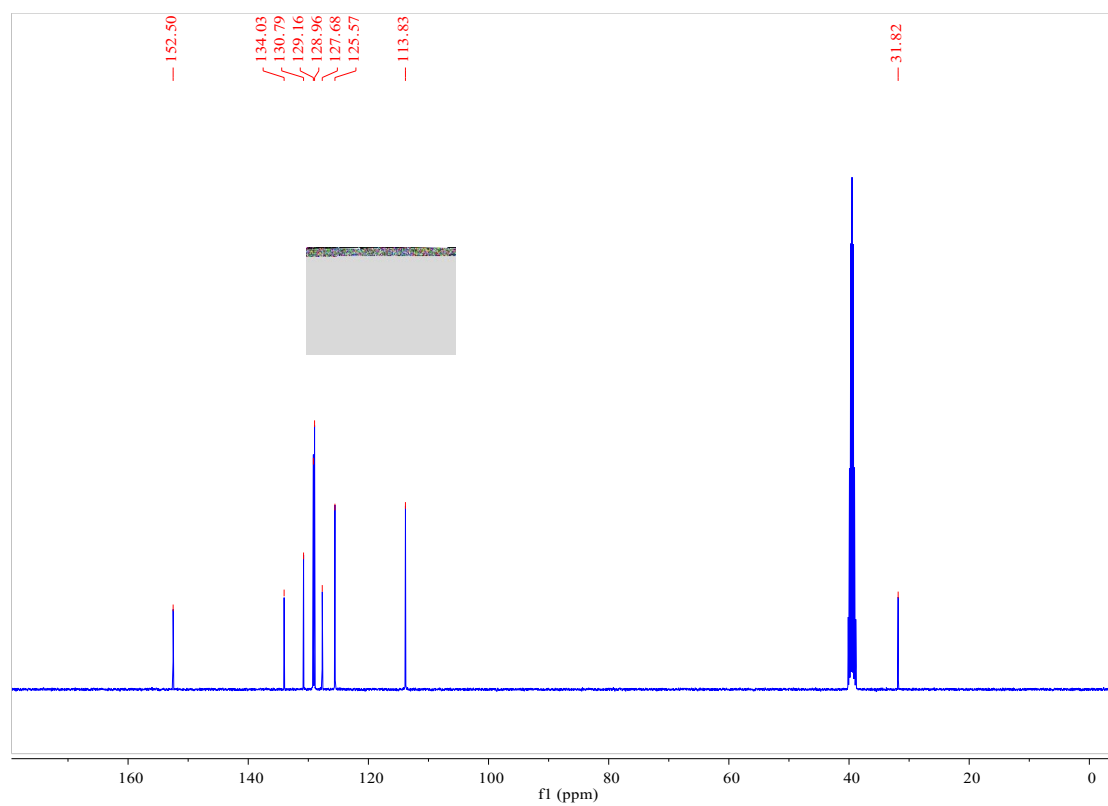

**Figure S64**  $^{13}\text{C}$ NMR of bendazol in  $\text{DMSO-}d_6$



### Thiabendazole

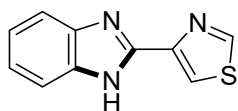

$^1\text{H}$  NMR (400 MHz,  $\text{DMSO-}d_6$ )  $\delta$  13.00 (s, 1H), 9.34 (d,  $J = 2.0$  Hz, 1H), 8.47 (d,  $J = 1.9$  Hz, 1H), 7.61 (dd,  $J = 55.4, 7.1$  Hz, 2H), 7.23 (dt,  $J = 8.6, 4.9$  Hz, 2H).

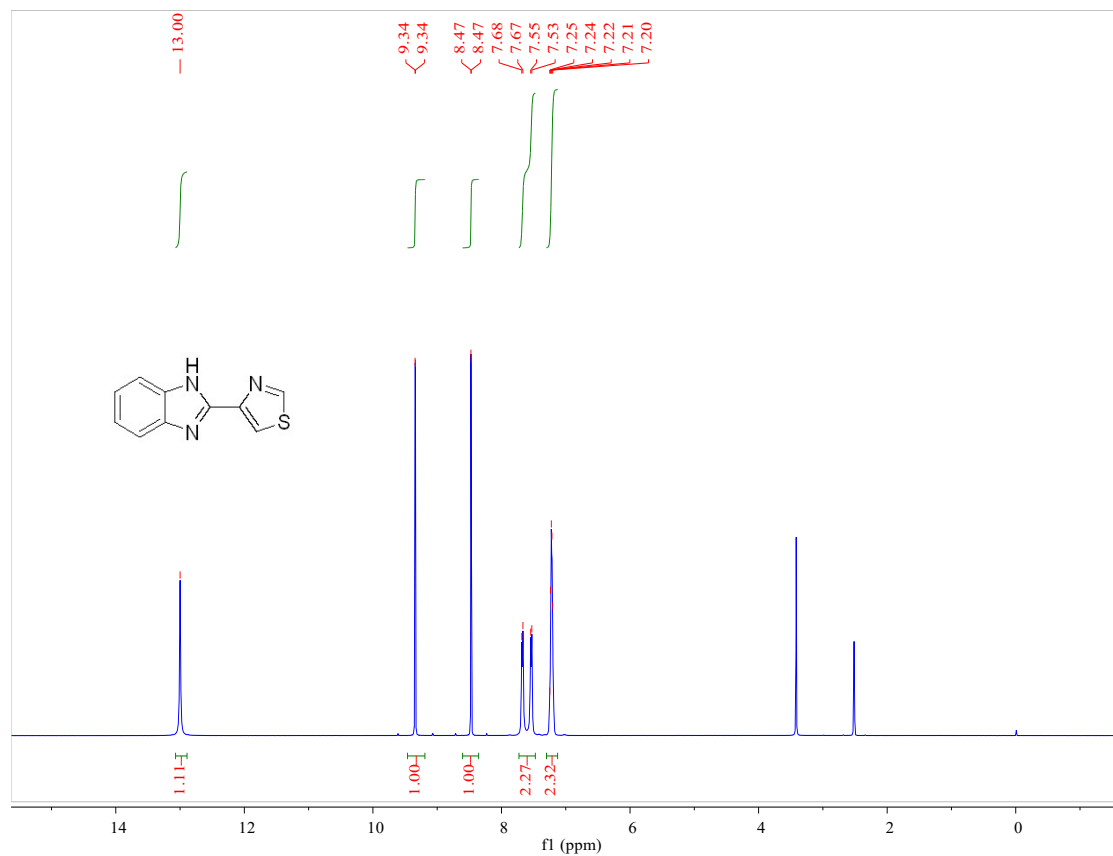

Figure S65  $^1\text{H}$ NMR of thiabendazole in  $\text{DMSO-}d_6$

$^{13}\text{C}$  NMR (101 MHz, DMSO)  $\delta$  155.5, 147.0, 146.9, 143.7, 134.3, 122.5, 121.7, 119.3, 118.7, 111.7.

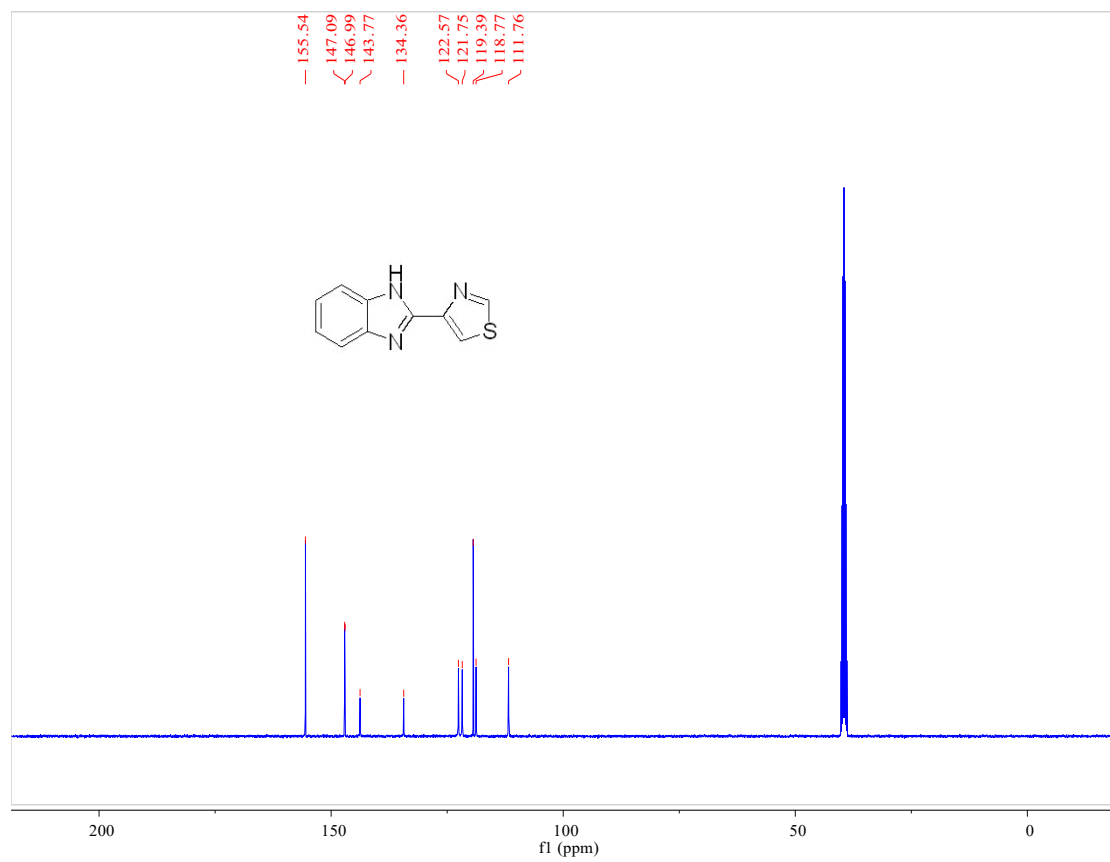

**Figure S66**  $^{13}\text{C}$ NMR of thiabendazole in  $\text{DMSO-}d_6$
